# Supplementary material for: Integrated bioinformatics analysis of potential pathway biomarkers using abnormal proteins in clubfoot
Source: PeerJ. 2020 Jan 20;8:e8422. doi: 10.7717/peerj.8422 (PMC6977474; doi:10.7717/peerj.8422)
Supplement: Data S1 [file peerj-08-8422-s003.xlsx]

## Sheet: Proteins
Entry ID	Entry name	Protein names	Gene names	Gene names	Length	Res
Q9BXN1	ASPN_HUMAN	Asporin	ASPN	ASPN, PLAP1, SLRR1C, UNQ215/PRO241	380	Proteomic analysis of the extracellular matrix in idiopathic pes equinovarus
P21810	PGS1_HUMAN	Biglycan	BGN	BGN, SLRR1A	368	Proteomic analysis of the extracellular matrix in idiopathic pes equinovarus
Q8IUL8	CILP2_HUMAN	Cartilage intermediate layer protein 2, CILP-2	CILP2	CILP2	1156	Novel contribution to clubfoot pathogenesis The possible role of extracellular matrix proteins
P35222	CTNB1_HUMAN	Catenin beta-1 (Beta-catenin)	CTNNB1	CTNNB1, CTNNB, OK/SW-cl.35, PRO2286	781	Beta-catenin Mediates Soft Tissue Contracture in Clubfoot/2007 Apoptotic gene analysis in idiopathic talipes equinovarus (clubfoot)
P02461	CO3A1_HUMAN	Collagen alpha-1(III) chain	COL3A1	COL3A1	1466	Novel contribution to clubfoot pathogenesis The possible role of extracellular matrix proteins
P20908	CO5A1_HUMAN	Collagen alpha-1(V) chain	COL5A1	COL5A1	1838	Novel contribution to clubfoot pathogenesis The possible role of extracellular matrix proteins
P12109	CO6A1_HUMAN	Collagen alpha-1(VI) chain	COL6A1	COL6A1	1028	Novel contribution to clubfoot pathogenesis The possible role of extracellular matrix proteins
Q99715	COCA1_HUMAN	Collagen alpha-1(XII) chain	COL12A1	COL12A1COL12A1L	3063	Novel contribution to clubfoot pathogenesis The possible role of extracellular matrix proteins
Q05707	COEA1_HUMAN	Collagen alpha-1(XIV) chain (Undulin)	COL14A1	COL14A1 UND	1796	Novel contribution to clubfoot pathogenesis The possible role of extracellular matrix proteins
P08123	CO1A2_HUMAN	Collagen alpha-2(I) chain	COL1A2	COL1A2	1366	Proteomic analysis of the extracellular matrix in idiopathic pes equinovarus
P12110	CO6A2_HUMAN	Collagen alpha-2(VI) chain	COL6A2	COL6A2	1019	Novel contribution to clubfoot pathogenesis The possible role of extracellular matrix proteins
P12111	CO6A3_HUMAN	Collagen alpha-3(VI) chain	COL6A3	COL6A3	3177	Novel contribution to clubfoot pathogenesis The possible role of extracellular matrix proteins
P20849	CO9A1_HUMAN	Collagen alpha-1(IX) chain	COL9A1	COL9A1	2	SOX9 overexpression plays a potential role in idiopathic congenital talipes equinovarus
O94907	DKK1_HUMAN	Dickkopf-related protein 1, Dickkopf-1	DKK1	DKK1UNQ492/PRO1008	266	Beta-catenin Mediates Soft Tissue Contracture in Clubfoot/2007 Apoptotic gene analysis in idiopathic talipes equinovarus (clubfoot)
Q06828	FMOD_HUMAN	Fibromodulin	FMOD	FMOD FM, SLRR2E	376	Novel contribution to clubfoot pathogenesis The possible role of extracellular matrix proteins
P02751	FINC_HUMAN	Fibronectin (Cold-insoluble globulin, CIG)	FN1	FN1, FN	2386	Proteomic analysis of the extracellular matrix in idiopathic pes equinovarus
Q14192	FHL2_HUMAN	Four and a half LIM domains protein	FHL2	FHL2 DRAL, SLIM3	279	HOXD13 may play a role in idiopathic congenital clubfoot by regulating the expression of FHL1
P35453	HXD13_HUMAN	Homeobox protein Hox-D13 (Homeobox protein Hox-4I)	HOXD13	HOXD13 HOX4I	343	HOXD13 may play a role in idiopathic congenital clubfoot by regulating the expression of FHL1
P51884	LUM_HUMAN	Lumican	LUM	LUM LDC, SLRR2D	338	2015 Proteomic analysis of the extracellular matrix in idiopathic pes equinovarus
Q16853	AOC3_HUMAN	Membrane primary amine oxidase	AOC3	AOC3 VAP1	763	2015 Proteomic analysis of the extracellular matrix in idiopathic pes equinovarus
P20774	MIME_HUMAN	Mimecan (Osteoglycin)	OGN	OGN OIF, SLRR3A	298	2015 Proteomic analysis of the extracellular matrix in idiopathic pes equinovarus
Q15063	POSTN_HUMAN	Periostin (Osteoblast-specific factor 2)	POSTN	POSTN OSF2	836	2015 Proteomic analysis of the extracellular matrix in idiopathic pes equinovarus
P51888	PRELP_HUMAN	Prolargin	PRELP	PRELP SLRR2A	382	2015 Proteomic analysis of the extracellular matrix in idiopathic pes equinovarus
Q7Z7G0	TARSH_HUMAN	Target of Nesh-SH3	ABI3BP	ABI3BP NESHBP, TARSH	1075	2015 Proteomic analysis of the extracellular matrix in idiopathic pes equinovarus
P24821	TENA_HUMAN	Tenascin, TN (Cytotactin)	TNC	TNC HXB	2201	Proteomic analysis of the extracellular matrix in idiopathic pes equinovarus/ Novel contribution to clubfoot pathogenesis The possible role of extracellular matrix proteins
Q15582	BGH3_HUMAN	TGF-β-induced protein ig-h3	TGFBI	TGFBI BIGH3	683	Novel contribution to clubfoot pathogenesis The possible role of extracellular matrix proteins
P48436	SOX9_HUMAN	Transcription factor SOX-9	SOX9	SOX9	509	SOX9 overexpression plays a potential role in idiopathic congenital talipes equinovarus
P10071	GLI3_HUMAN	Transcriptional activator GLI3	GLI3	GLI3	1580	The expression of Gli3, regulated by HOXD13, may play a role in idiopathic congenital talipes equinovarus
P01137	TGFB1_HUMAN	TGF-β-1 proprotein	TGFB1	TGFB1 TGFB	390	Potential Treatment for Clubfeet Based on Growth Factor Blockade
P13611	CSPG2_HUMAN	Versican core protein	VCAN	VCAN CSPG2	3396	Proteomic analysis of the extracellular matrix in idiopathic pes equinovarus/Novel contribution to clubfoot pathogenesis The possible role of extracellular matrix proteins

## Sheet: KEGG
NetworkAnalyst						WeWebGestalt									gprofiler
Name	Hits	Pval	AdjP	"-LOG(AdjP)		Description	Size	Expect	Ratio	P Value	FDR	FDR	Gene Set		term_name	term_id	adjusted_p_value	negative_log10_of_adjusted_p_value	term_size	query_size	intersection_size		effective_domain_size	intersections
Protein digestion and absorption	8/90	2.75e-11	8.73e-09	8.05899		Focal adhesion	199	0.5062	13.828	3.2949e-07	0	>50	hsa04510		Protein digestion and absorption	KEGG:04974	2.37921e-09	8.62357	90	20	8	7332	P02461,P20908,P12109,Q99715,Q05707,P08123,P12110,P12111
ECM-receptor interaction	6/82	4.05e-08	6.45e-06	5.19044		Protein digestion and absorption	90	0.2289	34.943	2.1976e-11	7.1643e-09	8.14483	hsa04974		ECM-receptor interaction	KEGG:04512	3.15325e-06	5.50124	82	20	6	7332	P12109,P08123,P12110,P12111,P02751,P24821
Focal adhesion	7/199	3.91e-07	4.15e-05	4.38195		ECM-receptor interaction	82	0.2086	28.764	3.5229e-08	5.7424e-06	5.24091	hsa04512		Focal adhesion	KEGG:04510	2.96918e-05	4.52736	197	20	7	7332	P35222,P12109,P08123,P12110,P12111,P02751,P24821
Amoebiasis	4/96	9.26e-05	0.00691	2.16052		Human papillomavirus infection	339	0.8624	8.1172	0	0.001	3	hsa05165		Human papillomavirus infection	KEGG:05165	0.000910626	3.04066	329	20	7	7332	P35222,P12109,P08123,P12110,P12111,P02751,P24821
AGE-RAGE signaling pathway in diabetic complications	4/100	0.000109	0.00691	2.16052		Amoebiasis	96	0.2442	16.379	0.0001	0.0052	2.284	hsa05146		Amoebiasis	KEGG:05146	0.00594631	2.22575	94	20	4	7332	P02461,P08123,P02751,P01137
PI3K-Akt signaling pathway	6/354	0.000197	0.0105	1.97881		AGE-RAGE signaling pathway in diabetic complications	99	0.2518	15.883	0.0001	0.0052	2.284	hsa04933		AGE-RAGE signaling pathway in diabetic complications	KEGG:04933	0.00699443	2.15525	98	20	4	7332	P02461,P08123,P02751,P01137
Proteoglycans in cancer	4/201	0.00154	0.0702	1.15366		PI3K-Akt signaling pathway	354	0.9005	6.6628	0.0002	0.0081	2.09151	hsa04151		PI3K-Akt signaling pathway	KEGG:04151	0.014082	1.85134	350	20	6	7332	P12109,P08123,P12110,P12111,P02751,P24821
Basal cell carcinoma	2/63	0.0113	0.448	0.348722		Proteoglycans in cancer	201	0.5113	7.823	0.0014	0.0585	1.23284	hsa05205
Bacterial invasion of epithelial cells	2/74	0.0153	0.542	0.266001		Relaxin signaling pathway	130	0.3307	9.0717	0.0041	0.1475	0.831208	hsa04926
Colorectal cancer	2/86	0.0204	0.648	0.188425		Basal cell carcinoma	63	0.1603	12.479	0.0109	0.3559	0.448672	hsa05217
TGF-beta signaling pathway	2/92	0.0231	0.669	0.174574		Bacterial invasion of epithelial cells	74	0.1882	10.624	0.0149	0.4401	0.356449	hsa05100
Platelet activation	2/124	0.0401	0.93	0.0315171		Colorectal cancer	86	0.2188	9.142	0.0197	0.5361	0.270754	hsa05210
Osteoclast differentiation	2/128	0.0425	0.93	0.0315171		Platelet activation	123	0.3129	6.392	0.0383	0.8643	0.0633355	hsa04611
Phenylalanine metabolism	"1/17	0.0431	0.93	0.0315171		Pathways in cancer	526	1.3381	2.9894	0.0404	0.8643	0.0633355	hsa05200
Pathways in cancer	4/530	0.0439	0.93	0.0315171		Osteoclast differentiation	128	0.3256	6.1423	0.0412	0.8643	0.0633355	hsa04380
						Phenylalanine metabolism	17	0.0432	23.124	0.0424	0.8643	0.0633355	hsa00360

## Sheet: Reactome
NetworkAnalyst						WeWebGestalt								gprofiler
Name	Hits	Pval	AdjP	"-LOG(AdjP)		Description	Size	Expect	Ratio	P Value	FDR	"-log(FDR)		term_name	term_id	adjusted_p_value	negative_log10_of_adjusted_p_value	term_size	query_size	intersection_size	effective_domain_size	intersections
Degradation of collagen	8/61	3.49e-12	2.74e-09	8.56225		Keratan sulfate biosynthesis	28	0.0663	60.309	4.8249e-07	0	>50		ECM proteoglycans	REAC:R-HSA-3000178	3.62147e-22	21.4411	76	25	14	10478	Q9BXN1,P21810,P02461,P20908,P12109,P08123,P12110,P12111,Q06828,P02751,P51884,P24821,P01137,P13611
Collagen biosynthesis and modifying enzymes	8/62	4e-12	2.74e-09	8.56225		Extracellular matrix organization	301	0.713	22.44	0	0	>50		Extracellular matrix organization	REAC:R-HSA-1474244	5.78406e-17	16.2378	299	25	16	10478	Q9BXN1,P21810,P02461,P20908,P12109,Q99715,Q05707,P08123,P12110,P12111,Q06828,P02751,P51884,P24821,P01137,P13611
Extracellular matrix organization	10/157	5.86e-12	2.74e-09	8.56225		Diseases of glycosylation	138	0.3269	18.355	6.4698e-07	0	>50		Collagen chain trimerization	REAC:R-HSA-8948216	1.39106e-11	10.8567	44	25	8	10478	P02461,P20908,P12109,Q99715,Q05707,P08123,P12110,P12111
Degradation of the extracellular matrix	8/77	2.43e-11	8.52e-09	8.06956		MET activates PTK2 signaling	30	0.0711	56.288	6.4374e-07	0	>50		Integrin cell surface interactions	REAC:R-HSA-216083	4.45622e-11	10.351	84	25	9	10478	P02461,P20908,P12109,P08123,P12110,P12111,P02751,P51884,P24821
Collagen formation	8/85	5.49e-11	1.54e-08	7.81248		ECM proteoglycans	76	0.18	77.766	0	0	>50		Assembly of collagen fibrils and other multimeric structures	REAC:R-HSA-2022090	1.96219e-10	9.70726	60	25	8	10478	P02461,P20908,P12109,Q99715,Q05707,P08123,P12110,P12111
Assembly of collagen fibrils and other multimeric structures	6/54	7.48e-09	1.75e-06	5.75696		Glycosaminoglycan metabolism	124	0.2937	20.427	3.4365e-07	0	>50		Collagen degradation	REAC:R-HSA-1442490	3.37478e-10	9.47176	64	25	8	10478	P02461,P20908,P12109,Q99715,Q05707,P08123,P12110,P12111
Keratan sulfate degradation	"4/12	2.85e-08	5.72e-06	5.2426		NCAM signaling for neurite out-growth	63	0.1492	33.505	3.1251e-07	0	>50		Collagen biosynthesis and modifying enzymes	REAC:R-HSA-1650814	4.95146e-10	9.30527	67	25	8	10478	P02461,P20908,P12109,Q99715,Q05707,P08123,P12110,P12111
NCAM1 interactions	5/39	7.58e-08	1.33e-05	4.87615		Signaling by PDGF	58	0.1374	36.393	2.0535e-07	0	>50		Degradation of the extracellular matrix	REAC:R-HSA-1474228	4.9047e-09	8.30939	140	25	9	10478	P02461,P20908,P12109,Q99715,Q05707,P08123,P12110,P12111,P02751
Glycosaminoglycan metabolism	6/118	8.49e-07	5.67e-05	4.24642		Collagen chain trimerization	44	0.1042	76.756	4.774e-14	2.7498e-11	10.5607		Collagen formation	REAC:R-HSA-1474290	5.19306e-09	8.28458	89	25	8	10478	P02461,P20908,P12109,Q99715,Q05707,P08123,P12110,P12111
MPS VI - Maroteaux-Lamy syndrome	6/118	8.49e-07	5.67e-05	4.24642		Integrin cell surface interactions	85	0.2013	44.699	1.6986e-13	7.3381e-11	10.1344		Syndecan interactions	REAC:R-HSA-3000170	7.59462e-09	8.11949	27	25	6	10478	P02461,P20908,P08123,P02751,P24821,P01137
Mucopolysaccharidoses	6/118	8.49e-07	5.67e-05	4.24642		Assembly of collagen fibrils and other multimeric structures	61	0.1445	55.365	7.7516e-13	2.6789e-10	9.57204		Diseases associated with glycosaminoglycan metabolism	REAC:R-HSA-3560782	1.12872e-07	6.94741	41	25	6	10478	P21810,Q06828,P51884,P20774,P51888,P13611
MPS IX - Natowicz syndrome	6/118	8.49e-07	5.67e-05	4.24642		Collagen degradation	64	0.1516	52.77	1.1601e-12	3.341e-10	9.47612		Defective B4GALT1 causes B4GALT1-CDG (CDG-2d)	REAC:R-HSA-3656244	4.81554e-07	6.31736	8	25	4	10478	Q06828,P51884,P20774,P51888
MPS IIIB - Sanfilippo syndrome B	6/118	8.49e-07	5.67e-05	4.24642		Collagen biosynthesis and modifying enzymes	67	0.1587	50.407	1.7021e-12	4.2017e-10	9.37657		Defective ST3GAL3 causes MCT12 and EIEE15	REAC:R-HSA-3656243	4.81554e-07	6.31736	8	25	4	10478	Q06828,P51884,P20774,P51888
MPS I - Hurler syndrome	6/118	8.49e-07	5.67e-05	4.24642		Degradation of the extracellular matrix	140	0.3316	27.139	1.675e-11	3.6181e-09	8.44152		Defective CHST6 causes MCDC1	REAC:R-HSA-3656225	4.81554e-07	6.31736	8	25	4	10478	Q06828,P51884,P20774,P51888
MPS II - Hunter syndrome	6/118	8.49e-07	5.67e-05	4.24642		Collagen formation	90	0.2132	37.525	1.9569e-11	3.7573e-09	8.42512		Non-integrin membrane-ECM interactions	REAC:R-HSA-3000171	1.09976e-06	5.9587	59	25	6	10478	P02461,P20908,P08123,P02751,P24821,P01137
MPS VII - Sly syndrome	6/118	8.49e-07	5.67e-05	4.24642		Syndecan interactions	27	0.064	93.813	2.6477e-11	4.5753e-09	8.33958		Keratan sulfate degradation	REAC:R-HSA-2022857	4.8794e-06	5.31163	13	25	4	10478	Q06828,P51884,P20774,P51888
MPS IV - Morquio syndrome A	6/118	8.49e-07	5.67e-05	4.24642		Diseases associated with glycosaminoglycan metabolism	41	0.0971	61.779	3.9357e-10	6.1826e-08	7.20883		NCAM1 interactions	REAC:R-HSA-419037	1.11325e-05	4.95341	42	25	5	10478	P02461,P20908,P12109,P12110,P12111
MPS IIIC - Sanfilippo syndrome C	6/118	8.49e-07	5.67e-05	4.24642		Defective B4GALT1 causes B4GALT1-CDG (CDG-2d)	8	0.019	211.08	1.703e-09	2.102e-07	6.67737		Signaling by PDGF	REAC:R-HSA-186797	4.45915e-05	4.35075	55	25	5	10478	P02461,P20908,P12109,P12110,P12111
MPS IV - Morquio syndrome B	6/118	8.49e-07	5.67e-05	4.24642		Defective ST3GAL3 causes MCT12 and EIEE15	8	0.019	211.08	1.703e-09	2.102e-07	6.67737		NCAM signaling for neurite out-growth	REAC:R-HSA-375165	6.94505e-05	4.15832	60	25	5	10478	P02461,P20908,P12109,P12110,P12111
MPS IIIA - Sanfilippo syndrome A	6/118	8.49e-07	5.67e-05	4.24642		Defective CHST6 causes MCDC1	8	0.019	211.08	1.703e-09	2.102e-07	6.67737		Glycosaminoglycan metabolism	REAC:R-HSA-1630316	9.38454e-05	4.02759	123	25	6	10478	P21810,Q06828,P51884,P20774,P51888,P13611
MPS IIID - Sanfilippo syndrome D	6/118	8.49e-07	5.67e-05	4.24642		Non-integrin membrane-ECM interactions	59	0.1398	42.931	3.8355e-09	4.4185e-07	6.35473		Keratan sulfate biosynthesis	REAC:R-HSA-2022854	0.000136403	3.86517	28	25	4	10478	Q06828,P51884,P20774,P51888
Keratan sulfate biosynthesis	"4-27	9.83e-07	6.27e-05	4.20273		Keratan sulfate degradation	13	0.0308	129.9	1.7257e-08	1.8637e-06	5.72962		Diseases of glycosylation	REAC:R-HSA-3781865	0.000177564	3.75065	137	25	6	10478	P21810,Q06828,P51884,P20774,P51888,P13611
NCAM signaling for neurite out-growth	5/65	1.04e-06	6.32e-05	4.19928		NCAM1 interactions	42	0.0995	50.257	3.9101e-08	3.9745e-06	5.40072		MET activates PTK2 signaling	REAC:R-HSA-8874081	0.000181985	3.73996	30	25	4	10478	P02461,P20908,P08123,P02751
Keratan sulfate/keratin metabolism	4/32	2e-06	0.000117	3.93181		Keratan sulfate/keratin metabolism	34	0.0805	49.666	1.0824e-06	0.0001	4		Keratan sulfate/keratin metabolism	REAC:R-HSA-1638074	0.000305992	3.51429	34	25	4	10478	Q06828,P51884,P20774,P51888
Metabolism of carbohydrates	6/258	7.71e-05	0.00432	2.36452		MET promotes cell motility	41	0.0971	41.186	2.3375e-06	0.0002	3.69897		MET promotes cell motility	REAC:R-HSA-8875878	0.000597216	3.22387	40	25	4	10478	P02461,P20908,P08123,P02751
Signaling by PDGF	5/189	0.000189	0.0102	1.9914		Signaling by Receptor Tyrosine Kinases	455	1.0778	7.4226	6.3464e-06	0.0004	3.39794		Signaling by Receptor Tyrosine Kinases	REAC:R-HSA-9006934	0.0014107	2.85057	439	25	8	10478	P35222,P02461,P20908,P12109,P08123,P12110,P12111,P02751
Dermatan sulfate biosynthesis	"2/10	0.000378	0.0196	1.70774		Metabolism of carbohydrates	275	0.6514	9.2108	0	0.0021	2.67778		Metabolism of carbohydrates	REAC:R-HSA-71387	0.0082	2.08619	266	25	6	10478	P21810,Q06828,P51884,P20774,P51888,P13611
CS/DS degradation	"2/14	0.000759	0.038	1.42022		Signaling by MET	79	0.1871	21.375	0	0.0021	2.67778		Signaling by MET	REAC:R-HSA-6806834	0.00833312	2.07919	77	25	4	10478	P02461,P20908,P08123,P02751
Developmental Biology	6/417	0.00105	0.0506			Disease	1054	2.4967	4.0053	0.0001	0.0045	2.34679		Disease	REAC:R-HSA-1643685	0.0164865	1.78287	1018	25	10	10478	P21810,P35222,O94907,Q06828,P02751,P51884,P20774,P51888,P01137,P13611
Axon guidance	5/292	0.00139	0.0651			Defective CHST3 causes SEDCJD	8	0.019	105.54	0.0001	0.0081	2.09151		Defective CHST14 causes EDS, musculocontractural type	REAC:R-HSA-3595174	0.0416751	1.38012	8	25	2	10478	P21810,P13611
Integrin cell surface interactions	3/85	0.00194	0.0878			Defective CHST14 causes EDS, musculocontractural type	8	0.019	105.54	0.0001	0.0081	2.09151		Defective CHST3 causes SEDCJD	REAC:R-HSA-3595172	0.0416751	1.38012	8	25	2	10478	P21810,P13611
Chondroitin sulfate biosynthesis	"2/23	0.00208	0.091			Defective CHSY1 causes TPBS	8	0.019	105.54	0.0001	0.0081	2.09151		Defective CHSY1 causes TPBS	REAC:R-HSA-3595177	0.0416751	1.38012	8	25	2	10478	P21810,P13611
A tetrasaccharide linker sequence is required for GAG synthesis	"2/27	0.00286	0.122			Dermatan sulfate biosynthesis	11	0.0261	76.756	0.0003	0.0153	1.81531
Disease	8/945	0.00406	0.167			CS/DS degradation	14	0.0332	60.309	0.0005	0.0245	1.61083
Molecules associated with elastic fibres	2/38	0.00562	0.225			Scavenging by Class A Receptors	19	0.045	44.438	0.0009	0.0442	1.35458
Influenza Virus Induced Apoptosis	"1/2	0.00598	0.233			Defective B4GALT7 causes EDS, progeroid type	20	0.0474	42.216	0.001	0.0442	1.35458
Elastic fibre formation	2/45	0.00781	0.296			Defective B3GAT3 causes JDSSDHD	20	0.0474	42.216	0.001	0.0442	1.35458
Fibronectin matrix formation	"1/3	0.00896	0.331			Defective B3GALT6 causes EDSP2 and SEMDJL1	20	0.0474	42.216	0.001	0.0442	1.35458
Chondroitin sulfate/dermatan sulfate metabolism	2/53	0.0107	0.385			Chondroitin sulfate biosynthesis	20	0.0474	42.216	0.001	0.0442	1.35458
Heparan sulfate/heparin (HS-GAG) metabolism	2/56	0.0119	0.418
Signal Transduction	10/1690	0.0149	0.497
Host Interactions with Influenza Factors	"1/5	0.0149	0.497
Platelet activation, signaling and aggregation	3/220	0.0266	0.867
Platelet degranulation	2/89	0.0286	0.91
Response to elevated platelet cytosolic Ca2+	2/94	0.0316	0.985
Crosslinking of collagen fibrils	"1/11	0.0325	0.99
Cell surface interactions at the vascular wall	2/99	0.0348	1
Platelet Adhesion to exposed collagen	"1/12	0.0354	1
Apoptotic cleavage of cell adhesion proteins	"1/13	0.0383	1
Beta-catenin phosphorylation cascade	"1/15	0.044	1
Anchoring fibril formation	"1/15	0.044	1
GRB2:SOS provides linkage to MAPK signaling for Intergrins	"1/15	0.044	1
p130Cas linkage to MAPK signaling for integrins	"1/15	0.044	1
TGF-beta receptor signaling in EMT (epithelial to mesenchymal transition)	"1/17	0.0498	1

## Sheet: Wikipathway
WeWebGestalt									gprofiler
Gene Set	Description	Size	Expect	Ratio	P Value	FDR	"-log(FDR)		term_name	term_id	adjusted_p_value	negative_log10_of_adjusted_p_value	term_size	query_size	intersection_size	effective_domain_size		intersections
WP2911	miRNA targets in ECM and membrane receptors	43	0.1171	59.792	8.1417e-12	3.5661e-09	8.44781		miRNA targets in ECM and membrane receptors	WP:WP2911	5.41498e-10	9.2664	43	17	7	6376	P02461,P20908,P12109,P08123,P12110,P12111,P02751
WP3859	TGF-B Signaling in Thyroid Cells for Epithelial-Mesenchymal Transition	18	0.049	61.216	0	0.0023	2.63827		TGF-B Signaling in Thyroid Cells for Epithelial-Mesenchymal Transition	WP:WP3859	0.000964325	3.01578	18	17	3	6376	P02751,P24821,P01137
WP3967	miR-509-3p alteration of YAP1/ECM axis	19	0.0517	57.994	0	0.0023	2.63827		miR-509-3p alteration of YAP1/ECM axis	WP:WP3967	0.00114325	2.94186	19	17	3	6376	P02461,P20908,P02751
WP453	Inflammatory Response Pathway	33	0.0898	33.39	0.0001	0.0076	2.11919		Hair Follicle Development: Cytodifferentiation (Part 3 of 3)	WP:WP2840	0.00540786	2.26697	88	17	4	6376	P35222,O94907,P48436,P01137
WP2840	Hair Follicle Development: Cytodifferentiation (Part 3 of 3)	88	0.2396	16.695	0.0001	0.0076	2.11919		Inflammatory Response Pathway	WP:WP453	0.00629017	2.20134	33	17	3	6376	P02461,P08123,P02751
WP3932	Focal Adhesion-PI3K-Akt-mTOR-signaling pathway	309	0.8413	7.1319	0.0001	0.008	2.09691		Focal Adhesion-PI3K-Akt-mTOR-signaling pathway	WP:WP3932	0.00732802	2.13501	308	17	6	6376	P02461,P20908,P08123,P12110,P02751,P24821
WP306	Focal Adhesion	202	0.55	9.0914	0.0002	0.0095	2.02228		Focal Adhesion	WP:WP306	0.0101074	1.99536	200	17	5	6376	P35222,P08123,P12110,P02751,P24821
WP4172	PI3K-Akt Signaling Pathway	345	0.9393	6.3877	0.0002	0.011	1.95861		PI3K-Akt Signaling Pathway	WP:WP4172	0.0131022	1.88265	342	17	6	6376	P12109,P08123,P12110,P12111,P02751,P24821
WP366	TGF-beta Signaling Pathway	133	0.3621	11.046	0.0004	0.0184	1.73518		TGF-beta Signaling Pathway	WP:WP366	0.0268298	1.57138	133	17	4	6376	P08123,P02751,P24821,P01137
WP3876	BMP2-WNT4-FOXO1 Pathway in Human Primary Endometrial Stromal Cell Differentiation	13	0.0354	56.507	0.0005	0.0234	1.63078		BMP2-WNT4-FOXO1 Pathway in Human Primary Endometrial Stromal Cell Differentiation	WP:WP3876	0.0394633	1.40381	13	17	2	6376	P35222,O94907
WP474	Endochondral Ossification	65	0.177	16.952	0.0007	0.0263	1.58004		Endochondral Ossification	WP:WP474	0.0456389	1.34066	64	17	3	6376	P48436,P10071,P01137
WP3678	Amplification and Expansion of Oncogenic Pathways as Metastatic Traits	17	0.0463	43.211	0.0009	0.0325	1.48812
WP2572	Primary Focal Segmental Glomerulosclerosis FSGS	74	0.2015	14.89	0.001	0.0325	1.48812
WP3670	Simplified Interaction Map Between LOXL4 and Oxidative Stress Pathway	21	0.0572	34.98	0.0014	0.0445	1.35164

## Sheet: HP
gprofiler
term_name	term_id	adjusted_p_value	negative_log10_of_adjusted_p_value	term_size	query_size	intersection_size	effective_domain_size
miRNA targets in ECM and membrane receptors	WP:WP2911	5.41498e-10	9.2664	43	17	7	6376	P02461,P20908,P12109,P08123,P12110,P12111,P02751
TGF-B Signaling in Thyroid Cells for EMT	WP:WP3859	0.000964325	3.01578	18	17	3	6376	P02751,P24821,P01137
miR-509-3p alteration of YAP1/ECM axis	WP:WP3967	0.00114325	2.94186	19	17	3	6376	P02461,P20908,P02751
Hair Follicle Development: Cytodifferentiation	WP:WP2840	0.00540786	2.26697	88	17	4	6376	P35222,O94907,P48436,P01137
Inflammatory Response Pathway	WP:WP453	0.00629017	2.20134	33	17	3	6376	P02461,P08123,P02751
Focal Adhesion-PI3K-Akt-mTOR-signaling pathway	WP:WP3932	0.00732802	2.13501	308	17	6	6376	P02461,P20908,P08123,P12110,P02751,P24821
Focal Adhesion	WP:WP306	0.0101074	1.99536	200	17	5	6376	P35222,P08123,P12110,P02751,P24821
PI3K-Akt Signaling Pathway	WP:WP4172	0.0131022	1.88265	342	17	6	6376	P12109,P08123,P12110,P12111,P02751,P24821
TGF-beta Signaling Pathway	WP:WP366	0.0268298	1.57138	133	17	4	6376	P08123,P02751,P24821,P01137
BMP2-WNT4-FOXO1 Pathway in Human Primary Endometrial Stromal Cell Differentiation	WP:WP3876	0.0394633	1.40381	13	17	2	6376	P35222,O94907
Endochondral Ossification	WP:WP474	0.0456389	1.34066	64	17	3	6376	P48436,P10071,P01137

## Sheet: GO
NetworkAnalyst						gprofiler															NetworkAnalyst
GO-BP						GO-BP															GO-BP
Name	Hits	Pval	AdjP	"-LOG(AdjP)		term_name	term_id	adjusted_p_value	negative_log10_of_adjusted_p_value	term_size	query_size	intersection_size	effective_domain_size	intersections							Name	Hits	Pval	AdjP	"-LOG(AdjP)
Extracellular structure organization	13/242	5.85e-17	4.8e-14	13.3188		extracellular matrix organization	GO:0030198	8.73854e-23	22.0586	350	29	19	17622	P21810,P02461,P20908,P12109,Q99715,Q05707,P08123,P12110,P12111,Q06828,P02751,P51884,Q15063,Q7Z7G0,P24821,Q15582,P48436,P01137,P13611							Cell adhesion	12/629	2.66e-10	5.15e-08	7.28819
Cell morphogenesis involved in differentiation	13/827	3.84e-10	1.57e-07	6.8041		extracellular structure organization	GO:0043062	1.38618e-21	20.8582	404	29	19	17622	P21810,P02461,P20908,P12109,Q99715,Q05707,P08123,P12110,P12111,Q06828,P02751,P51884,Q15063,Q7Z7G0,P24821,Q15582,P48436,P01137,P13611							Skeletal system development	7/147	6.83e-09	6.62e-07	6.17914
Skeletal system development	10/459	3.56e-09	9.72e-07	6.01233		skeletal system development	GO:0001501	1.87318e-14	13.7274	513	29	16	17622	P35222,P02461,P12109,Q99715,Q05707,P08123,P12110,P12111,P35453,P51884,Q15063,P51888,Q15582,P48436,P10071,P01137							Mammary gland development	3/35	3.72e-05	0.00241	2.61798
Sulfur compound biosynthetic process	7/155	8.54e-09	1.75e-06	5.75696		chondrocyte differentiation	GO:0002062	4.09525e-12	11.3877	118	29	10	17622	P35222,P12109,Q99715,Q05707,P12110,P12111,Q15582,P48436,P10071,P01137							Heart development	5/240	7.24e-05	0.00351	2.45469
Anatomical structure formation involved in morphogenesis	16/2090	5.12e-08	8.4e-06	5.07572		connective tissue development	GO:0061448	8.74143e-12	11.0584	267	29	12	17622	P35222,P20908,P12109,Q99715,Q05707,P12110,P12111,P51884,Q15582,P48436,P10071,P01137							Cell_matrix adhesion	3/91	0.000645	0.025	1.60206
Tissue morphogenesis	9/566	3.85e-07	5.26e-05	4.27901		cartilage development	GO:0051216	2.52764e-11	10.5973	208	29	11	17622	P35222,P12109,Q99715,Q05707,P12110,P12111,P51884,Q15582,P48436,P10071,P01137							Endoderm development	2/30	0.00144	0.0466	1.33161
Cell development	14/1840	7.17e-07	8.39e-05	4.07624		animal organ morphogenesis	GO:0009887	2.99157e-11	10.5241	1002	29	17	17622	Q9BXN1,P35222,P02461,P20908,P12109,Q99715,Q05707,P08123,P12110,P12111,O94907,Q14192,P35453,P24821,P48436,P10071,P01137							Negative regulation of apoptotic process	5/577	0.00391	0.108	0.966576
Sulfur compound metabolic process	7/313	1.04e-06	0.000107	3.97062		cell adhesion	GO:0007155	3.35294e-10	9.47457	1387	29	18	17622	P35222,P02461,P20908,P12109,Q99715,Q05707,P12110,P12111,P02751,Q16853,Q15063,Q7Z7G0,P24821,Q15582,P48436,P10071,P01137,P13611							Pattern specification process	2/67	0.00703	0.163	0.787812
Heart development	8/487	1.56e-06	0.000142	3.84771		biological adhesion	GO:0022610	3.70208e-10	9.43155	1395	29	18	17622	P35222,P02461,P20908,P12109,Q99715,Q05707,P12110,P12111,P02751,Q16853,Q15063,Q7Z7G0,P24821,Q15582,P48436,P10071,P01137,P13611							Regulation of binding	"1/4	0.00755	0.163	0.787812
Neurogenesis	12/1390	1.82e-06	0.000149	3.82681		tissue morphogenesis	GO:0048729	3.71133e-10	9.43047	624	29	14	17622	P35222,P02461,P20908,P12109,Q99715,Q05707,P12110,P12111,O94907,P35453,P24821,P48436,P10071,P01137							Dorsal/ventral axis specification	"1/9	0.0169	0.328	0.484126
Anatomical structure morphogenesis	16/2820	3.46e-06	0.000255	3.59346		tissue development	GO:0009888	6.39097e-10	9.19443	1980	29	20	17622	Q9BXN1,P35222,P02461,P20908,P12109,Q99715,Q05707,P12110,P12111,O94907,P02751,Q14192,P35453,P51884,Q15063,P24821,Q15582,P48436,P10071,P01137							Cell recognition	"1/11	0.0206	0.364	0.438899
Organ morphogenesis	10/966	3.73e-06	0.000255	3.59346		collagen fibril organization	GO:0030199	3.04941e-09	8.51578	51	29	7	17622	P02461,P20908,Q99715,Q05707,P08123,Q06828,P51884							Ectoderm development	"1/14	0.0262	0.391	0.407823
Axon guidance	7/394	4.81e-06	0.000303	3.51856		chondrocyte differentiation involved in endochondral bone morphogenesis	GO:0003413	9.79971e-09	8.00879	29	29	6	17622	P12109,Q99715,Q05707,P12110,P12111,P48436							Cellular process	"1/14	0.0262	0.391	0.407823
Axonogenesis	8/578	5.59e-06	0.000328	3.48413		glycosaminoglycan catabolic process	GO:0006027	1.27983e-08	7.89285	62	29	7	17622	P21810,Q06828,P51884,P20774,P51888,P01137,P13611							Anterior/posterior axis specification	"1/16	0.0299	0.414	0.383
Generation of neurons	11/1300	7.46e-06	0.000408	3.38934		bone morphogenesis	GO:0060349	1.69735e-08	7.77023	114	29	8	17622	P12109,Q99715,Q05707,P12110,P12111,P48436,P10071,P01137							Cell proliferation	3/386	0.0351	0.451	0.345823
Morphogenesis of an epithelium	7/440	9.91e-06	0.000508	3.29414		developmental growth	GO:0048589	1.98066e-08	7.70319	664	29	13	17622	P35222,P12109,Q99715,Q05707,P12110,P12111,P02751,P35453,Q15063,P24821,P48436,P10071,P01137							Phosphate_containing compound metabolic process	"1/20	0.0372	0.451	0.345823
System development	20/4950	1.29e-05	0.000601	3.22113		aminoglycan catabolic process	GO:0006026	2.01784e-08	7.69511	66	29	7	17622	P21810,Q06828,P51884,P20774,P51888,P01137,P13611
Tissue development	12/1680	1.37e-05	0.000601	3.22113		endoderm development	GO:0007492	5.09221e-08	7.29309	75	29	7	17622	P35222,P20908,P12109,Q99715,O94907,P02751,P01137
Gland development	6/303	1.39e-05	0.000601	3.22113		chondrocyte morphogenesis involved in endochondral bone morphogenesis	GO:0003414	1.31182e-07	6.88212	18	29	5	17622	P12109,Q99715,Q05707,P12110,P12111
Epidermis development	6/319	1.87e-05	0.000765	3.11634		chondrocyte morphogenesis	GO:0090171	1.31182e-07	6.88212	18	29	5	17622	P12109,Q99715,Q05707,P12110,P12111
Nervous system development	13/2190	3.67e-05	0.00143	2.84466		growth plate cartilage chondrocyte morphogenesis	GO:0003429	1.31182e-07	6.88212	18	29	5	17622	P12109,Q99715,Q05707,P12110,P12111
Muscle cell differentiation	6/363	3.86e-05	0.00144	2.84164		anatomical structure morphogenesis	GO:0009653	1.34391e-07	6.87163	2631	29	20	17622	Q9BXN1,P35222,P02461,P20908,P12109,Q99715,Q05707,P08123,P12110,P12111,O94907,P02751,Q14192,P35453,Q15063,P24821,Q15582,P48436,P10071,P01137
Myoblast differentiation	3/44	6.74e-05	0.00232	2.63451		chondrocyte development	GO:0002063	1.43201e-07	6.84405	44	29	6	17622	P12109,Q99715,Q05707,P12110,P12111,P48436
Neuron projection development	8/816	6.8e-05	0.00232	2.63451		endodermal cell differentiation	GO:0035987	1.65047e-07	6.78239	45	29	6	17622	P35222,P20908,P12109,Q99715,O94907,P02751
Protein complex assembly	8/861	9.92e-05	0.00326	2.48678		growth plate cartilage morphogenesis	GO:0003422	1.77831e-07	6.74999	19	29	5	17622	P12109,Q99715,Q05707,P12110,P12111
Vasculature development	7/652	0.000123	0.00387	2.41229		cartilage development involved in endochondral bone morphogenesis	GO:0060351	2.17093e-07	6.66335	47	29	6	17622	P12109,Q99715,Q05707,P12110,P12111,P48436
Multicellular organismal development	20/5720	0.000144	0.00438	2.35853		skeletal system morphogenesis	GO:0048705	2.26772e-07	6.64441	243	29	9	17622	P35222,P12109,Q99715,Q05707,P12110,P12111,P48436,P10071,P01137
Neuron differentiation	9/1190	0.000155	0.00453	2.3439		endoderm formation	GO:0001706	3.20201e-07	6.49458	50	29	6	17622	P35222,P20908,P12109,Q99715,O94907,P02751
Neuron development	8/945	0.00019	0.00537	2.27003		chondrocyte development involved in endochondral bone morphogenesis	GO:0003433	5.12273e-07	6.2905	23	29	5	17622	P12109,Q99715,Q05707,P12110,P12111
Anatomical structure development	20/5830	0.000199	0.00544	2.2644		sulfur compound catabolic process	GO:0044273	5.18095e-07	6.28559	54	29	6	17622	P21810,Q06828,P51884,P20774,P51888,P13611
Proteoglycan biosynthetic process	3/68	0.000248	0.00656	2.1831		ossification	GO:0001503	5.50999e-07	6.25885	384	29	10	17622	Q9BXN1,P35222,P12109,O94907,Q14192,P24821,P48436,P10071,P01137,P13611
Gliogenesis	4/176	0.000269	0.0069	2.16115		glycosaminoglycan biosynthetic process	GO:0006024	6.04336e-07	6.21872	106	29	7	17622	P21810,Q06828,P51884,P20774,P51888,P01137,P13611
Striated muscle tissue development	5/354	0.000389	0.00966	2.01502		growth plate cartilage chondrocyte differentiation	GO:0003418	6.46346e-07	6.18953	24	29	5	17622	P12109,Q99715,Q05707,P12110,P12111
Cell migration	8/1050	0.000401	0.00968	2.01412		mucopolysaccharide metabolic process	GO:1903510	7.85671e-07	6.10476	110	29	7	17622	P21810,Q06828,P51884,P20774,P51888,P01137,P13611
Skeletal muscle tissue development	4/197	0.000413	0.00968	2.01412		aminoglycan biosynthetic process	GO:0006023	8.37634e-07	6.07695	111	29	7	17622	P21810,Q06828,P51884,P20774,P51888,P01137,P13611
Macromolecule catabolic process	8/1070	0.000447	0.00992	2.00349		cartilage morphogenesis	GO:0060536	1.79564e-06	5.74578	29	29	5	17622	P12109,Q99715,Q05707,P12110,P12111
Macromolecule catabolic process	8/1070	0.000447	0.00992	2.00349		bone development	GO:0060348	2.36933e-06	5.62537	211	29	8	17622	P12109,Q99715,Q05707,P12110,P12111,P48436,P10071,P01137
Negative regulation of immune system process	4/207	0.000498	0.0108	1.96658		endochondral bone morphogenesis	GO:0060350	3.07153e-06	5.51264	72	29	6	17622	P12109,Q99715,Q05707,P12110,P12111,P48436
Transmembrane receptor protein serine/threonine kinase signaling pathway	5/388	0.000591	0.0122	1.91364		growth	GO:0040007	3.34275e-06	5.4759	1005	29	13	17622	P35222,P12109,Q99715,Q05707,P12110,P12111,P02751,P35453,Q15063,P24821,P48436,P10071,P01137
Muscle organ development	5/389	0.000598	0.0122	1.91364		keratan sulfate catabolic process	GO:0042340	5.37137e-06	5.26991	12	29	4	17622	Q06828,P51884,P20774,P51888
Macromolecular complex assembly	8/1120	0.000612	0.0122	1.91364		growth plate cartilage development	GO:0003417	5.65517e-06	5.24755	36	29	5	17622	P12109,Q99715,Q05707,P12110,P12111
Organ development	14/3290	0.000636	0.0122	1.91364		glycosaminoglycan metabolic process	GO:0030203	9.55132e-06	5.01994	157	29	7	17622	P21810,Q06828,P51884,P20774,P51888,P01137,P13611
Transforming growth factor beta receptor signaling pathway	4/221	0.000637	0.0122	1.91364		system development	GO:0048731	1.42914e-05	4.84492	4801	29	23	17622	Q9BXN1,P35222,P02461,P20908,P12109,Q99715,Q05707,P08123,P12110,P12111,O94907,P02751,Q14192,P35453,P51884,Q15063,P51888,P24821,Q15582,P48436,P10071,P01137,P13611
Epithelial to mesenchymal transition	3/96	0.000683	0.0127	1.8962		endochondral bone growth	GO:0003416	1.43253e-05	4.8439	43	29	5	17622	P12109,Q99715,Q05707,P12110,P12111
Response to chemical stimulus	15/3830	0.000865	0.0157	1.8041		aminoglycan metabolic process	GO:0006022	1.46752e-05	4.83342	167	29	7	17622	P21810,Q06828,P51884,P20774,P51888,P01137,P13611
Cell_substrate adhesion	4/241	0.000881	0.0157	1.8041		response to growth factor	GO:0070848	1.7994e-05	4.74487	728	29	11	17622	Q9BXN1,P35222,P02461,P08123,O94907,Q06828,P51884,Q15063,P24821,P48436,P01137
Response to external stimulus	9/1510	0.000943	0.0164	1.78516		bone growth	GO:0098868	1.81408e-05	4.74134	45	29	5	17622	P12109,Q99715,Q05707,P12110,P12111
Cell fate commitment	4/254	0.00107	0.0183	1.73755		animal organ development	GO:0048513	2.51448e-05	4.59955	3502	29	20	17622	Q9BXN1,P35222,P02461,P20908,P12109,Q99715,Q05707,P08123,P12110,P12111,O94907,P02751,Q14192,P35453,P51884,P24821,Q15582,P48436,P10071,P01137
Proteoglycan metabolic process	3/117	0.00121	0.0203	1.6925		prostate gland development	GO:0030850	2.53379e-05	4.59623	48	29	5	17622	P35222,P35453,P24821,P48436,P10071
Cell_cell adhesion	5/461	0.00128	0.021	1.67778		carbohydrate derivative catabolic process	GO:1901136	3.2129e-05	4.4931	187	29	7	17622	P21810,Q06828,P51884,P20774,P51888,P01137,P13611
Positive regulation of epithelial cell proliferation	3/120	0.0013	0.021	1.67778		embryonic morphogenesis	GO:0048598	3.5373e-05	4.45133	592	29	10	17622	P35222,P20908,P12109,Q99715,O94907,P02751,P35453,P48436,P10071,P01137
Regulation of anatomical structure morphogenesis	6/702	0.00136	0.0215	1.66756		branch elongation of an epithelium	GO:0060602	5.20988e-05	4.28317	20	29	4	17622	P35453,P24821,P48436,P01137
Tissue remodeling	3/126	0.0015	0.0232	1.63451		formation of primary germ layer	GO:0001704	6.80439e-05	4.16721	120	29	6	17622	P35222,P20908,P12109,Q99715,O94907,P02751
Sensory organ development	5/485	0.00161	0.0244	1.61261		odontogenesis	GO:0042476	9.11303e-05	4.04034	126	29	6	17622	Q9BXN1,P35222,P08123,P24821,P10071,P01137
Developmental growth	4/290	0.00175	0.026	1.58503		multicellular organism development	GO:0007275	0.000129879	3.88646	5339	29	23	17622	Q9BXN1,P35222,P02461,P20908,P12109,Q99715,Q05707,P08123,P12110,P12111,O94907,P02751,Q14192,P35453,P51884,Q15063,P51888,P24821,Q15582,P48436,P10071,P01137,P13611
Regulation of cell adhesion	4/294	0.00184	0.0269	1.57025		developmental growth involved in morphogenesis	GO:0060560	0.000137324	3.86225	231	29	7	17622	P35222,P02751,P35453,Q15063,P24821,P48436,P01137
Carbohydrate metabolic process	7/1040	0.00204	0.0294	1.53165		cellular response to transforming growth factor beta stimulus	GO:0071560	0.000178297	3.74886	240	29	7	17622	Q9BXN1,P02461,P08123,Q06828,Q15063,P48436,P01137
Response to endogenous stimulus	8/1360	0.0022	0.0311	1.50724		response to transforming growth factor beta	GO:0071559	0.000216916	3.66371	247	29	7	17622	Q9BXN1,P02461,P08123,Q06828,Q15063,P48436,P01137
Negative regulation of cell differentiation	5/540	0.00258	0.0358	1.44612		keratan sulfate biosynthetic process	GO:0018146	0.000218178	3.66119	28	29	4	17622	Q06828,P51884,P20774,P51888
Positive regulation of transcription from RNA polymerase II promoter	6/800	0.00265	0.0362	1.44129		cell morphogenesis involved in differentiation	GO:0000904	0.000241115	3.61778	726	29	10	17622	P35222,P12109,Q99715,Q05707,P12110,P12111,O94907,P02751,Q15063,P10071
Negative regulation of transcription from RNA polymerase II promoter	5/552	0.00283	0.0381	1.41908		axis elongation	GO:0003401	0.000334145	3.47606	31	29	4	17622	P35453,P24821,P48436,P01137
Cell_matrix adhesion	3/159	0.00291	0.0385	1.41454		cell development	GO:0048468	0.000395808	3.40252	2111	29	15	17622	P35222,P02461,P12109,Q99715,Q05707,P12110,P12111,O94907,P02751,Q14192,Q15063,P24821,P48436,P10071,P01137
Cellular component assembly	9/1790	0.00314	0.0409	1.38828		keratan sulfate metabolic process	GO:0042339	0.000433567	3.36294	33	29	4	17622	Q06828,P51884,P20774,P51888
Tube morphogenesis	4/347	0.00335	0.0429	1.36754		anatomical structure development	GO:0048856	0.00073955	3.13103	5813	29	23	17622	Q9BXN1,P35222,P02461,P20908,P12109,Q99715,Q05707,P08123,P12110,P12111,O94907,P02751,Q14192,P35453,P51884,Q15063,P51888,P24821,Q15582,P48436,P10071,P01137,P13611
Embryonic morphogenesis	5/581	0.00353	0.0442	1.35458		gastrulation	GO:0007369	0.000806943	3.09316	182	29	6	17622	P35222,P20908,P12109,Q99715,O94907,P02751
Regionalization	4/353	0.00356	0.0442	1.35458		morphogenesis of a branching epithelium	GO:0061138	0.000833359	3.07917	183	29	6	17622	P35222,P35453,P24821,P48436,P10071,P01137
Negative regulation of cell proliferation	5/585	0.00364	0.0445	1.35164		sulfur compound biosynthetic process	GO:0044272	0.000888324	3.05143	185	29	6	17622	P21810,Q06828,P51884,P20774,P51888,P13611
Protein oligomerization	4/357	0.00371	0.0447	1.34969		response to endogenous stimulus	GO:0009719	0.00117189	2.93111	1645	29	13	17622	Q9BXN1,P35222,P02461,P12109,P08123,O94907,Q06828,Q14192,P35453,Q15063,P24821,P48436,P01137
Enzyme linked receptor protein signaling pathway	7/1180	0.00408	0.0485	1.31426		morphogenesis of a branching structure	GO:0001763	0.00132293	2.87846	198	29	6	17622	P35222,P35453,P24821,P48436,P10071,P01137
T cell differentiation	3/186	0.00453	0.053	1.27572		organ growth	GO:0035265	0.00140309	2.85292	200	29	6	17622	P12109,Q99715,Q05707,P12110,P12111,P48436
Bone remodeling	2/63	0.00581	0.0669	1.17457		cellular response to endogenous stimulus	GO:0071495	0.00145295	2.83775	1386	29	12	17622	Q9BXN1,P35222,P02461,P12109,P08123,O94907,Q06828,Q14192,Q15063,P24821,P48436,P01137
Positive regulation of transcription, DNA_dependent	7/1260	0.00595	0.0669	1.17457		morphogenesis of an epithelium	GO:0002009	0.00160392	2.79482	490	29	8	17622	P35222,P20908,O94907,P35453,P24821,P48436,P10071,P01137
Positive regulation of transcription, DNA_dependent	7/1260	0.00595	0.0669	1.17457		regulation of animal organ morphogenesis	GO:2000027	0.00181473	2.74119	209	29	6	17622	Q9BXN1,P35222,O94907,P35453,P48436,P01137
Regulation of transcription from RNA polymerase II promoter	8/1610	0.00614	0.068	1.16749		circulatory system development	GO:0072359	0.00188769	2.72407	1151	29	11	17622	P35222,P02461,P20908,P08123,O94907,P02751,Q14192,Q15582,P48436,P10071,P01137
Cell activation	6/960	0.00652	0.0706	1.1512		anatomical structure formation involved in morphogenesis	GO:0048646	0.00205658	2.68685	1161	29	11	17622	P35222,P20908,P12109,Q99715,O94907,P02751,Q14192,Q15582,P48436,P10071,P01137
Androgen receptor signaling pathway	2/67	0.00655	0.0706	1.1512		cellular response to growth factor stimulus	GO:0071363	0.00209751	2.6783	699	29	9	17622	Q9BXN1,P35222,P02461,P08123,O94907,Q06828,Q15063,P48436,P01137
Negative regulation of developmental process	5/674	0.00663	0.0706	1.1512		protein heterotrimerization	GO:0070208	0.0020989	2.67801	13	29	3	17622	P12109,P08123,P12110
Negative regulation of transcription, DNA_dependent	6/987	0.00745	0.077	1.11351		osteoblast differentiation	GO:0001649	0.00219919	2.65774	216	29	6	17622	P35222,P12109,Q14192,P24821,P10071,P13611
Negative regulation of transcription, DNA_dependent	6/987	0.00745	0.077	1.11351		developmental process	GO:0032502	0.00275439	2.55997	6205	29	23	17622	Q9BXN1,P35222,P02461,P20908,P12109,Q99715,Q05707,P08123,P12110,P12111,O94907,P02751,Q14192,P35453,P51884,Q15063,P51888,P24821,Q15582,P48436,P10071,P01137,P13611
Response to wounding	7/1310	0.00752	0.077	1.11351		gland morphogenesis	GO:0022612	0.00281976	2.54979	122	29	5	17622	P35453,P24821,P48436,P10071,P01137
Wound healing	5/700	0.00776	0.0786	1.10458		embryo development	GO:0009790	0.00366245	2.43623	976	29	10	17622	P35222,P20908,P12109,Q99715,O94907,P02751,P35453,P48436,P10071,P01137
Regulation of neurogenesis	4/444	0.00799	0.0799	1.09745		wound healing	GO:0042060	0.00396917	2.4013	553	29	8	17622	P02461,P20908,P08123,P02751,Q15063,P24821,P10071,P01137
Positive regulation of RNA metabolic process	7/1330	0.00815	0.0806	1.09366		digestive tract development	GO:0048565	0.00400707	2.39717	131	29	5	17622	P35222,P02461,P35453,P10071,P01137
Negative regulation of RNA metabolic process	6/1020	0.00887	0.0866	1.06248		regulation of morphogenesis of a branching structure	GO:0060688	0.00407277	2.39011	57	29	4	17622	P35222,P35453,P48436,P01137
Response to organic substance	10/2500	0.00922	0.0889	1.0511		protein-containing complex subunit organization	GO:0043933	0.00409591	2.38765	2167	29	14	17622	P35222,P02461,P20908,P12109,Q99715,Q05707,P08123,P12110,O94907,Q06828,P02751,P51884,P48436,P01137
Development of primary sexual characteristics	3/246	0.00978	0.0933	1.03012		regulation of morphogenesis of an epithelium	GO:1905330	0.00447993	2.34873	134	29	5	17622	P35222,O94907,P35453,P48436,P01137
Lymphocyte differentiation	3/260	0.0114	0.107	0.970616		cell morphogenesis	GO:0000902	0.00460255	2.337	1001	29	10	17622	P35222,P12109,Q99715,Q05707,P12110,P12111,O94907,P02751,Q15063,P10071
Embryo development	6/1080	0.0116	0.107	0.970616		heart development	GO:0007507	0.00490794	2.3091	569	29	8	17622	P35222,P02461,P20908,O94907,Q14192,P48436,P10071,P01137
Organic acid metabolic process	7/1430	0.0118	0.107	0.970616		branching involved in ureteric bud morphogenesis	GO:0001658	0.00501069	2.3001	60	29	4	17622	P35222,P48436,P10071,P01137
Regulation of cell proliferation	7/1430	0.0118	0.107	0.970616		heart morphogenesis	GO:0003007	0.00563039	2.24946	254	29	6	17622	P35222,P20908,O94907,Q14192,P48436,P01137
Pattern specification process	4/503	0.0123	0.11	0.958607		digestive system development	GO:0055123	0.00616685	2.20994	143	29	5	17622	P35222,P02461,P35453,P10071,P01137
Positive regulation of cell proliferation	5/786	0.0125	0.11	0.958607		cellular developmental process	GO:0048869	0.00616962	2.20974	4306	29	19	17622	P35222,P02461,P20908,P12109,Q99715,Q05707,P12110,P12111,O94907,P02751,Q14192,Q15063,P51888,P24821,Q15582,P48436,P10071,P01137,P13611
Tube development	4/506	0.0125	0.11	0.958607		ureteric bud morphogenesis	GO:0060675	0.00691752	2.16005	65	29	4	17622	P35222,P48436,P10071,P01137
Negative regulation of cell adhesion	2/96	0.0131	0.114	0.943095		regulation of cartilage development	GO:0061035	0.00735545	2.13339	66	29	4	17622	P35222,P48436,P10071,P01137
Regulation of T cell activation	3/279	0.0137	0.119	0.924453		mesonephric tubule morphogenesis	GO:0072171	0.00735545	2.13339	66	29	4	17622	P35222,P48436,P10071,P01137
Negative regulation of nucleobase_containing compound metabolic process	6/1130	0.0141	0.121	0.917215		appendage morphogenesis	GO:0035107	0.00754392	2.1224	149	29	5	17622	P35222,O94907,P35453,P48436,P10071
Positive regulation of developmental process	5/817	0.0146	0.123	0.910095		limb morphogenesis	GO:0035108	0.00754392	2.1224	149	29	5	17622	P35222,O94907,P35453,P48436,P10071
Positive regulation of nucleobase_containing compound metabolic process	7/1490	0.0147	0.123	0.910095		branching morphogenesis of an epithelial tube	GO:0048754	0.00805296	2.09404	151	29	5	17622	P35222,P24821,P48436,P10071,P01137
Cell proliferation	8/1900	0.0166	0.137	0.863279		cellular component morphogenesis	GO:0032989	0.0107201	1.9698	1100	29	10	17622	P35222,P12109,Q99715,Q05707,P12110,P12111,O94907,P02751,Q15063,P10071
Intracellular steroid hormone receptor signaling pathway	2/113	0.0178	0.145	0.838632		nephron tubule morphogenesis	GO:0072078	0.0116367	1.93417	74	29	4	17622	P35222,P48436,P10071,P01137
Transcription from RNA polymerase II promoter	8/1930	0.0179	0.145	0.838632		nephron epithelium morphogenesis	GO:0072088	0.0129458	1.88787	76	29	4	17622	P35222,P48436,P10071,P01137
Blood coagulation	4/564	0.018	0.145	0.838632		renal tubule morphogenesis	GO:0061333	0.0143606	1.84283	78	29	4	17622	P35222,P48436,P10071,P01137
Coagulation	4/568	0.0184	0.146	0.835647		nephron morphogenesis	GO:0072028	0.0143606	1.84283	78	29	4	17622	P35222,P48436,P10071,P01137
Hemostasis	4/570	0.0186	0.146	0.835647		response to organic substance	GO:0010033	0.0145526	1.83706	3189	29	16	17622	Q9BXN1,P35222,P02461,P12109,P08123,P12110,O94907,Q06828,P02751,Q14192,P35453,P51884,Q15063,P24821,P48436,P01137
Positive regulation of cell differentiation	4/571	0.0188	0.146	0.835647		negative regulation of biomineral tissue development	GO:0070168	0.014674	1.83345	24	29	3	17622	Q9BXN1,P48436,P01137
Regulation of T cell proliferation	2/120	0.0199	0.154	0.812479		response to wounding	GO:0009611	0.0155049	1.80953	665	29	8	17622	P02461,P20908,P08123,P02751,Q15063,P24821,P10071,P01137
Negative regulation of cellular biosynthetic process	6/1220	0.0201	0.154	0.812479		regulation of cell adhesion	GO:0030155	0.016558	1.78099	671	29	8	17622	P02751,Q15063,Q7Z7G0,P24821,Q15582,P48436,P10071,P01137
Regulation of chromosome organization	2/122	0.0206	0.155	0.809668		limb development	GO:0060173	0.0174737	1.75762	177	29	5	17622	P35222,O94907,P35453,P48436,P10071
Regulation of cell morphogenesis	3/325	0.0206	0.155	0.809668		appendage development	GO:0048736	0.0174737	1.75762	177	29	5	17622	P35222,O94907,P35453,P48436,P10071
Negative regulation of biosynthetic process	6/1240	0.0216	0.161	0.793174		cell differentiation	GO:0030154	0.0181247	1.74173	4127	29	18	17622	P35222,P02461,P20908,P12109,Q99715,Q05707,P12110,P12111,O94907,P02751,Q14192,Q15063,P24821,Q15582,P48436,P10071,P01137,P13611
Regulation of endocytosis	2/128	0.0225	0.166	0.779892		tube morphogenesis	GO:0035239	0.0185744	1.73109	912	29	9	17622	P35222,P02461,P02751,P35453,P24821,Q15582,P48436,P10071,P01137
Regulation of protein import into nucleus	2/137	0.0255	0.187	0.728158		prostate gland epithelium morphogenesis	GO:0060740	0.0188083	1.72565	26	29	3	17622	P35453,P24821,P48436
Regulation of lymphocyte activation	3/360	0.0269	0.195	0.709965		negative regulation of embryonic development	GO:0045992	0.0188083	1.72565	26	29	3	17622	P35222,P20908,O94907
Negative regulation of response to stimulus	5/967	0.0281	0.202	0.694649		multicellular organismal process	GO:0032501	0.0188638	1.72437	7484	29	24	17622	Q9BXN1,P21810,P35222,P02461,P20908,P12109,Q99715,Q05707,P08123,P12110,P12111,O94907,P02751,Q14192,P35453,P51884,Q15063,P51888,P24821,Q15582,P48436,P10071,P01137,P13611
Positive regulation of multicellular organismal process	4/649	0.0285	0.203	0.692504		positive regulation of animal organ morphogenesis	GO:0110110	0.0192934	1.71459	84	29	4	17622	P35222,O94907,P48436,P01137
T cell proliferation	2/147	0.0291	0.206	0.686133		cellular component organization	GO:0016043	0.0193245	1.71389	6243	29	22	17622	P21810,P35222,P02461,P20908,P12109,Q99715,Q05707,P08123,P12110,P12111,O94907,Q06828,P02751,P51884,Q15063,Q7Z7G0,P24821,Q15582,P48436,P10071,P01137,P13611
Myeloid leukocyte differentiation	2/153	0.0313	0.219	0.659556		cell fate specification	GO:0001708	0.0202232	1.69415	85	29	4	17622	P35222,O94907,P48436,P10071
Negative regulation of apoptotic process	4/679	0.0329	0.226	0.645892		urogenital system development	GO:0001655	0.0227057	1.64387	324	29	6	17622	P35222,P35453,P24821,P48436,P10071,P01137
Negative regulation of apoptotic process	4/679	0.0329	0.226	0.645892		negative regulation of cell development	GO:0010721	0.0231066	1.63626	325	29	6	17622	P35222,P02461,Q15063,P48436,P10071,P01137
Regulation of body fluid levels	4/680	0.033	0.226	0.645892		oligodendrocyte differentiation	GO:0048709	0.0232113	1.6343	88	29	4	17622	P35222,P48436,P10071,P01137
						prostate gland morphogenesis	GO:0060512	0.0236461	1.62624	28	29	3	17622	P35453,P24821,P48436
						cell surface receptor signaling pathway involved in heart development	GO:0061311	0.0236461	1.62624	28	29	3	17622	P35222,O94907,P01137
						carbohydrate derivative biosynthetic process	GO:1901137	0.0244892	1.61102	708	29	8	17622	P21810,P35222,Q06828,P51884,P20774,P51888,P01137,P13611
						transforming growth factor beta receptor signaling pathway	GO:0007179	0.0246355	1.60844	190	29	5	17622	Q9BXN1,P02461,P08123,Q06828,P01137
						epithelial tube branching involved in lung morphogenesis	GO:0060441	0.0263453	1.5793	29	29	3	17622	P35222,P24821,P48436
						regulation of ossification	GO:0030278	0.027246	1.5647	194	29	5	17622	P35222,O94907,P48436,P10071,P01137
						negative regulation of cell differentiation	GO:0045596	0.0285157	1.54492	723	29	8	17622	P35222,P02461,P20908,O94907,Q15063,P48436,P10071,P01137
						nephron tubule development	GO:0072080	0.028898	1.53913	93	29	4	17622	P35222,P48436,P10071,P01137
						frontal suture morphogenesis	GO:0060364	0.0289961	1.53766	4	29	2	17622	P10071,P01137
						regulation of neuroblast proliferation	GO:1902692	0.0292402	1.53402	30	29	3	17622	P35222,P10071,P01137
						kidney morphogenesis	GO:0060993	0.0301481	1.52074	94	29	4	17622	P35222,P48436,P10071,P01137
						transmembrane receptor protein serine/threonine kinase signaling pathway	GO:0007178	0.0303437	1.51793	341	29	6	17622	Q9BXN1,P02461,P08123,O94907,Q06828,P01137
						cellular component organization or biogenesis	GO:0071840	0.0320534	1.49413	6417	29	22	17622	P21810,P35222,P02461,P20908,P12109,Q99715,Q05707,P08123,P12110,P12111,O94907,Q06828,P02751,P51884,Q15063,Q7Z7G0,P24821,Q15582,P48436,P10071,P01137,P13611
						response to acid chemical	GO:0001101	0.032413	1.48928	345	29	6	17622	P02461,P12109,P08123,O94907,P24821,P48436
						renal tubule development	GO:0061326	0.0327672	1.48456	96	29	4	17622	P35222,P48436,P10071,P01137
						ureteric bud development	GO:0001657	0.0341377	1.46677	97	29	4	17622	P35222,P48436,P10071,P01137
						mesonephric epithelium development	GO:0072163	0.03555	1.44916	98	29	4	17622	P35222,P48436,P10071,P01137
						mesonephric tubule development	GO:0072164	0.03555	1.44916	98	29	4	17622	P35222,P48436,P10071,P01137
						response to mechanical stimulus	GO:0009612	0.0390153	1.40877	209	29	5	17622	P02461,Q15063,P24821,P48436,P01137
						developmental induction	GO:0031128	0.039164	1.40711	33	29	3	17622	P35222,O94907,P48436
						positive regulation of morphogenesis of an epithelium	GO:1905332	0.039164	1.40711	33	29	3	17622	P35222,P48436,P01137
						blood vessel development	GO:0001568	0.0393803	1.40472	756	29	8	17622	P35222,P02461,P20908,P08123,P02751,Q15582,P10071,P01137
						mesonephros development	GO:0001823	0.0416323	1.38057	102	29	4	17622	P35222,P48436,P10071,P01137
						sulfur compound metabolic process	GO:0006790	0.0425219	1.37139	362	29	6	17622	P21810,Q06828,P51884,P20774,P51888,P13611
						cellular response to acid chemical	GO:0071229	0.0427384	1.36918	213	29	5	17622	P02461,P12109,P08123,P24821,P48436
						specification of animal organ identity	GO:0010092	0.0429066	1.36748	34	29	3	17622	P35222,O94907,P10071
						negative regulation of developmental process	GO:0051093	0.0437879	1.35865	1015	29	9	17622	Q9BXN1,P35222,P02461,P20908,O94907,Q15063,P48436,P10071,P01137
						response to oxygen-containing compound	GO:1901700	0.0471374	1.32663	1605	29	11	17622	P35222,P02461,P12109,P08123,P12110,O94907,P35453,Q15063,P24821,P48436,P01137
						regulation of endodermal cell differentiation	GO:1903224	0.0482775	1.31626	5	29	2	17622	P20908,O94907
						positive regulation of extracellular matrix assembly	GO:1901203	0.0482775	1.31626	5	29	2	17622	P48436,P01137
MF						MF															MF
Name	Hits	Pval	AdjP			source	term_name	term_id	adjusted_p_value	negative_log10_of_adjusted_p_value	term_size	query_size	intersection_size	effective_domain_size							Name	Hits	Pval	AdjP
Extracellular matrix structural constituent	10/80	4.52e-17	1.75e-14	13.757		extracellular matrix structural constituent	GO:0005201	2.62265e-33	32.5813	155	28	20	17516	Q9BXN1,P21810,P02461,P20908,P12109,Q99715,Q05707,P08123,P12110,P12111,Q06828,P02751,P51884,P20774,Q15063,P51888,Q7Z7G0,P24821,Q15582,P13611							Extracellular matrix structural constituent	11/124	5.28e-18	1.02e-15	14.9914
Structural molecule activity	11/666	4.43e-09	8.6e-07	6.0655		structural molecule activity	GO:0005198	1.25197e-18	17.9024	809	28	20	17516	Q9BXN1,P21810,P02461,P20908,P12109,Q99715,Q05707,P08123,P12110,P12111,Q06828,P02751,P51884,P20774,Q15063,P51888,Q7Z7G0,P24821,Q15582,P13611							Growth factor activity	3/165	0.00168	0.163	0.787812
Glycosaminoglycan binding	6/178	4.62e-07	5.98e-05	4.2233		extracellular matrix structural constituent conferring tensile strength	GO:0030020	1.95226e-13	12.7095	37	28	8	17516	P02461,P20908,P12109,Q99715,Q05707,P08123,P12110,P12111							Chromatin binding	4/413	0.00271	0.175	0.756962
Collagen binding	4/47	1.17e-06	0.000114	3.9431		extracellular matrix structural constituent conferring compression resistance	GO:0030021	7.28952e-13	12.1373	22	28	7	17516	Q9BXN1,P21810,Q06828,P51884,P20774,P51888,P13611							Antigen binding	43487	0.0314	1	0
Growth factor binding	4/125	5.82e-05	0.00438	2.35853		collagen binding	GO:0005518	3.53801e-07	6.45124	68	28	6	17516	Q9BXN1,Q05707,P02751,P51884,Q7Z7G0,Q15582							DNA_binding transcription factor activity	4/903	0.0389	1	0
Heparin binding	4/130	6.78e-05	0.00438	2.35853		platelet-derived growth factor binding	GO:0048407	9.42039e-07	6.02593	12	28	4	17516	P02461,P20908,P12109,P08123							Transforming growth factor beta receptor binding	1/41	0.0578	1	0
SMAD binding	3/68	0.000212	0.0117	1.93181		glycosaminoglycan binding	GO:0005539	1.87521e-05	4.72695	226	28	7	17516	P21810,P20908,P02751,Q15063,P51888,Q7Z7G0,P13611							Serine_type endopeptidase inhibitor activity	1/93	0.127	1	0
Integrin binding	3/86	0.000423	0.0205	1.68825		heparin binding	GO:0008201	0.00187748	2.72643	161	28	5	17516	P20908,P02751,Q15063,P51888,Q7Z7G0							Protein binding	17/9580	0.132	1	0
Receptor binding	9/1590	0.000916	0.0395	1.4034		protein-containing complex binding	GO:0044877	0.0100945	1.99591	1070	28	9	17516	Q9BXN1,P02461,P20908,Q05707,P02751,P51884,Q7Z7G0,Q15582,P10071							Peptidase inhibitor activity	1/121	0.162	1	0
Protein binding, bridging	3/135	0.00157	0.0609	1.21538		sulfur compound binding	GO:1901681	0.0124295	1.90554	238	28	5	17516	P20908,P02751,Q15063,P51888,Q7Z7G0							Carbohydrate binding	1/212	0.266	1	0
Binding, bridging	3/148	0.00204	0.072	1.14267		integrin binding	GO:0005178	0.0173367	1.76103	127	28	4	17516	P02461,P20908,P02751,Q15582
Chromatin binding	4/338	0.0025	0.0755	1.12205		growth factor binding	GO:0019838	0.023302	1.63261	137	28	4	17516	P02461,P20908,P12109,P08123
Protein complex binding	4/339	0.00253	0.0755	1.12205		cell adhesion molecule binding	GO:0050839	0.0376916	1.42376	489	28	6	17516	P35222,P02461,P20908,P02751,Q15063,Q15582
Growth factor activity	3/170	0.00302	0.0838	1.07676
Positive regulation of transcription, DNA_dependent	7/1260	0.00436	0.113	0.946922
Negative regulation of transcription, DNA_dependent	6/987	0.00569	0.138	0.860121
Steroid hormone receptor binding	2/69	0.00625	0.143	0.844664
Transcription from RNA polymerase II promoter	8/1930	0.0129	0.279	0.554396
Nuclear hormone receptor binding	2/153	0.0284	0.58	0.236572
Hormone receptor binding	2/176	0.0367	0.712	0.14752
CC						CC															CC
Name	Hits	Pval	AdjP			source	term_name	term_id	adjusted_p_value	negative_log10_of_adjusted_p_value	term_size	query_size	intersection_size	effective_domain_size							Name	Hits	Pval	AdjP
Proteinaceous extracellular matrix	19/398	5.59e-26	1.26e-23	22.8996		collagen-containing extracellular matrix	GO:0062023	6.35558e-29	28.1968	330	29	21	18745	Q9BXN1,P21810,P02461,P20908,P12109,Q99715,Q05707,P08123,P12110,P12111,Q06828,P02751,P51884,P20774,Q15063,P51888,Q7Z7G0,P24821,Q15582,P01137,P13611							Extracellular matrix	18/300	7.66e-27	4.06e-25	24.3915
Extracellular matrix	19/570	5.48e-23	6.16e-21	20.2104		extracellular matrix	GO:0031012	3.10364e-25	24.5081	491	29	21	18745	Q9BXN1,P21810,P02461,P20908,P12109,Q99715,Q05707,P08123,P12110,P12111,Q06828,P02751,P51884,P20774,Q15063,P51888,Q7Z7G0,P24821,Q15582,P01137,P13611							Extracellular region	20/2280	1.07e-13	2.83e-12	11.5482
Extracellular region part	20/1320	1.19e-17	8.93e-16	15.0491		collagen trimer	GO:0005581	2.76319e-12	11.5586	94	29	9	18745	P02461,P20908,P12109,Q99715,Q05707,P08123,P12110,P12111,P51884							Extracellular space	18/1680	1.84e-13	3.24e-12	11.4895
Extracellular matrix part	11/204	4.63e-15	2.6e-13	12.585		endoplasmic reticulum lumen	GO:0005788	8.0946e-11	10.0918	298	29	11	18745	P02461,P20908,P12109,Q99715,Q05707,P08123,P12110,P12111,P02751,P24821,P13611							Microvillus	2/64	0.0038	0.0504	1.29757
Collagen	9/93	1.02e-14	4.58e-13	12.3391		extracellular region part	GO:0044421	1.0272e-10	9.98834	3694	29	24	18745	Q9BXN1,P21810,Q8IUL8,P35222,P02461,P20908,P12109,Q99715,Q05707,P08123,P12110,P12111,O94907,Q06828,P02751,P51884,P20774,Q15063,P51888,Q7Z7G0,P24821,Q15582,P01137,P13611							Protein_containing complex	4/656	0.0136	0.145	0.838632
Extracellular space	16/901	1.49e-14	5.57e-13	12.2541		extracellular space	GO:0005615	5.09007e-10	9.29328	3494	29	23	18745	P21810,Q8IUL8,P35222,P02461,P20908,P12109,Q99715,Q05707,P08123,P12110,P12111,O94907,Q06828,P02751,P51884,P20774,Q15063,P51888,Q7Z7G0,P24821,Q15582,P01137,P13611							Protein_DNA complex	1/44	0.0615	0.543	0.2652
Extracellular region	20/2860	3.63e-11	1.17e-09	8.93181		extracellular region	GO:0005576	8.06894e-09	8.09318	4475	29	24	18745	Q9BXN1,P21810,Q8IUL8,P35222,P02461,P20908,P12109,Q99715,Q05707,P08123,P12110,P12111,O94907,Q06828,P02751,P51884,P20774,Q15063,P51888,Q7Z7G0,P24821,Q15582,P01137,P13611							Apical part of cell	1/89	0.121	0.913	0.0395292
Endoplasmic reticulum lumen	8/175	1.67e-10	4.7e-09	8.3279		extracellular matrix component	GO:0044420	1.56761e-08	7.80476	46	29	6	18745	P02461,P20908,Q99715,Q05707,P08123,P51884							Bicellular tight junction	1/123	0.163	1	0
Organelle lumen	20/3380	8.69e-10	2.17e-08	7.66354		Golgi lumen	GO:0005796	3.34518e-08	7.47558	101	29	7	18745	P21810,Q06828,P51884,P20774,P51888,P01137,P13611							Cell projection	2/943	0.397	1	0
Membrane_enclosed lumen	20/3440	1.2e-09	2.7e-08	7.56864		fibrillar collagen trimer	GO:0005583	3.34672e-07	6.47538	11	29	4	18745	P02461,P20908,P08123,P51884							Cilium	1/354	0.402	1	0
Vacuolar part	6/279	3.62e-06	7.4e-05	4.13077		banded collagen fibril	GO:0098643	3.34672e-07	6.47538	11	29	4	18745	P02461,P20908,P08123,P51884
Membrane_bounded vesicle	9/1100	2.55e-05	0.000459	3.33819		lysosomal lumen	GO:0043202	1.29542e-06	5.88759	94	29	6	18745	P21810,Q06828,P51884,P20774,P51888,P13611
Lytic vacuole	6/401	2.86e-05	0.000459	3.33819		complex of collagen trimers	GO:0098644	3.89744e-06	5.40922	19	29	4	18745	P02461,P20908,P08123,P51884
Lysosome	6/401	2.86e-05	0.000459	3.33819		endomembrane system	GO:0012505	7.56736e-06	5.12106	4406	29	21	18745	P21810,P02461,P20908,P12109,Q99715,Q05707,P08123,P12110,P12111,O94907,Q06828,P02751,P51884,Q16853,P20774,Q15063,P51888,P24821,Q15582,P01137,P13611
Vesicle	9/1210	5.43e-05	0.000815	3.08884		vacuolar lumen	GO:0005775	4.66117e-05	4.33151	171	29	6	18745	P21810,Q06828,P51884,P20774,P51888,P13611
Vacuole	6/486	8.34e-05	0.00117	2.93181		membrane-enclosed lumen	GO:0031974	0.000188323	3.7251	5244	29	21	18745	P21810,P35222,P02461,P20908,P12109,Q99715,Q05707,P08123,P12110,P12111,Q06828,P02751,Q14192,P51884,P20774,P51888,P24821,P48436,P10071,P01137,P13611
Transport vesicle	4/158	9.87e-05	0.00131	2.88273		intracellular organelle lumen	GO:0070013	0.000188323	3.7251	5244	29	21	18745	P21810,P35222,P02461,P20908,P12109,Q99715,Q05707,P08123,P12110,P12111,Q06828,P02751,Q14192,P51884,P20774,P51888,P24821,P48436,P10071,P01137,P13611
Golgi apparatus part	7/761	0.000123	0.00154	2.81248		organelle lumen	GO:0043233	0.000188323	3.7251	5244	29	21	18745	P21810,P35222,P02461,P20908,P12109,Q99715,Q05707,P08123,P12110,P12111,Q06828,P02751,Q14192,P51884,P20774,P51888,P24821,P48436,P10071,P01137,P13611
Endoplasmic reticulum part	8/1060	0.00014	0.00166	2.77989		endoplasmic reticulum part	GO:0044432	0.000488772	3.31089	1324	29	11	18745	P02461,P20908,P12109,Q99715,Q05707,P08123,P12110,P12111,P02751,P24821,P13611
Basement membrane	3/100	0.000493	0.00554	2.25649		extracellular exosome	GO:0070062	0.00131615	2.88069	2131	29	13	18745	P21810,Q8IUL8,P35222,P12109,Q99715,P08123,P12110,P12111,P02751,P51884,P20774,P51888,Q15582
Endoplasmic reticulum	8/1660	0.00287	0.0307	1.51286		extracellular vesicle	GO:1903561	0.00147597	2.83092	2153	29	13	18745	P21810,Q8IUL8,P35222,P12109,Q99715,P08123,P12110,P12111,P02751,P51884,P20774,P51888,Q15582
Cytoplasmic membrane_bounded vesicle	6/1020	0.00419	0.0429	1.36754		extracellular organelle	GO:0043230	0.00149132	2.82643	2155	29	13	18745	P21810,Q8IUL8,P35222,P12109,Q99715,P08123,P12110,P12111,P02751,P51884,P20774,P51888,Q15582
Golgi apparatus	7/1400	0.00461	0.0451	1.34582		anchoring collagen complex	GO:0030934	0.00153241	2.81463	3	29	2	18745	Q99715,Q05707
Microvillus	2/70	0.00529	0.0496	1.30452		collagen beaded filament	GO:0098647	0.00153241	2.81463	3	29	2	18745	P12109,P12111
Cytoplasmic vesicle	6/1110	0.00622	0.056	1.25181		collagen type VI trimer	GO:0005589	0.00153241	2.81463	3	29	2	18745	P12109,P12111
Intracellular organelle part	20/8620	0.00751	0.065	1.18709		Golgi apparatus part	GO:0044431	0.00192511	2.71554	953	29	9	18745	P21810,Q06828,P51884,P20774,Q15063,P51888,Q15582,P01137,P13611
Organelle part	20/8790	0.01	0.0835	1.07831		endoplasmic reticulum	GO:0005783	0.00226223	2.64546	1881	29	12	18745	P02461,P20908,P12109,Q99715,Q05707,P08123,P12110,P12111,P02751,Q16853,P24821,P13611
Cell_substrate adherens junction	2/138	0.0194	0.156	0.806875		basement membrane	GO:0005604	0.00271285	2.56657	93	29	4	18745	P20908,P02751,P24821,Q15582
Cell_substrate junction	2/147	0.0219	0.17	0.769551		vacuolar part	GO:0044437	0.00367492	2.43475	553	29	7	18745	P21810,P12109,Q06828,P51884,P20774,P51888,P13611
Sarcomere	2/163	0.0265	0.199	0.701147		FACIT collagen trimer	GO:0005593	0.00763998	2.11691	6	29	2	18745	Q99715,Q05707
Contractile fiber part	2/187	0.0341	0.248	0.605548		vesicle	GO:0031982	0.00809361	2.09186	3811	29	16	18745	P21810,Q8IUL8,P35222,P12109,Q99715,P08123,P12110,P12111,O94907,P02751,P51884,Q16853,P20774,P51888,Q15582,P01137
Myofibril	2/197	0.0375	0.264	0.578396		sarcolemma	GO:0042383	0.0107688	1.96783	132	29	4	18745	P21810,P12109,P12110,P12111
Adherens junction	2/212	0.0428	0.288	0.540608		lysosome	GO:0005764	0.0117362	1.93047	663	29	7	18745	P21810,P12109,Q06828,P51884,P20774,P51888,P13611
Contractile fiber	2/214	0.0436	0.288	0.540608		lytic vacuole	GO:0000323	0.0118489	1.92632	664	29	7	18745	P21810,P12109,Q06828,P51884,P20774,P51888,P13611
Cell surface	3/518	0.0457	0.294	0.531653		Golgi apparatus	GO:0005794	0.0137726	1.86098	1536	29	10	18745	P21810,Q06828,P51884,Q16853,P20774,Q15063,P51888,Q15582,P01137,P13611
						supramolecular fiber	GO:0099512	0.0144658	1.83966	941	29	8	18745	P35222,P02461,P20908,P12109,P08123,P12111,Q14192,P51884
						supramolecular polymer	GO:0099081	0.0152426	1.81694	948	29	8	18745	P35222,P02461,P20908,P12109,P08123,P12111,Q14192,P51884
						supramolecular complex	GO:0099080	0.0153564	1.81371	949	29	8	18745	P35222,P02461,P20908,P12109,P08123,P12111,Q14192,P51884
						vacuole	GO:0005773	0.0279085	1.55426	761	29	7	18745	P21810,P12109,Q06828,P51884,P20774,P51888,P13611
						interstitial matrix	GO:0005614	0.0334228	1.47596	12	29	2	18745	Q7Z7G0,P24821
						intracellular organelle part	GO:0044446	0.0385385	1.4141	9164	29	24	18745	P21810,P35222,P02461,P20908,P12109,Q99715,Q05707,P08123,P12110,P12111,O94907,Q06828,P02751,Q14192,P51884,P20774,Q15063,P51888,P24821,Q15582,P48436,P10071,P01137,P13611

## Sheet: PPI
Id	Label	Degree	Betweenness	Expression
P02751	FN1	689	536555	0
P35222	CTNNB1	330	289080	0
Q14192	FHL2	75	61447.7	0
P01137	TGFB1	51	38938.6	0
P08123	COL1A2	26	16210.4	0
P10071	GLI3	23	16483.7	0
P13611	VCAN	18	16214.3	0
P48436	SOX9	18	8353.64	0
P0CG48	UBC	15	46745.9	NA
P12109	COL6A1	9	5358.98	0
P02461	COL3A1	9	3563.26	0
O94907	DKK1	8	6464.8	0
Q7Z7G0	ABI3BP	8	5800.08	0
P21810	BGN	8	4745.39	0
P20908	COL5A1	7	3699.85	0
P84022	SMAD3	6	3182.08	NA
P24821	TNC	6	2458.47	0
Q05707	COL14A1	6	408.09	0
P08047	SP1	5	5501.64	NA
P16220	CREB1	5	4691.79	NA
P20774	OGN	5	3499.03	0
P05067	APP	5	3278.8	NA
P35453	HOXD13	5	2368.55	0
P12110	COL6A2	5	2341.13	0
Q15796	SMAD2	5	2034.78	NA
P51888	PRELP	5	1528.78	0
P01106	MYC	4	9996.74	NA
Q13485	SMAD4	4	8239.93	NA
Q09472	EP300	4	8215.01	NA
Q99715	COL12A1	4	5762.3	0
P07996	THBS1	4	3927.67	NA
P49023	PXN	4	2280.87	NA
P20916	MAG	4	879.11	NA
Q13547	HDAC1	3	7834.51	NA
Q15717	ELAVL1	3	6907.4	NA
P00533	EGFR	3	6097.76	NA
Q99623	PHB2	3	6097.76	NA
P62258	YWHAE	3	5860.76	NA
P08107	HSPA1A	3	4986.38	NA
P18564	ITGB6	3	4889.7	NA
P07384	CAPN1	3	4022.1	NA
P98095	FBLN2	3	3377.62	NA
P16070	CD44	3	2770.09	NA
P02452	COL1A1	3	2109.14	NA
Q99972	MYOC	3	1929.03	NA
P18146	EGR1	3	1801.17	NA
P02458	COL2A1	3	1678.89	NA
P10275	AR	3	1263.53	NA
Q92793	CREBBP	3	1254.12	NA
P20849	COL9A1	3	1173.46	0
P10914	IRF1	3	973.94	NA
P07585	DCN	3	147.75	NA
P12111	COL6A3	3	16.2	0
O15198	SMAD9	2	3886.2	NA
P00519	ABL1	2	3804.19	NA
P98161	PKD1	2	3759.14	NA
P52272	HNRNPM	2	3759.14	NA
P22626	HNRNPA2B1	2	3759.14	NA
P05387	RPLP2	2	3759.14	NA
P62314	SNRPD1	2	3759.14	NA
P07195	LDHB	2	3759.14	NA
P17931	LGALS3	2	3759.14	NA
P15336	ATF2	2	3759.14	NA
O00182	LGALS9	2	3759.14	NA
P46778	RPL21	2	3759.14	NA
P24666	ACP1	2	3759.14	NA
P18206	VCL	2	3759.14	NA
O43707	ACTN4	2	3759.14	NA
Q08211	DHX9	2	3759.14	NA
P09874	PARP1	2	3759.14	NA
Q92499	DDX1	2	3759.14	NA
P17844	DDX5	2	3759.14	NA
Q15233	NONO	2	3759.14	NA
P38159	RBMX	2	3759.14	NA
P35637	FUS	2	3759.14	NA
P05412	JUN	2	3759.14	NA
P27348	YWHAQ	2	3759.14	NA
P10809	HSPD1	2	3759.14	NA
P11142	HSPA8	2	3759.14	NA
P08238	HSP90AB1	2	3759.14	NA
P09651	HNRNPA1	2	3759.14	NA
Q9Y230	RUVBL2	2	3759.14	NA
P02741	CRP	2	3759.14	NA
P11388	TOP2A	2	3759.14	NA
P63104	YWHAZ	2	3759.14	NA
P02545	LMNA	2	3759.14	NA
P09496	CLTA	2	3759.14	NA
Q9HB71	CACYBP	2	3759.14	NA
P46940	IQGAP1	2	3759.14	NA
P15311	EZR	2	3759.14	NA
P08865	RPSA	2	3759.14	NA
P07947	YES1	2	3759.14	NA
P61978	HNRNPK	2	3759.14	NA
P48061	CXCL12	2	2535.77	NA
P33993	MCM7	2	2338.62	NA
Q9UHX1	PUF60	2	2338.62	NA
Q8WZ42	TTN	2	2338.62	NA
P05556	ITGB1	2	2338.62	NA
P23246	SFPQ	2	2338.62	NA
Q9Y6W6	DUSP10	2	2338.62	NA
Q14324	MYBPC2	2	2314	NA
Q14103	HNRNPD	2	2217.91	NA
P42566	EPS15	2	2217.91	NA
P31483	TIA1	2	2217.91	NA
P40337	VHL	2	1823.94	NA
P15502	ELN	2	1669.24	NA
Q16586	SGCA	2	1669.24	NA
P62993	GRB2	2	1512.8	NA
Q9NR56	MBNL1	2	1512.8	NA
Q02447	SP3	2	1234.41	NA
P25208	NFYB	2	1234.41	NA
Q15582	TGFBI	2	1158	0
Q16853	AOC3	2	1158	0
O15105	SMAD7	2	930.36	NA
P37173	TGFBR2	2	930.36	NA
Q15910	EZH2	2	930.36	NA
Q14974	KPNB1	2	891.77	NA
Q9NRC8	SIRT7	2	878.96	NA
P98160	HSPG2	2	776.81	NA
P48729	CSNK1A1	2	772.04	NA
P17252	PRKCA	2	772.04	NA
Q9Y297	BTRC	2	772.04	NA
Q92769	HDAC2	2	697.59	NA
Q04206	RELA	2	697.59	NA
Q86VP6	CAND1	2	635.21	NA
Q13635	PTCH1	2	411.95	NA
P41235	HNF4A	2	335.47	NA
Q13285	NR5A1	2	335.47	NA
P04637	TP53	2	249.44	NA
P06733	ENO1	2	215.34	NA
P17301	ITGA2	2	210.17	NA
Q13950	RUNX2	2	93.53	NA
Q93074	MED12	2	76.87	NA
P09486	SPARC	2	9.58	NA
O75923	DYSF	2	7.5	NA
P30101	PDIA3	2	0	NA
P38398	BRCA1	2	0	NA
Q12778	FOXO1	2	0	NA
O95405	ZFYVE9	2	0	NA
P49810	PSEN2	2	0	NA
P03372	ESR1	2	0	NA
Q96EB6	SIRT1	2	0	NA
P31146	CORO1A	1	0	NA
P12830	CDH1	1	0	NA
Q8WVC0	LEO1	1	0	NA
P54253	ATXN1	1	0	NA
Q14526	HIC1	1	0	NA
P15884	TCF4	1	0	NA
O15169	AXIN1	1	0	NA
Q9BZE0	GLIS2	1	0	NA
O14920	IKBKB	1	0	NA
P27986	PIK3R1	1	0	NA
O00560	SDCBP	1	0	NA
Q9NP95	FGF20	1	0	NA
P10909	CLU	1	0	NA
Q9H6I2	SOX17	1	0	NA
P16150	SPN	1	0	NA
Q86UP0	CDH24	1	0	NA
P01100	FOS	1	0	NA
Q00534	CDK6	1	0	NA
Q96RT1	ERBB2IP	1	0	NA
Q9BV47	DUSP26	1	0	NA
P37023	ACVRL1	1	0	NA
P35813	PPM1A	1	0	NA
P11684	SCGB1A1	1	0	NA
P11912	CD79A	1	0	NA
Q13683	ITGA7	1	0	NA
P63279	UBE2I	1	0	NA
P26006	ITGA3	1	0	NA
Q9Y3M2	CBY1	1	0	NA
Q9NRA0	SPHK2	1	0	NA
Q9H2S9	IKZF4	1	0	NA
Q9H9D4	ZNF408	1	0	NA
Q92785	DPF2	1	0	NA
Q9UDV6	ZNF212	1	0	NA
P41240	CSK	1	0	NA
P17036	ZNF3	1	0	NA
P40763	STAT3	1	0	NA
P62877	RBX1	1	0	NA
P46108	CRK	1	0	NA
P12931	SRC	1	0	NA
P31749	AKT1	1	0	NA
P10145	IL8	1	0	NA
P02778	CXCL10	1	0	NA
P02776	PF4	1	0	NA
P28482	MAPK1	1	0	NA
P43694	GATA4	1	0	NA
P03971	AMH	1	0	NA
P08651	NFIC	1	0	NA
P10415	BCL2	1	0	NA
Q13761	RUNX3	1	0	NA
Q16827	PTPRO	1	0	NA
Q05209	PTPN12	1	0	NA
P01023	A2M	1	0	NA
Q16665	HIF1A	1	0	NA
Q08380	LGALS3BP	1	0	NA
P05107	ITGB2	1	0	NA
Q9UBZ9	REV1	1	0	NA
P11215	ITGAM	1	0	NA
Q9HCK8	CHD8	1	0	NA
Q9UBL3	ASH2L	1	0	NA
P07942	LAMB1	1	0	NA
O95996	APC2	1	0	NA
Q14689	DIP2A	1	0	NA
Q12841	FSTL1	1	0	NA
P35869	AHR	1	0	NA
P11473	VDR	1	0	NA
P06756	ITGAV	1	0	NA
O14617	AP3D1	1	0	NA
Q8TDN6	BRIX1	1	0	NA
Q9UPQ9	TNRC6B	1	0	NA
P39687	ANP32A	1	0	NA
P25940	COL5A3	1	0	NA
P05997	COL5A2	1	0	NA
Q14050	COL9A3	1	0	NA
P12980	LYL1	1	0	NA
Q13363	CTBP1	1	0	NA
O75717	WDHD1	1	0	NA
P08648	ITGA5	1	0	NA
P35555	FBN1	1	0	NA
Q02388	COL7A1	1	0	NA
P21980	TGM2	1	0	NA
P55285	CDH6	1	0	NA
P08237	PFKM	1	0	NA
P06732	CKM	1	0	NA
P04114	APOB	1	0	NA
Q13634	CDH18	1	0	NA
Q6EMK4	VASN	1	0	NA
P19022	CDH2	1	0	NA
Q13526	PIN1	1	0	NA
P48745	NOV	1	0	NA
P16473	TSHR	1	0	NA
Q14766	LTBP1	1	0	NA
Q01196	RUNX1	1	0	NA
P62942	FKBP1A	1	0	NA
P17936	IGFBP3	1	0	NA
P20742	PZP	1	0	NA
Q16820	MEP1B	1	0	NA
Q92831	KAT2B	1	0	NA
Q9ULB5	CDH7	1	0	NA
Q9Y4K3	TRAF6	1	0	NA
P26010	ITGB7	1	0	NA
P00750	PLAT	1	0	NA
P23142	FBLN1	1	0	NA
Q9ULB4	CDH9	1	0	NA
P34741	SDC2	1	0	NA
P00488	F13A1	1	0	NA
Q06141	REG3A	1	0	NA
Q01826	SATB1	1	0	NA
P61296	HAND2	1	0	NA
O75528	TADA3	1	0	NA
P09936	UCHL1	1	0	NA
Q96RU7	TRIB3	1	0	NA
O75444	MAF	1	0	NA
Q92930	RAB8B	1	0	NA
Q8WXH2	JPH3	1	0	NA
O75581	LRP6	1	0	NA
Q14112	NID2	1	0	NA
O14641	DVL2	1	0	NA
P08253	MMP2	1	0	NA
P53350	PLK1	1	0	NA
O15265	ATXN7	1	0	NA
Q14966	ZNF638	1	0	NA
Q16254	E2F4	1	0	NA
Q14574	DSC3	1	0	NA
O14594	NCAN	1	0	NA
Q9GZZ8	LACRT	1	0	NA
O14490	DLGAP1	1	0	NA
Q9Y490	TLN1	1	0	NA
P12757	SKIL	1	0	NA
P04278	SHBG	1	0	NA
P20823	HNF1A	1	0	NA
Q8TEK3	DOT1L	1	0	NA
Q96MU8	KREMEN1	1	0	NA
P04085	PDGFA	1	0	NA
Q08050	FOXM1	1	0	NA
P10276	RARA	1	0	NA
P52292	KPNA2	1	0	NA
O75582	RPS6KA5	1	0	NA
P04196	HRG	1	0	NA
Q15750	TAB1	1	0	NA
P42229	STAT5A	1	0	NA
Q9HAT8	PELI2	1	0	NA
Q8N726	CDKN2A	1	0	NA
P28749	RBL1	1	0	NA
P46937	YAP1	1	0	NA
Q9UI12	ATP6V1H	1	0	NA
Q9BZD6	PRRG4	1	0	NA
P27487	DPP4	1	0	NA
P11362	FGFR1	1	0	NA
Q15596	NCOA2	1	0	NA
Q9Y2G2	CARD8	1	0	NA
Q06265	EXOSC9	1	0	NA
O75364	PITX3	1	0	NA
Q53EV4	LRRC23	1	0	NA
P60568	IL2	1	0	NA
Q13618	CUL3	1	0	NA
Q86T24	ZBTB33	1	0	NA
O14907	TAX1BP3	1	0	NA
Q9NPB6	PARD6A	1	0	NA
Q86UL8	MAGI2	1	0	NA
Q8IUR7	ARMC8	1	0	NA
P49840	GSK3A	1	0	NA
O96028	WHSC1	1	0	NA
P29590	PML	1	0	NA
P42858	HTT	1	0	NA
Q8TDY2	RB1CC1	1	0	NA
P34947	GRK5	1	0	NA
Q9UBB4	ATXN10	1	0	NA
O15205	UBD	1	0	NA
Q9NRD1	FBXO6	1	0	NA
Q9BZK7	TBL1XR1	1	0	NA
P02511	CRYAB	1	0	NA
Q32MZ4	LRRFIP1	1	0	NA
P37198	NUP62	1	0	NA
Q13619	CUL4A	1	0	NA
P63146	UBE2B	1	0	NA
Q9NW38	FANCL	1	0	NA
P61956	SUMO2	1	0	NA
P52948	NUP98	1	0	NA
P49790	NUP153	1	0	NA
O43463	SUV39H1	1	0	NA
Q9P1Z2	CALCOCO1	1	0	NA
Q9BY41	HDAC8	1	0	NA
Q15004	KIAA0101	1	0	NA
P49917	LIG4	1	0	NA
Q6ZNA4	RNF111	1	0	NA
Q9BS26	ERP44	1	0	NA
Q99814	EPAS1	1	0	NA
P02768	ALB	1	0	NA
Q504Q3	PAN2	1	0	NA
P02647	APOA1	1	0	NA
P78396	CCNA1	1	0	NA
O94992	HEXIM1	1	0	NA
O75400	PRPF40A	1	0	NA
Q08345	DDR1	1	0	NA
Q9P2D1	CHD7	1	0	NA
P48431	SOX2	1	0	NA
P17948	FLT1	1	0	NA
O15392	BIRC5	1	0	NA
Q13620	CUL4B	1	0	NA
Q9Y371	SH3GLB1	1	0	NA
Q9NYF0	DACT1	1	0	NA
Q9UMX1	SUFU	1	0	NA
Q9NRP7	STK36	1	0	NA
Q9NQB0	TCF7L2	1	0	NA
P25054	APC	1	0	NA
Q9NSA3	CTNNBIP1	1	0	NA
Q99750	MDFI	1	0	NA
Q6P1J9	CDC73	1	0	NA
Q9NRI5	DISC1	1	0	NA
O00512	BCL9	1	0	NA
P63208	SKP1	1	0	NA
Q92597	NDRG1	1	0	NA
P50402	EMD	1	0	NA
P42166	TMPO	1	0	NA
P49841	GSK3B	1	0	NA
P35221	CTNNA1	1	0	NA
P36402	TCF7	1	0	NA
P29279	CTGF	1	0	NA
Q8TEW0	PARD3	1	0	NA
P08581	MET	1	0	NA
Q92729	PTPRU	1	0	NA
P42336	PIK3CA	1	0	NA
P49768	PSEN1	1	0	NA
Q9UKB5	AJAP1	1	0	NA
P15941	MUC1	1	0	NA
P04626	ERBB2	1	0	NA
P10586	PTPRF	1	0	NA
Q9UJU2	LEF1	1	0	NA
Q96NW7	LRRC7	1	0	NA
P24385	CCND1	1	0	NA
O75030	MITF	1	0	NA
P20265	POU3F2	1	0	NA
Q9BRK4	LZTS2	1	0	NA
P14679	TYR	1	0	NA
P17643	TYRP1	1	0	NA
Q8TEQ6	GEMIN5	1	0	NA
O94906	PRPF6	1	0	NA
Q9HD26	GOPC	1	0	NA
P18065	IGFBP2	1	0	NA
O00141	SGK1	1	0	NA
P68366	TUBA4A	1	0	NA
P20290	BTF3	1	0	NA
Q8NC51	SERBP1	1	0	NA
P60484	PTEN	1	0	NA
P19838	NFKB1	1	0	NA
P22415	USF1	1	0	NA
P51955	NEK2	1	0	NA
Q96CA5	BIRC7	1	0	NA
O14745	SLC9A3R1	1	0	NA
Q9UI14	RABAC1	1	0	NA
O15111	CHUK	1	0	NA
P18031	PTPN1	1	0	NA
Q14678	KANK1	1	0	NA
P24941	CDK2	1	0	NA
Q9Y3R0	GRIP1	1	0	NA
P07288	KLK3	1	0	NA
P01375	TNF	1	0	NA
Q15843	NEDD8	1	0	NA
Q13616	CUL1	1	0	NA
P17813	ENG	1	0	NA
Q92997	DVL3	1	0	NA
Q969Q1	TRIM63	1	0	NA
P49789	FHIT	1	0	NA
Q9Y265	RUVBL1	1	0	NA
P36897	TGFBR1	1	0	NA
Q03167	TGFBR3	1	0	NA
Q9NYA1	SPHK1	1	0	NA
Q9NQX6	ZNF331	1	0	NA
Q68DY1	ZNF626	1	0	NA
Q02535	ID3	1	0	NA
P18847	ATF3	1	0	NA
Q9UHR5	SAP30BP	1	0	NA
P31751	AKT2	1	0	NA
Q99697	PITX2	1	0	NA
P80098	CCL7	1	0	NA
P13500	CCL2	1	0	NA
P80075	CCL8	1	0	NA
P13501	CCL5	1	0	NA
P78556	CCL20	1	0	NA
P14316	IRF2	1	0	NA
P07766	CD3E	1	0	NA
P08151	GLI1	1	0	NA
P23511	NFYA	1	0	NA
Q13952	NFYC	1	0	NA
P14921	ETS1	1	0	NA
Q01543	FLI1	1	0	NA
P23467	PTPRB	1	0	NA
P08575	PTPRC	1	0	NA
Q12913	PTPRJ	1	0	NA
P23470	PTPRG	1	0	NA
O14965	AURKA	1	0	NA
P45983	MAPK8	1	0	NA
P45984	MAPK9	1	0	NA
P48382	RFX5	1	0	NA
O14593	RFXANK	1	0	NA
O75626	PRDM1	1	0	NA
P15692	VEGFA	1	0	NA
O00499	BIN1	1	0	NA
P56524	HDAC4	1	0	NA
P16403	HIST1H1C	1	0	NA
P50616	TOB1	1	0	NA
Q8TEY5	CREB3L4	1	0	NA
P12755	SKI	1	0	NA
Q93008	USP9X	1	0	NA
Q9UBN7	HDAC6	1	0	NA
Q86X55	CARM1	1	0	NA
O00458	IFRD1	1	0	NA
Q5JTC6	FAM123B	1	0	NA
P30260	CDC27	1	0	NA
Q8WUI4	HDAC7	1	0	NA
Q03164	MLL	1	0	NA
O14686	MLL2	1	0	NA
Q9UKB1	FBXW11	1	0	NA
Q15291	RBBP5	1	0	NA
Q9Y4A5	TRRAP	1	0	NA
O00255	MEN1	1	0	NA
O60264	SMARCA5	1	0	NA
Q7RTU7	SCXA	1	0	NA
O43524	FOXO3	1	0	NA
Q13873	BMPR2	1	0	NA
Q15038	DAZAP2	1	0	NA
P33151	CDH5	1	0	NA
Q96L91	EP400	1	0	NA
Q92830	KAT2A	1	0	NA
O75360	PROP1	1	0	NA
P98177	FOXO4	1	0	NA
O75937	DNAJC8	1	0	NA
Q9P287	BCCIP	1	0	NA
Q96B97	SH3KBP1	1	0	NA
P62945	RPL41	1	0	NA
Q2LD37	KIAA1109	1	0	NA
P98164	LRP2	1	0	NA
Q9UKG1	APPL1	1	0	NA
Q4LE39	ARID4B	1	0	NA
Q8WYP5	AHCTF1	1	0	NA
Q96JM7	L3MBTL3	1	0	NA
Q8TAM6	ERMN	1	0	NA
Q02952	AKAP12	1	0	NA
Q5VTL8	PRPF38B	1	0	NA
Q9UEW8	STK39	1	0	NA
Q14498	RBM39	1	0	NA
Q9BVG4	CXorf26	1	0	NA
P24593	IGFBP5	1	0	NA
P00568	AK1	1	0	NA
O95409	ZIC2	1	0	NA
O00602	FCN1	1	0	NA
Q15915	ZIC1	1	0	NA
Q9HCS4	TCF7L1	1	0	NA
P16109	SELP	1	0	NA
P02745	C1QA	1	0	NA
Q13642	FHL1	1	0	NA
P06396	GSN	1	0	NA
O60481	ZIC3	1	0	NA
Q06124	PTPN11	1	0	NA
O60907	TBL1X	1	0	NA
P14151	SELL	1	0	NA
P02743	APCS	1	0	NA
Q15678	PTPN14	1	0	NA
P49354	FNTA	1	0	NA
P51532	SMARCA4	1	0	NA
Q96QZ7	MAGI1	1	0	NA
P49715	CEBPA	1	0	NA
Q12864	CDH17	1	0	NA
P22223	CDH3	1	0	NA
P14923	JUP	1	0	NA
P19793	RXRA	1	0	NA
Q13643	FHL3	1	0	NA
O60716	CTNND1	1	0	NA
P10915	HAPLN1	1	0	NA
P05549	TFAP2A	1	0	NA
Q9P2A4	ABI3	1	0	NA
Q16790	CA9	1	0	NA
P00747	PLG	1	0	NA
Q15078	CDK5R1	1	0	NA
Q15262	PTPRK	1	0	NA
Q05516	ZBTB16	1	0	NA
Q9Y2T1	AXIN2	1	0	NA
P56537	EIF6	1	0	NA
Q6IE81	PHF17	1	0	NA
Q04724	TLE1	1	0	NA
Q16819	MEP1A	1	0	NA
P49682	CXCR3	1	0	NA
O00422	SAP18	1	0	NA
O00585	CCL21	1	0	NA
P61812	TGFB2	1	0	NA
Q8WUH2	TGFBRAP1	1	0	NA
Q9UI47	CTNNA3	1	0	NA
Q9Y6N8	CDH10	1	0	NA
P35712	SOX6	1	0	NA
O75478	TADA2A	1	0	NA
Q12923	PTPN13	1	0	NA
Q9HBM0	VEZT	1	0	NA
Q4KMG0	CDON	1	0	NA
P55286	CDH8	1	0	NA
Q13402	MYO7A	1	0	NA
P48023	FASLG	1	0	NA
P06241	FYN	1	0	NA
P14780	MMP9	1	0	NA
Q8TDM6	DLG5	1	0	NA
Q8TAD8	SNIP1	1	0	NA
P16591	FER	1	0	NA
Q9BWV1	BOC	1	0	NA
O14640	DVL1	1	0	NA
P22736	NR4A1	1	0	NA
P34925	RYK	1	0	NA
P46531	NOTCH1	1	0	NA
Q96PU4	UHRF2	1	0	NA
Q9UBS4	DNAJB11	1	0	NA
Q16531	DDB1	1	0	NA
Q9UNN5	FAF1	1	0	NA
Q8IUQ4	SIAH1	1	0	NA
Q01094	E2F1	1	0	NA
P08519	LPA	1	0	NA
P29120	PCSK1	1	0	NA
P55287	CDH11	1	0	NA
Q16674	MIA	1	0	NA
P55001	MFAP2	1	0	NA
Q14209	E2F2	1	0	NA
P23471	PTPRZ1	1	0	NA
Q13347	EIF3I	1	0	NA
Q06828	FMOD	1	0	0
P21246	PTN	1	0	NA
O00716	E2F3	1	0	NA
P02760	AMBP	1	0	NA
Q9UBE8	NLK	1	0	NA
P04004	VTN	1	0	NA
P11831	SRF	1	0	NA
P20749	BCL3	1	0	NA
O00482	NR5A2	1	0	NA
P55197	MLLT10	1	0	NA
P29317	EPHA2	1	0	NA
Q14392	LRRC32	1	0	NA
P20226	TBP	1	0	NA
Q9UBI6	GNG12	1	0	NA
Q9NYJ8	TAB2	1	0	NA
Q15466	NR0B2	1	0	NA
P21860	ERBB3	1	0	NA
P17174	GOT1	1	0	NA
P83916	CBX1	1	0	NA
Q02221	COX6A2	1	0	NA
Q13467	FZD5	1	0	NA
Q9HAU4	SMURF2	1	0	NA
Q99569	PKP4	1	0	NA
P09914	IFIT1	1	0	NA
Q14242	SELPLG	1	0	NA
P51668	UBE2D1	1	0	NA
P63165	SUMO1	1	0	NA
P05161	ISG15	1	0	NA
Q9UII4	HERC5	1	0	NA
P15923	TCF3	1	0	NA
P49792	RANBP2	1	0	NA
Q9UNS2	COPS3	1	0	NA
P49773	HINT1	1	0	NA
Q00597	FANCC	1	0	NA
Q99627	COPS8	1	0	NA
Q92905	COPS5	1	0	NA
P62244	RPS15A	1	0	NA
P14174	MIF	1	0	NA
Q15942	ZYX	1	0	NA
P84103	SRSF3	1	0	NA
Q9Y5A9	YTHDF2	1	0	NA
P55196	MLLT4	1	0	NA
P25685	DNAJB1	1	0	NA
P62899	RPL31	1	0	NA
Q969U7	PSMG2	1	0	NA
P13612	ITGA4	1	0	NA
O95319	CELF2	1	0	NA
P00558	PGK1	1	0	NA
P69905	HBA2	1	0	NA
P11717	IGF2R	1	0	NA
P46776	RPL27A	1	0	NA
Q16630	CPSF6	1	0	NA
P62241	RPS8	1	0	NA
Q99747	NAPG	1	0	NA
Q9NR30	DDX21	1	0	NA
P19623	SRM	1	0	NA
P06753	TPM3	1	0	NA
O75694	NUP155	1	0	NA
P50552	VASP	1	0	NA
O76003	GLRX3	1	0	NA
Q15785	TOMM34	1	0	NA
P55795	HNRNPH2	1	0	NA
P36542	ATP5C1	1	0	NA
P16401	HIST1H1B	1	0	NA
P35908	KRT2	1	0	NA
Q8TEX9	IPO4	1	0	NA
Q15084	PDIA6	1	0	NA
P27635	RPL10	1	0	NA
P46779	RPL28	1	0	NA
Q96CW1	AP2M1	1	0	NA
P49327	FASN	1	0	NA
Q92900	UPF1	1	0	NA
P42356	PI4KA	1	0	NA
P30050	RPL12	1	0	NA
P10768	ESD	1	0	NA
P35527	KRT9	1	0	NA
P08621	SNRNP70	1	0	NA
P39019	RPS19	1	0	NA
P14678	SNRPB	1	0	NA
P26599	PTBP1	1	0	NA
P06493	CDK1	1	0	NA
P61981	YWHAG	1	0	NA
P05976	MYL1	1	0	NA
O43172	PRPF4	1	0	NA
P04406	GAPDH	1	0	NA
Q96AE4	FUBP1	1	0	NA
O43684	BUB3	1	0	NA
Q13155	AIMP2	1	0	NA
Q14315	FLNC	1	0	NA
Q9ULV4	CORO1C	1	0	NA
Q13765	NACA	1	0	NA
Q7KZF4	SND1	1	0	NA
P35580	MYH10	1	0	NA
P37108	SRP14	1	0	NA
Q04637	EIF4G1	1	0	NA
P05388	RPLP0	1	0	NA
P12956	XRCC6	1	0	NA
P62316	SNRPD2	1	0	NA
P22102	GART	1	0	NA
P39748	FEN1	1	0	NA
P62913	RPL11	1	0	NA
P52597	HNRNPF	1	0	NA
Q9Y6M1	IGF2BP2	1	0	NA
P11413	G6PD	1	0	NA
Q8N163	KIAA1967	1	0	NA
P56192	MARS	1	0	NA
Q14566	MCM6	1	0	NA
O43809	NUDT21	1	0	NA
P63010	AP2B1	1	0	NA
O60506	SYNCRIP	1	0	NA
P82930	MRPS34	1	0	NA
P54577	YARS	1	0	NA
P55769	NHP2L1	1	0	NA
P07741	APRT	1	0	NA
P31948	STIP1	1	0	NA
P60709	ACTB	1	0	NA
O43390	HNRNPR	1	0	NA
O43447	PPIH	1	0	NA
Q07955	SRSF1	1	0	NA
P13645	KRT10	1	0	NA
Q12874	SF3A3	1	0	NA
Q15181	PPA1	1	0	NA
Q9BUF5	TUBB6	1	0	NA
Q15019	2019-09-02	1	0	NA
O14579	COPE	1	0	NA
O43143	DHX15	1	0	NA
O00303	EIF3F	1	0	NA
P83731	RPL24	1	0	NA
P09211	GSTP1	1	0	NA
Q09028	RBBP4	1	0	NA
P78417	GSTO1	1	0	NA
P14618	PKM	1	0	NA
Q96LR9	APOLD1	1	0	NA
P35268	RPL22	1	0	NA
P98179	RBM3	1	0	NA
Q53GS9	USP39	1	0	NA
P07737	PFN1	1	0	NA
Q86UX7	FERMT3	1	0	NA
P42677	RPS27	1	0	NA
Q9NSD9	FARSB	1	0	NA
P61088	UBE2N	1	0	NA
Q07021	C1QBP	1	0	NA
P53794	SLC5A3	1	0	NA
P11021	HSPA5	1	0	NA
Q8N684	CPSF7	1	0	NA
P41091	EIF2S3	1	0	NA
Q13151	HNRNPA0	1	0	NA
Q9NZA1	CLIC5	1	0	NA
P51991	HNRNPA3	1	0	NA
Q9Y3U8	RPL36	1	0	NA
P15927	RPA2	1	0	NA
P35544	FAU	1	0	NA
P12004	PCNA	1	0	NA
Q9NVI7	ATAD3A	1	0	NA
P21281	ATP6V1B2	1	0	NA
Q12846	STX4	1	0	NA
P13010	XRCC5	1	0	NA
Q9Y3D9	MRPS23	1	0	NA
P06899	HIST1H2BJ	1	0	NA
O94973	AP2A2	1	0	NA
P49411	TUFM	1	0	NA
P24864	CCNE1	1	0	NA
Q00059	TFAM	1	0	NA
P63220	RPS21	1	0	NA
P49736	MCM2	1	0	NA
P20248	CCNA2	1	0	NA
P29692	EEF1D	1	0	NA
Q13907	IDI1	1	0	NA
P04183	TK1	1	0	NA
Q9NZI8	IGF2BP1	1	0	NA
Q16698	DECR1	1	0	NA
O00267	SUPT5H	1	0	NA
P22087	FBL	1	0	NA
P62330	ARF6	1	0	NA
Q9BR76	CORO1B	1	0	NA
Q13148	TARDBP	1	0	NA
Q14376	GALE	1	0	NA
Q6P2Q9	PRPF8	1	0	NA
P05771	PRKCB	1	0	NA
P21964	COMT	1	0	NA
Q9NTZ6	RBM12	1	0	NA
P22234	PAICS	1	0	NA
Q9Y2X3	NOP58	1	0	NA
P61604	HSPE1	1	0	NA
P17987	TCP1	1	0	NA
O43175	PHGDH	1	0	NA
P04264	KRT1	1	0	NA
O94905	ERLIN2	1	0	NA
Q01844	EWSR1	1	0	NA
O00410	IPO5	1	0	NA
P60842	EIF4A1	1	0	NA
P45880	VDAC2	1	0	NA
Q9Y262	EIF3L	1	0	NA
P30837	ALDH1B1	1	0	NA
P62424	RPL7A	1	0	NA
Q92945	KHSRP	1	0	NA
P26196	DDX6	1	0	NA
P51148	RAB5C	1	0	NA
Q96QV6	HIST1H2AA	1	0	NA
P13489	RNH1	1	0	NA
Q9NVZ3	NECAP2	1	0	NA
Q15056	EIF4H	1	0	NA
P12829	MYL4	1	0	NA
P31942	HNRNPH3	1	0	NA
Q9Y2Q3	GSTK1	1	0	NA
Q14157	UBAP2L	1	0	NA
Q15437	SEC23B	1	0	NA
P21333	FLNA	1	0	NA
Q13185	CBX3	1	0	NA
Q01085	TIAL1	1	0	NA
Q99714	HSD17B10	1	0	NA
Q9Y6I3	EPN1	1	0	NA
P62851	RPS25	1	0	NA
P47914	RPL29	1	0	NA
P26373	RPL13	1	0	NA
P62280	RPS11	1	0	NA
Q15637	SF1	1	0	NA
P18754	RCC1	1	0	NA
P68371	TUBB4B	1	0	NA
P30626	SRI	1	0	NA
Q13263	TRIM28	1	0	NA
P09497	CLTB	1	0	NA
O43264	ZW10	1	0	NA
P62829	RPL23	1	0	NA
P62805	HIST1H4F	1	0	NA
Q9Y678	COPG1	1	0	NA
Q9NU22	MDN1	1	0	NA
Q9BV40	VAMP8	1	0	NA
P04792	HSPB1	1	0	NA
P05787	KRT8	1	0	NA
Q9UBQ5	EIF3K	1	0	NA
P46379	BAG6	1	0	NA
P59998	ARPC4	1	0	NA
A5YKK6	CNOT1	1	0	NA
Q12931	TRAP1	1	0	NA
P08727	KRT19	1	0	NA
Q8NE71	ABCF1	1	0	NA
Q13310	PABPC4	1	0	NA
P06748	NPM1	1	0	NA
Q02878	RPL6	1	0	NA
Q9NVP1	DDX18	1	0	NA
P37802	TAGLN2	1	0	NA
Q13085	ACACA	1	0	NA
Q9UNQ2	DIMT1	1	0	NA
Q9NRS6	SNX15	1	0	NA
Q9Y6E2	BZW2	1	0	NA
Q08752	PPID	1	0	NA
O75955	FLOT1	1	0	NA
P09622	DLD	1	0	NA
O00571	DDX3X	1	0	NA
P16402	HIST1H1D	1	0	NA
O43488	AKR7A2	1	0	NA
P11908	PRPS2	1	0	NA
Q99832	CCT7	1	0	NA
Q99439	CNN2	1	0	NA
Q9Y295	DRG1	1	0	NA
Q9ULH0	KIDINS220	1	0	NA
Q04837	SSBP1	1	0	NA
P62888	RPL30	1	0	NA
P46781	RPS9	1	0	NA
Q8WU79	SMAP2	1	0	NA
P50990	CCT8	1	0	NA
O43678	NDUFA2	1	0	NA
Q96PK6	RBM14	1	0	NA
Q16643	DBN1	1	0	NA
P62857	RPS28	1	0	NA
Q14011	CIRBP	1	0	NA
P04843	RPN1	1	0	NA
Q15404	RSU1	1	0	NA
P54105	CLNS1A	1	0	NA
P35579	MYH9	1	0	NA
O75367	H2AFY	1	0	NA
Q14204	DYNC1H1	1	0	NA
P53999	SUB1	1	0	NA
P68363	TUBA1B	1	0	NA
Q8N5M4	TTC9C	1	0	NA
Q14008	CKAP5	1	0	NA
Q14761	PTPRCAP	1	0	NA
Q96PU8	QKI	1	0	NA
O95456	PSMG1	1	0	NA
Q15691	MAPRE1	1	0	NA
Q92888	ARHGEF1	1	0	NA
Q14160	SCRIB	1	0	NA
P98082	DAB2	1	0	NA
Q71U36	TUBA1A	1	0	NA
P49915	GMPS	1	0	NA
P62269	RPS18	1	0	NA
P14866	HNRNPL	1	0	NA
Q09161	NCBP1	1	0	NA
O60814	HIST1H2BK	1	0	NA
P20671	HIST1H2AD	1	0	NA
O75436	VPS26A	1	0	NA
P53007	SLC25A1	1	0	NA
P49588	AARS	1	0	NA
Q15029	EFTUD2	1	0	NA
Q15185	PTGES3	1	0	NA
P31946	YWHAB	1	0	NA
P50570	DNM2	1	0	NA
Q15366	PCBP2	1	0	NA
P55060	CSE1L	1	0	NA
Q14254	FLOT2	1	0	NA
P04083	ANXA1	1	0	NA
P07814	EPRS	1	0	NA
Q9UKM9	RALY	1	0	NA
P62847	RPS24	1	0	NA
P25398	RPS12	1	0	NA
Q92616	GCN1L1	1	0	NA
Q9UK41	VPS28	1	0	NA
P25787	PSMA2	1	0	NA
P27694	RPA1	1	0	NA
Q9NY12	GAR1	1	0	NA
Q9BSJ8	ESYT1	1	0	NA
O00186	STXBP3	1	0	NA
P68400	CSNK2A1	1	0	NA
Q16718	NDUFA5	1	0	NA
Q00839	HNRNPU	1	0	NA
Q9H0S4	DDX47	1	0	NA
P09382	LGALS1	1	0	NA
P26639	TARS	1	0	NA
P54920	NAPA	1	0	NA
P38919	EIF4A3	1	0	NA
P61081	UBE2M	1	0	NA
O15371	EIF3D	1	0	NA
Q8IZL8	PELP1	1	0	NA
Q96HS1	PGAM5	1	0	NA
P61313	RPL15	1	0	NA
Q8WXE9	STON2	1	0	NA
Q96EP5	DAZAP1	1	0	NA
P67809	YBX1	1	0	NA
P53396	ACLY	1	0	NA
P62318	SNRPD3	1	0	NA
P26640	VARS	1	0	NA
P62491	RAB11A	1	0	NA
Q9NR31	SAR1A	1	0	NA
P63000	RAC1	1	0	NA
P78527	PRKDC	1	0	NA
Q9P0L0	VAPA	1	0	NA
Q12905	ILF2	1	0	NA
P62753	RPS6	1	0	NA
P30048	PRDX3	1	0	NA
O14737	PDCD5	1	0	NA
Q13283	G3BP1	1	0	NA
P39656	DDOST	1	0	NA
P18124	RPL7	1	0	NA
Q9Y3I0	C22orf28	1	0	NA
O14980	XPO1	1	0	NA
P09012	SNRPA	1	0	NA
P62750	RPL23A	1	0	NA
P04632	CAPNS1	1	0	NA
P14868	DARS	1	0	NA
P30153	PPP2R1A	1	0	NA
Q15046	KARS	1	0	NA
Q9UMS4	PRPF19	1	0	NA
P33992	MCM5	1	0	NA
P25705	ATP5A1	1	0	NA
P46777	RPL5	1	0	NA
Q9UNM6	PSMD13	1	0	NA
Q04917	YWHAH	1	0	NA
P35249	RFC4	1	0	NA
Q96AK3	APOBEC3D	1	0	NA
P08708	RPS17	1	0	NA
Q9BZE4	GTPBP4	1	0	NA
Q92841	DDX17	1	0	NA
P08195	SLC3A2	1	0	NA
Q96FS4	SIPA1	1	0	NA
P26641	EEF1G	1	0	NA
P48643	CCT5	1	0	NA
Q01813	PFKP	1	0	NA
P62917	RPL8	1	0	NA
P62701	RPS4X	1	0	NA
O60841	EIF5B	1	0	NA
P24534	EEF1B2	1	0	NA
Q16658	FSCN1	1	0	NA
P46783	RPS10	1	0	NA
Q9NPJ3	ACOT13	1	0	NA
Q9NX24	NHP2	1	0	NA
O00425	IGF2BP3	1	0	NA
P50914	RPL14	1	0	NA
P20700	LMNB1	1	0	NA
P61224	RAP1B	1	0	NA
O75533	SF3B1	1	0	NA
O00231	PSMD11	1	0	NA
O95782	AP2A1	1	0	NA
P28066	PSMA5	1	0	NA
P27816	MAP4	1	0	NA
P82979	SARNP	1	0	NA
Q9NSY1	BMP2K	1	0	NA
P61158	ACTR3	1	0	NA
P50991	CCT4	1	0	NA
O75146	HIP1R	1	0	NA
Q9HAV4	XPO5	1	0	NA
P52907	CAPZA1	1	0	NA
P55010	EIF5	1	0	NA
Q01082	SPTBN1	1	0	NA
Q15323	KRT31	1	0	NA
P43243	MATR3	1	0	NA
Q04828	AKR1C1	1	0	NA
Q9NRW3	APOBEC3C	1	0	NA
P23528	CFL1	1	0	NA
P19387	POLR2C	1	0	NA
Q96I24	FUBP3	1	0	NA
Q14533	KRT81	1	0	NA
P62979	RPS27A	1	0	NA
P20618	PSMB1	1	0	NA
Q63ZY3	KANK2	1	0	NA
P78406	RAE1	1	0	NA
P08670	VIM	1	0	NA
Q00013	MPP1	1	0	NA
P05141	SLC25A5	1	0	NA
P40939	HADHA	1	0	NA
P60866	RPS20	1	0	NA
P15880	RPS2	1	0	NA
Q9UKD2	MRTO4	1	0	NA
O75369	FLNB	1	0	NA
P36404	ARL2	1	0	NA
Q9BUL8	PDCD10	1	0	NA
Q99729	HNRNPAB	1	0	NA
P61254	RPL26	1	0	NA
Q13418	ILK	1	0	NA
P62277	RPS13	1	0	NA
Q14847	LASP1	1	0	NA
Q9Y3C6	PPIL1	1	0	NA
O75643	SNRNP200	1	0	NA
P40926	MDH2	1	0	NA
P50395	GDI2	1	0	NA
Q14166	TTLL12	1	0	NA
Q15365	PCBP1	1	0	NA
P15559	NQO1	1	0	NA
P62304	SNRPE	1	0	NA
Q12906	ILF3	1	0	NA
Q7L2E3	DHX30	1	0	NA
Q9P2J5	LARS	1	0	NA
Q9UHD8	2019-09-09	1	0	NA
P53992	SEC24C	1	0	NA
Q13242	SRSF9	1	0	NA
P62333	PSMC6	1	0	NA
P07900	HSP90AA1	1	0	NA
P46782	RPS5	1	0	NA
P47897	QARS	1	0	NA
P08779	KRT16	1	0	NA
P62263	RPS14	1	0	NA
Q96QK1	VPS35	1	0	NA
P61225	RAP2B	1	0	NA
P68402	PAFAH1B2	1	0	NA
P60660	MYL6	1	0	NA
P30041	PRDX6	1	0	NA
Q92688	ANP32B	1	0	NA
Q71UI9	H2AFV	1	0	NA
O95865	DDAH2	1	0	NA
P41252	IARS	1	0	NA
A0FGR8	ESYT2	1	0	NA
P0CG47	UBB	1	0	NA
P27105	STOM	1	0	NA
P12268	IMPDH2	1	0	NA
O14776	TCERG1	1	0	NA
Q3MHD2	LSM12	1	0	NA
P60468	SEC61B	1	0	NA
P53618	COPB1	1	0	NA
P16949	STMN1	1	0	NA
P12270	TPR	1	0	NA
Q07020	RPL18	1	0	NA
P62306	SNRPF	1	0	NA
Q71DI3	HIST2H3A	1	0	NA
P67775	PPP2CA	1	0	NA
P31040	SDHA	1	0	NA
Q01105	SET	1	0	NA
O15145	ARPC3	1	0	NA
P04075	ALDOA	1	0	NA
P35232	PHB	1	0	NA
P07910	HNRNPC	1	0	NA
P53990	IST1	1	0	NA
P17096	HMGA1	1	0	NA
Q96HC4	PDLIM5	1	0	NA
P11177	PDHB	1	0	NA
P09429	HMGB1	1	0	NA
P42766	RPL35	1	0	NA
Q5VW32	BROX	1	0	NA
P49720	PSMB3	1	0	NA
Q9BXJ9	NAA15	1	0	NA
P60228	EIF3E	1	0	NA
P62826	RAN	1	0	NA
P13796	LCP1	1	0	NA
P61160	ACTR2	1	0	NA
P62937	PPIA	1	0	NA
O15160	POLR1C	1	0	NA
P62081	RPS7	1	0	NA
P08754	GNAI3	1	0	NA
O15247	CLIC2	1	0	NA
O43776	NARS	1	0	NA
Q8TEM1	NUP210	1	0	NA
O75489	NDUFS3	1	0	NA
P26038	MSN	1	0	NA
P61247	RPS3A	1	0	NA
P19338	NCL	1	0	NA
Q8NDX9	LY6G5B	1	0	NA
O00299	CLIC1	1	0	NA
Q9H0A0	NAT10	1	0	NA
P42704	LRPPRC	1	0	NA
P78344	EIF4G2	1	0	NA
A6NHR9	SMCHD1	1	0	NA
O60610	DIAPH1	1	0	NA
Q9UQ80	PA2G4	1	0	NA
P00367	GLUD1	1	0	NA
P68104	EEF1A1	1	0	NA
O00161	SNAP23	1	0	NA
Q96AG4	LRRC59	1	0	NA
P78371	CCT2	1	0	NA
P63244	GNB2L1	1	0	NA
P13647	KRT5	1	0	NA
Q99829	CPNE1	1	0	NA
P02008	HBZ	1	0	NA
P38646	HSPA9	1	0	NA
P05783	KRT18	1	0	NA
P62854	RPS26	1	0	NA
Q9Y2Q9	MRPS28	1	0	NA
P55072	VCP	1	0	NA
P13639	EEF2	1	0	NA
O76021	RSL1D1	1	0	NA
P62266	RPS23	1	0	NA
P62906	RPL10A	1	0	NA
O14818	PSMA7	1	0	NA
P36578	RPL4	1	0	NA
P40227	CCT6A	1	0	NA
O75935	DCTN3	1	0	NA
P60900	PSMA6	1	0	NA
P37268	FDFT1	1	0	NA
P62136	PPP1CA	1	0	NA
P00403	MT-CO2	1	0	NA
Q13838	DDX39B	1	0	NA
P25205	MCM3	1	0	NA
Q92621	NUP205	1	0	NA
Q06830	PRDX1	1	0	NA
P39023	RPL3	1	0	NA
O95816	BAG2	1	0	NA
P22061	PCMT1	1	0	NA
P23396	RPS3	1	0	NA
Q9UPN3	MACF1	1	0	NA
P49368	CCT3	1	0	NA
P19404	NDUFV2	1	0	NA
P06576	ATP5B	1	0	NA
Q16401	PSMD5	1	0	NA
Q9NTK5	OLA1	1	0	NA
P00338	LDHA	1	0	NA
P05455	SSB	1	0	NA
P28074	PSMB5	1	0	NA
P40429	RPL13A	1	0	NA
P50502	ST13	1	0	NA
Q16795	NDUFA9	1	0	NA
P17858	PFKL	1	0	NA
O75340	PDCD6	1	0	NA
Q86V81	ALYREF	1	0	NA
Q9Y224	C14orf166	1	0	NA
Q13492	PICALM	1	0	NA
O14979	HNRPDL	1	0	NA
P43487	RANBP1	1	0	NA
P29401	TKT	1	0	NA
Q5VYK3	KIAA0368	1	0	NA
Q9P258	RCC2	1	0	NA
Q14152	EIF3A	1	0	NA
O14744	PRMT5	1	0	NA
P55884	EIF3B	1	0	NA
Q01518	CAP1	1	0	NA
P05198	EIF2S1	1	0	NA
Q09666	AHNAK	1	0	NA
Q9Y4E8	USP15	1	0	NA
Q99661	KIF2C	1	0	NA
O75608	LYPLA1	1	0	NA
P32119	PRDX2	1	0	NA
P47756	CAPZB	1	0	NA
Q00610	CLTC	1	0	NA
P62249	RPS16	1	0	NA
P51149	RAB7A	1	0	NA
P31943	HNRNPH1	1	0	NA
P50851	LRBA	1	0	NA
P68036	UBE2L3	1	0	NA
P07437	TUBB	1	0	NA
P07355	ANXA2	1	0	NA
P67870	CSNK2B	1	0	NA
P02786	TFRC	1	0	NA
P11940	PABPC1	1	0	NA
Q99873	PRMT1	1	0	NA
P61026	RAB10	1	0	NA
P32969	RPL9	1	0	NA
P62841	RPS15	1	0	NA
Q15149	PLEC	1	0	NA
P11171	EPB41	1	0	NA
Q9BYD1	MRPL13	1	0	NA
Q9BSD7	NTPCR	1	0	NA
Q01081	U2AF1	1	0	NA
P26583	HMGB2	1	0	NA
P49721	PSMB2	1	0	NA
Q13442	PDAP1	1	0	NA
Q15286	RAB35	1	0	NA
O75339	CILP	1	0	NA
P17020	ZNF16	1	0	NA
Q9GZV5	WWTR1	1	0	NA
Q99593	TBX5	1	0	NA
Q07817	BCL2L1	1	0	NA
Q9GZV5	WWTR1	1	0	NA
Q99593	TBX5	1	0	NA
Q07817	BCL2L1	1	0	NA

## Sheet: REAC
	Pathway identifier	Pathway name	Type	Entities FDR	#Entities found	#Interactors found	Entities ratio	#Reactions found	Reactions ratio	#Entities total	#Interactors found	#Interactors total	Entities ratio	Entities pValue	Entities FDR	#Reactions found	#Reactions total	Reactions ratio	Species identifier	Species name	Submitted entities found	Mapped entities	Submitted entities hit interactor	Interacts with	Found reaction identifiers
1	R-HSA-8948216	Collagen chain trimerization	Extracellular matrix organization (Homo sapiens)	1.39888e-14	9	0	0.00394796	8	0.00237369	44	0	0	0.00394796	1.11022e-16	1.39888e-14	8	28	0.00237369	9606	Homo sapiens	P12110;P02461;P12109;P20849;P08123;P20908;Q99715;P12111;Q05707	P12110;P02461;P12109;P20849;P08123;P20908;Q99715;P12111;Q05707			R-HSA-8944232;R-HSA-8944236;R-HSA-8944223;R-HSA-8944240;R-HSA-8944227;R-HSA-8944229;R-HSA-8944214;R-HSA-8944247
2	R-HSA-1442490	Collagen degradation	Extracellular matrix organization (Homo sapiens)	1.39888e-14	9	1	0.00574249	15	0.00288233	64	1	9	0.00574249	1.11022e-16	1.39888e-14	15	34	0.00288233	9606	Homo sapiens	P12110;P02461;P12109;P20849;P08123;P20908;Q99715;P12111;Q05707	P12110;P02461;P12109;P20849;P08123;P20908;Q99715;P12111;Q05707	P13611	P14780	R-HSA-1564117;R-HSA-1564112;R-HSA-2168046;R-HSA-1564184;R-HSA-1454822;R-HSA-2485111;R-HSA-1474213;R-HSA-1454757;R-HSA-1564164;R-HSA-1474210;R-HSA-2473584;R-HSA-1458433;R-HSA-2168982;R-HSA-2473596;R-HSA-2537499
3	R-HSA-3000178	ECM proteoglycans	Extracellular matrix organization (Homo sapiens)	1.39888e-14	15	2	0.0068192	12	0.00194981	76	2	37	0.0068192	1.11022e-16	1.39888e-14	12	23	0.00194981	9606	Homo sapiens	P02461;P12109;P20908;P13611;P51884;P12111;Q06828;P12110;P21810;P20849;P08123;P24821;Q9BXN1;P01137;P02751	P02461;P12109;P20908;P13611;P51884;P12111;Q06828;P12110;P21810;P20849;P08123;P24821;Q9BXN1;P01137;P02751	P02461;P02751	P09486;P07585	R-HSA-4086204;R-HSA-2424246;R-HSA-2396370;R-HSA-2327909;R-HSA-2424243;R-HSA-2424252;R-HSA-2681681;R-HSA-2466238;R-HSA-2681667;R-HSA-2327886;R-HSA-2465883;R-HSA-2466106
4	R-HSA-1474244	Extracellular matrix organization	Extracellular matrix organization (Homo sapiens)	1.39888e-14	17	7	0.0270076	122	0.0269583	301	7	461	0.0270076	1.11022e-16	1.39888e-14	122	318	0.0269583	9606	Homo sapiens	P02461;P12109;P20908;P13611;P51884;P12111;Q06828;P12110;P21810;P20849;P08123;P24821;Q9BXN1;P01137;Q99715;Q05707;P02751	P02461;P12109;P20908;P13611;P51884;P12111;Q06828;P12110;P21810;P20849;P08123;P24821;Q9BXN1;P01137;Q99715;Q05707;P02751	P02461;P01137;P02751;P51884;P35222;P13611;P20908	P01033;P07237;P07996;P02751;P01137;P50281;P24821;P08253;P09486;P07585;P12830;P16284;P14780	R-HSA-2002460;R-HSA-3828025;R-HSA-216064;R-HSA-1592349;R-HSA-216068;R-HSA-1604368;R-HSA-2545196;R-HSA-1564184;R-HSA-1604360;R-HSA-1566981;R-HSA-1564164;R-HSA-2002440;R-HSA-1458433;R-HSA-2533950;R-HSA-2533944;R-HSA-2466106;R-HSA-1604359;R-HSA-2250301;R-HSA-3788061;R-HSA-2002466;R-HSA-2537499;R-HSA-2327909;R-HSA-2465890;R-HSA-1604690;R-HSA-2534248;R-HSA-2485111;R-HSA-2473584;R-HSA-1980233;R-HSA-247…
5	R-HSA-1474228	Degradation of the extracellular matrix	Extracellular matrix organization (Homo sapiens)	1.00919e-13	10	4	0.0125617	33	0.00890132	140	4	62	0.0125617	9.99201e-16	1.00919e-13	33	105	0.00890132	9606	Homo sapiens	P12110;P02461;P12109;P20849;P08123;P20908;Q99715;P12111;Q05707;P02751	P12110;P02461;P12109;P20849;P08123;P20908;Q99715;P12111;Q05707;P02751	P51884;P02751;P13611;P20908	P01033;P50281;P08253;P14780;P07585	R-HSA-8940554;R-HSA-1564117;R-HSA-3828025;R-HSA-1592349;R-HSA-1564112;R-HSA-1604368;R-HSA-1604690;R-HSA-1602454;R-HSA-1592278;R-HSA-2534248;R-HSA-2168046;R-HSA-1564184;R-HSA-1604360;R-HSA-2485111;R-HSA-1566981;R-HSA-1564164;R-HSA-2473584;R-HSA-1458433;R-HSA-2533950;R-HSA-2473596;R-HSA-2533944;R-HSA-1604359;R-HSA-3788061;R-HSA-1604350;R-HSA-1604722;R-HSA-1592436;R-HSA-3785684;R-HSA-1454822;R-HSA-1…
6	R-HSA-1650814	Collagen biosynthesis and modifying enzymes	Extracellular matrix organization (Homo sapiens)	2.14495e-13	9	1	0.00601166	30	0.0043235	67	1	32	0.00601166	2.55351e-15	2.14495e-13	30	51	0.0043235	9606	Homo sapiens	P12110;P02461;P12109;P20849;P08123;P20908;Q99715;P12111;Q05707	P12110;P02461;P12109;P20849;P08123;P20908;Q99715;P12111;Q05707	P01137	P07237	R-HSA-8948232;R-HSA-2002460;R-HSA-8948234;R-HSA-8948224;R-HSA-8948226;R-HSA-8948228;R-HSA-8948230;R-HSA-8948231;R-HSA-2002440;R-HSA-1981128;R-HSA-1980233;R-HSA-8944223;R-HSA-1981120;R-HSA-8944214;R-HSA-8944232;R-HSA-1650808;R-HSA-2002428;R-HSA-1614460;R-HSA-8944236;R-HSA-1614461;R-HSA-2022073;R-HSA-8944227;R-HSA-2089971;R-HSA-8944229;R-HSA-1981104;R-HSA-8948219;R-HSA-8948222;R-HSA-8944240;R-HSA-1…
7	R-HSA-2022090	Assembly of collagen fibrils and other multimeric structures	Extracellular matrix organization (Homo sapiens)	5.35572e-13	9	0	0.00547331	17	0.00220414	61	0	9	0.00547331	7.43849e-15	5.35572e-13	17	26	0.00220414	9606	Homo sapiens	P12110;P02461;P12109;P20849;P08123;P20908;Q99715;P12111;Q05707	P12110;P02461;P12109;P20849;P08123;P20908;Q99715;P12111;Q05707			R-HSA-2395302;R-HSA-2395340;R-HSA-1474266;R-HSA-2396234;R-HSA-2213201;R-HSA-2395223;R-HSA-2213205;R-HSA-2243926;R-HSA-2213207;R-HSA-2395314;R-HSA-2395324;R-HSA-2243931;R-HSA-2213210;R-HSA-2002466;R-HSA-2395257;R-HSA-2395322;R-HSA-2250301
8	R-HSA-1474290	Collagen formation	Extracellular matrix organization (Homo sapiens)	2.25919e-12	9	1	0.00807537	47	0.00652764	90	1	41	0.00807537	3.58602e-14	2.25919e-12	47	77	0.00652764	9606	Homo sapiens	P12110;P02461;P12109;P20849;P08123;P20908;Q99715;P12111;Q05707	P12110;P02461;P12109;P20849;P08123;P20908;Q99715;P12111;Q05707	P01137	P07237	R-HSA-8948232;R-HSA-2002460;R-HSA-8948234;R-HSA-2395302;R-HSA-8948224;R-HSA-8948226;R-HSA-1474266;R-HSA-8948228;R-HSA-8948230;R-HSA-8948231;R-HSA-2002440;R-HSA-1981128;R-HSA-2395314;R-HSA-1980233;R-HSA-8944223;R-HSA-2395324;R-HSA-2395257;R-HSA-1981120;R-HSA-2395322;R-HSA-8944214;R-HSA-2250301;R-HSA-8944232;R-HSA-1650808;R-HSA-2002428;R-HSA-1614460;R-HSA-8944236;R-HSA-1614461;R-HSA-2022073;R-HSA-2…
9	R-HSA-216083	Integrin cell surface interactions	Extracellular matrix organization (Homo sapiens)	6.84706e-11	10	4	0.00762674	14	0.00457782	85	4	287	0.00762674	1.22269e-12	6.84706e-11	14	54	0.00457782	9606	Homo sapiens	P12110;P02461;P12109;P20849;P08123;P24821;P20908;P51884;P12111;P02751	P12110;P02461;P12109;P20849;P08123;P24821;P20908;P51884;P12111;P02751	P01137;P02751;P35222;P20908	P07996;P02751;P24821;P12830;P16284	R-HSA-114563;R-HSA-210304;R-HSA-216064;R-HSA-349603;R-HSA-216068;R-HSA-265422;R-HSA-2327695;R-HSA-216045;R-HSA-4086223;R-HSA-216050;R-HSA-4085133;R-HSA-265426;R-HSA-4084903;R-HSA-349593
10	R-HSA-3560782	Diseases associated with glycosaminoglycan metabolism	Disease (Homo sapiens)	8.9733e-09	6	0	0.00367878	12	0.00245846	41	0	0	0.00367878	1.79466e-10	8.9733e-09	12	29	0.00245846	9606	Homo sapiens	Q06828;P21810;P51888;P13611;P20774;P51884	Q06828;P21810;P51888;P13611;P20774;P51884			R-HSA-3636919;R-HSA-3595175;R-HSA-3656230;R-HSA-3560804;R-HSA-3560802;R-HSA-9035949;R-HSA-3656258;R-HSA-9035950;R-HSA-3656269;R-HSA-3595178;R-HSA-4420365;R-HSA-3595176
11	R-HSA-419037	NCAM1 interactions	Developmental Biology (Homo sapiens)	6.46869e-08	6	0	0.00376851	1	0.000847745	42	0	17	0.00376851	1.40624e-09	6.46869e-08	1	10	0.000847745	9606	Homo sapiens	P12110;P02461;P12109;P20849;P20908;P12111	P12110;P02461;P12109;P20849;P20908;P12111			R-HSA-375151
12	R-HSA-3656244	Defective B4GALT1 causes B4GALT1-CDG (CDG-2d)	Disease (Homo sapiens)	6.5407e-08	4	0	0.000717811	3	0.000254323	8	0	0	0.000717811	1.81686e-09	6.5407e-08	3	3	0.000254323	9606	Homo sapiens	Q06828;P51888;P20774;P51884	Q06828;P51888;P20774;P51884			R-HSA-3656230;R-HSA-9035949;R-HSA-9035950
13	R-HSA-3656225	Defective CHST6 causes MCDC1	Disease (Homo sapiens)	6.5407e-08	4	0	0.000717811	1	8.47745e-05	8	0	0	0.000717811	1.81686e-09	6.5407e-08	1	1	8.47745e-05	9606	Homo sapiens	Q06828;P51888;P20774;P51884	Q06828;P51888;P20774;P51884			R-HSA-3656269
14	R-HSA-3656243	Defective ST3GAL3 causes MCT12 and EIEE15	Disease (Homo sapiens)	6.5407e-08	4	0	0.000717811	1	8.47745e-05	8	0	0	0.000717811	1.81686e-09	6.5407e-08	1	1	8.47745e-05	9606	Homo sapiens	Q06828;P51888;P20774;P51884	Q06828;P51888;P20774;P51884			R-HSA-3656258
15	R-HSA-2022857	Keratan sulfate degradation	Metabolism (Homo sapiens)	4.15297e-07	4	0	0.00116644	2	0.000593421	13	0	0	0.00116644	1.25848e-08	4.15297e-07	2	7	0.000593421	9606	Homo sapiens	Q06828;P51888;P20774;P51884	Q06828;P51888;P20774;P51884			R-HSA-2046239;R-HSA-1793217
16	R-HSA-375165	NCAM signaling for neurite out-growth	Developmental Biology (Homo sapiens)	1.22524e-06	6	1	0.00565276	2	0.00194981	63	1	120	0.00565276	3.95238e-08	1.22524e-06	2	23	0.00194981	9606	Homo sapiens	P12110;P02461;P12109;P20849;P20908;P12111	P12110;P02461;P12109;P20849;P20908;P12111	P02751	P06241	R-HSA-375151;R-HSA-391867
17	R-HSA-3000170	Syndecan interactions	Extracellular matrix organization (Homo sapiens)	3.2446e-06	6	3	0.00242261	5	0.00127162	27	3	102	0.00242261	1.11883e-07	3.2446e-06	5	15	0.00127162	9606	Homo sapiens	P02461;P08123;P24821;P20908;P01137;P02751	P02461;P08123;P24821;P20908;P01137;P02751	P01137;P02751;P20908	P07996;P01137;P24821	R-HSA-2681675;R-HSA-2681694;R-HSA-2731075;R-HSA-2731141;R-HSA-2731078
18	R-HSA-186797	Signaling by PDGF	Signal Transduction (Homo sapiens)	3.7141e-06	6	1	0.00529385	2	0.00237369	59	1	167	0.00529385	1.32646e-07	3.7141e-06	2	28	0.00237369	9606	Homo sapiens	P12110;P02461;P12109;P20849;P20908;P12111	P12110;P02461;P12109;P20849;P20908;P12111	P35222	P12931	R-HSA-186819;R-HSA-382054
19	R-HSA-1630316	Glycosaminoglycan metabolism	Metabolism (Homo sapiens)	6.48576e-06	6	0	0.0111261	31	0.00729061	124	0	16	0.0111261	2.49452e-07	6.48576e-06	31	86	0.00729061	9606	Homo sapiens	Q06828;P21810;P51888;P13611;P20774;P51884	Q06828;P21810;P51888;P13611;P20774;P51884			R-HSA-2046239;R-HSA-2046175;R-HSA-1971487;R-HSA-1793176;R-HSA-1971482;R-HSA-1971483;R-HSA-2046298;R-HSA-2065233;R-HSA-2046222;R-HSA-2046285;R-HSA-1793217;R-HSA-2022911;R-HSA-1889981;R-HSA-2025724;R-HSA-9638064;R-HSA-2018682;R-HSA-2025723;R-HSA-1889978;R-HSA-2046265;R-HSA-1878002;R-HSA-2022065;R-HSA-9632034;R-HSA-2022063;R-HSA-2022061;R-HSA-9632033;R-HSA-2022056;R-HSA-2022052;R-HSA-2046180;R-HSA-1…
20	R-HSA-2022854	Keratan sulfate biosynthesis	Metabolism (Homo sapiens)	8.72311e-06	4	0	0.00251234	8	0.00076297	28	0	2	0.00251234	3.48924e-07	8.72311e-06	8	9	0.00076297	9606	Homo sapiens	Q06828;P51888;P20774;P51884	Q06828;P51888;P20774;P51884			R-HSA-2046175;R-HSA-2046222;R-HSA-2025724;R-HSA-2046285;R-HSA-2046298;R-HSA-2025723;R-HSA-2046265;R-HSA-2046180
21	R-HSA-3781865	Diseases of glycosylation	Disease (Homo sapiens)	1.16417e-05	6	0	0.0131	12	0.00652764	146	0	12	0.0131	4.85072e-07	1.16417e-05	12	77	0.00652764	9606	Homo sapiens	Q06828;P21810;P51888;P13611;P20774;P51884	Q06828;P21810;P51888;P13611;P20774;P51884			R-HSA-3636919;R-HSA-3595175;R-HSA-3656230;R-HSA-3560804;R-HSA-3560802;R-HSA-9035949;R-HSA-3656258;R-HSA-9035950;R-HSA-3656269;R-HSA-3595178;R-HSA-4420365;R-HSA-3595176
22	R-HSA-1638074	Keratan sulfate/keratin metabolism	Metabolism (Homo sapiens)	1.65088e-05	4	0	0.0030507	10	0.00135639	34	0	2	0.0030507	7.17775e-07	1.65088e-05	10	16	0.00135639	9606	Homo sapiens	Q06828;P51888;P20774;P51884	Q06828;P51888;P20774;P51884			R-HSA-2046239;R-HSA-2046175;R-HSA-2046222;R-HSA-2025724;R-HSA-2046285;R-HSA-2046298;R-HSA-2025723;R-HSA-2046265;R-HSA-1793217;R-HSA-2046180
23	R-HSA-3000171	Non-integrin membrane-ECM interactions	Extracellular matrix organization (Homo sapiens)	1.69051e-05	6	3	0.00529385	8	0.00186504	59	3	118	0.00529385	7.68416e-07	1.69051e-05	8	22	0.00186504	9606	Homo sapiens	P02461;P08123;P24821;P20908;P01137;P02751	P02461;P08123;P24821;P20908;P01137;P02751	P01137;P02751;P20908	P07996;P01137;P24821	R-HSA-2681675;R-HSA-2396337;R-HSA-2681694;R-HSA-2465890;R-HSA-2327738;R-HSA-2731075;R-HSA-2731141;R-HSA-2731078
24	R-HSA-8874081	MET activates PTK2 signaling	Signal Transduction (Homo sapiens)	2.13482e-05	4	1	0.00269179	2	0.000423872	30	1	68	0.00269179	1.01658e-06	2.13482e-05	2	5	0.000423872	9606	Homo sapiens	P02461;P08123;P20908;P02751	P02461;P08123;P20908;P02751	P35222	P12931	R-HSA-8874083;R-HSA-8874079
25	R-HSA-8875878	MET promotes cell motility	Signal Transduction (Homo sapiens)	3.15855e-05	4	1	0.00367878	2	0.00101729	41	1	69	0.00367878	1.57928e-06	3.15855e-05	2	12	0.00101729	9606	Homo sapiens	P02461;P08123;P20908;P02751	P02461;P08123;P20908;P02751	P35222	P12931	R-HSA-8874083;R-HSA-8874079
26	R-HSA-3595174	Defective CHST14 causes EDS, musculocontractural type	Disease (Homo sapiens)	0.00199844	2	0	0.000717811	1	8.47745e-05	8	0	0	0.000717811	0.000111024	0.00199844	1	1	8.47745e-05	9606	Homo sapiens	P21810;P13611	P21810;P13611			R-HSA-3636919
27	R-HSA-3595172	Defective CHST3 causes SEDCJD	Disease (Homo sapiens)	0.00199844	2	0	0.000717811	1	8.47745e-05	8	0	0	0.000717811	0.000111024	0.00199844	1	1	8.47745e-05	9606	Homo sapiens	P21810;P13611	P21810;P13611			R-HSA-3595175
28	R-HSA-3595177	Defective CHSY1 causes TPBS	Disease (Homo sapiens)	0.00199844	2	0	0.000717811	2	0.000169549	8	0	0	0.000717811	0.000111024	0.00199844	2	2	0.000169549	9606	Homo sapiens	P21810;P13611	P21810;P13611			R-HSA-3595178;R-HSA-3595176
29	R-HSA-71387	Metabolism of carbohydrates	Metabolism (Homo sapiens)	0.00257531	6	0	0.0269179	31	0.019922	300	0	143	0.0269179	0.000151489	0.00257531	31	235	0.019922	9606	Homo sapiens	Q06828;P21810;P51888;P13611;P20774;P51884	Q06828;P21810;P51888;P13611;P20774;P51884			R-HSA-2046239;R-HSA-2046175;R-HSA-1971487;R-HSA-1793176;R-HSA-1971482;R-HSA-1971483;R-HSA-2046298;R-HSA-2065233;R-HSA-2046222;R-HSA-2046285;R-HSA-1793217;R-HSA-2022911;R-HSA-1889981;R-HSA-2025724;R-HSA-9638064;R-HSA-2018682;R-HSA-2025723;R-HSA-1889978;R-HSA-2046265;R-HSA-1878002;R-HSA-2022065;R-HSA-9632034;R-HSA-2022063;R-HSA-2022061;R-HSA-9632033;R-HSA-2022056;R-HSA-2022052;R-HSA-2046180;R-HSA-1…
30	R-HSA-2022923	Dermatan sulfate biosynthesis	Metabolism (Homo sapiens)	0.00334654	2	0	0.00098699	4	0.000339098	11	0	0	0.00098699	0.000209159	0.00334654	4	4	0.000339098	9606	Homo sapiens	P21810;P13611	P21810;P13611			R-HSA-2022063;R-HSA-2022061;R-HSA-2022052;R-HSA-2022065
31	R-HSA-9006934	Signaling by Receptor Tyrosine Kinases	Signal Transduction (Homo sapiens)	0.00367154	9	4	0.0425303	13	0.0536623	474	4	1419	0.0425303	0.000229471	0.00367154	13	633	0.0536623	9606	Homo sapiens	P12110;P02461;P12109;P20849;P08123;P20908;P35222;P12111;P02751	P12110;P02461;P12109;P20849;P08123;P20908;P35222;P12111;P02751	P02751;P35222;P02751;Q14192	P49023;P05814;Q9NYA1;P46937;P06241;P12931;Q12913	R-HSA-186819;R-HSA-1254290;R-HSA-382054;R-HSA-8874083;R-HSA-6807008;R-HSA-5218824;R-HSA-5218823;R-HSA-9603419;R-HSA-5218845;R-HSA-5357477;R-HSA-1254251;R-HSA-8874079;R-HSA-5218838
32	R-HSA-1592389	Activation of Matrix Metalloproteinases	Extracellular matrix organization (Homo sapiens)	0.00376757	0	3	0.00296097	10	0.00228891	33	3	35	0.00296097	0.000251171	0.00376757	10	27	0.00228891	9606	Homo sapiens			P51884;P13611;P20908	P01033;P50281;P08253;P14780	R-HSA-1604360;R-HSA-1592349;R-HSA-1604350;R-HSA-1604368;R-HSA-1604690;R-HSA-1604722;R-HSA-1592436;R-HSA-1602454;R-HSA-1592278;R-HSA-1604359
33	R-HSA-2024101	CS/DS degradation	Metabolism (Homo sapiens)	0.00472638	2	0	0.00125617	3	0.000847745	14	0	0	0.00125617	0.000337599	0.00472638	3	10	0.000847745	9606	Homo sapiens	P21810;P13611	P21810;P13611			R-HSA-1793176;R-HSA-2022056;R-HSA-2065233
34	R-HSA-6806834	Signaling by MET	Signal Transduction (Homo sapiens)	0.00472638	4	1	0.00708838	3	0.00415395	79	1	257	0.00708838	0.000316871	0.00472638	3	49	0.00415395	9606	Homo sapiens	P02461;P08123;P20908;P02751	P02461;P08123;P20908;P02751	P35222	P12931;Q12913	R-HSA-8874083;R-HSA-6807008;R-HSA-8874079
35	R-HSA-446343	Localization of the PINCH-ILK-PARVIN complex to focal adhesions	Cell-Cell communication (Homo sapiens)	0.00557936	0	3	0.000358905	2	0.000169549	4	3	74	0.000358905	0.000398526	0.00557936	2	2	0.000169549	9606	Homo sapiens			P02751;P35222;Q14192	P05556;P49023	R-HSA-446322;R-HSA-432897
36	R-HSA-8951671	RUNX3 regulates YAP1-mediated transcription	Gene expression (Transcription) (Homo sapiens)	0.00803561	0	2	0.000717811	2	0.000254323	8	2	11	0.000717811	0.000618124	0.00803561	2	3	0.000254323	9606	Homo sapiens			P02751;P35222	Q13761;P29279	R-HSA-8951676;R-HSA-1989766
37	R-HSA-3000480	Scavenging by Class A Receptors	Vesicle-mediated transport (Homo sapiens)	0.00803561	2	0	0.0017048	1	0.000847745	19	0	0	0.0017048	0.000618124	0.00803561	1	10	0.000847745	9606	Homo sapiens	P02461;P08123	P02461;P08123			R-HSA-3221843
38	R-HSA-4420332	Defective B3GALT6 causes EDSP2 and SEMDJL1	Disease (Homo sapiens)	0.00820908	2	0	0.00179453	1	8.47745e-05	20	0	0	0.00179453	0.00068409	0.00820908	1	1	8.47745e-05	9606	Homo sapiens	P21810;P13611	P21810;P13611			R-HSA-4420365
39	R-HSA-3560801	Defective B3GAT3 causes JDSSDHD	Disease (Homo sapiens)	0.00820908	2	0	0.00179453	1	8.47745e-05	20	0	0	0.00179453	0.00068409	0.00820908	1	1	8.47745e-05	9606	Homo sapiens	P21810;P13611	P21810;P13611			R-HSA-3560802
40	R-HSA-3560783	Defective B4GALT7 causes EDS, progeroid type	Disease (Homo sapiens)	0.00820908	2	0	0.00179453	1	8.47745e-05	20	0	0	0.00179453	0.00068409	0.00820908	1	1	8.47745e-05	9606	Homo sapiens	P21810;P13611	P21810;P13611			R-HSA-3560804
41	R-HSA-2022870	Chondroitin sulfate biosynthesis	Metabolism (Homo sapiens)	0.00903979	2	0	0.00179453	9	0.00076297	20	0	1	0.00179453	0.000753315	0.00903979	9	9	0.00076297	9606	Homo sapiens	P21810;P13611	P21810;P13611			R-HSA-9632034;R-HSA-1971487;R-HSA-2022911;R-HSA-9632033;R-HSA-1971482;R-HSA-2018682;R-HSA-1971483;R-HSA-1971491;R-HSA-2018659
42	R-HSA-8957275	Post-translational protein phosphorylation	Metabolism of proteins (Homo sapiens)	0.0133263	3	0	0.00960072	1	8.47745e-05	107	0	0	0.00960072	0.00111053	0.0133263	1	1	8.47745e-05	9606	Homo sapiens	P24821;P13611;P02751	P24821;P13611;P02751			R-HSA-8952289
43	R-HSA-1971475	A tetrasaccharide linker sequence is required for GAG synthesis	Metabolism (Homo sapiens)	0.0189919	2	0	0.00233288	5	0.000423872	26	0	6	0.00233288	0.00172654	0.0189919	5	5	0.000423872	9606	Homo sapiens	P21810;P13611	P21810;P13611			R-HSA-1889981;R-HSA-9638064;R-HSA-1889978;R-HSA-1878002;R-HSA-1889955
44	R-HSA-2129379	Molecules associated with elastic fibres	Extracellular matrix organization (Homo sapiens)	0.0293952	2	0	0.0034096	4	0.000847745	38	0	2	0.0034096	0.00267229	0.0293952	4	10	0.000847745	9606	Homo sapiens	P01137;P02751	P01137;P02751			R-HSA-2395364;R-HSA-2395328;R-HSA-2537665;R-HSA-2395320
45	R-HSA-1566977	Fibronectin matrix formation	Extracellular matrix organization (Homo sapiens)	0.0323316	1	2	0.000538358	3	0.000254323	6	2	39	0.000538358	0.00293923	0.0323316	3	3	0.000254323	9606	Homo sapiens	P02751	P02751	P02751;P20908	P02751	R-HSA-202723;R-HSA-2327746;R-HSA-2545196
46	R-HSA-3642279	TGFBR2 MSI Frameshift Mutants in Cancer	Disease (Homo sapiens)	0.0379596	1	0	0.000179453	1	8.47745e-05	2	0	0	0.000179453	0.00379596	0.0379596	1	1	8.47745e-05	9606	Homo sapiens	P01137	P01137			R-HSA-3642203
47	R-HSA-446353	Cell-extracellular matrix interactions	Cell-Cell communication (Homo sapiens)	0.0431208	0	3	0.00161507	3	0.000847745	18	3	163	0.00161507	0.00431208	0.0431208	3	10	0.000847745	9606	Homo sapiens			P02751;P35222;Q14192	P05556;P49023;Q96AC1	R-HSA-430341;R-HSA-446322;R-HSA-432897
48	R-HSA-1566948	Elastic fibre formation	Extracellular matrix organization (Homo sapiens)	0.0479028	2	0	0.00403769	4	0.00144117	45	0	14	0.00403769	0.00479028	0.0479028	4	17	0.00144117	9606	Homo sapiens	P01137;P02751	P01137;P02751			R-HSA-2395364;R-HSA-2395328;R-HSA-2537665;R-HSA-2395320
	R-HSA-1793185	Chondroitin sulfate/dermatan sulfate metabolism	Metabolism (Homo sapiens)	0.0511983	2	0	0.00448632	21	0.00237369	50	0	7	0.00448632	0.00531843	0.0511983	21	28	0.00237369	9606	Homo sapiens	P21810;P13611	P21810;P13611			R-HSA-1971487;R-HSA-2022911;R-HSA-1889981;R-HSA-1793176;R-HSA-9638064;R-HSA-1971482;R-HSA-2018682;R-HSA-1971483;R-HSA-1889978;R-HSA-2065233;R-HSA-1878002;R-HSA-2022065;R-HSA-9632034;R-HSA-2022063;R-HSA-2022061;R-HSA-9632033;R-HSA-2022056;R-HSA-2022052;R-HSA-1971491;R-HSA-2018659;R-HSA-1889955
	R-HSA-3642278	Loss of Function of TGFBR2 in Cancer	Disease (Homo sapiens)	0.0511983	1	0	0.000269179	2	0.000169549	3	0	0	0.000269179	0.0056887	0.0511983	2	2	0.000169549	9606	Homo sapiens	P01137	P01137			R-HSA-3645780;R-HSA-3642203
	R-HSA-3645790	TGFBR2 Kinase Domain Mutants in Cancer	Disease (Homo sapiens)	0.0511983	1	0	0.000269179	1	8.47745e-05	3	0	0	0.000269179	0.0056887	0.0511983	1	1	8.47745e-05	9606	Homo sapiens	P01137	P01137			R-HSA-3645780
	R-HSA-1638091	Heparan sulfate/heparin (HS-GAG) metabolism	Metabolism (Homo sapiens)	0.0545613	2	0	0.00493495	5	0.00279756	55	0	6	0.00493495	0.00606237	0.0545613	5	33	0.00279756	9606	Homo sapiens	P21810;P13611	P21810;P13611			R-HSA-1889981;R-HSA-9638064;R-HSA-1889978;R-HSA-1878002;R-HSA-1889955
	R-HSA-1643685	Disease	Disease (Homo sapiens)	0.0571276	10	5	0.105608	61	0.0799424	1177	5	2498	0.105608	0.00634751	0.0571276	61	943	0.0799424	9606	Homo sapiens	Q06828;P21810;P51888;P13611;P01137;P35222;O94907;P20774;P51884;P02751	Q06828;P21810;P51888;P13611;P01137;P35222;O94907;P20774;P51884;P02751	P01137;P35222;P35453;Q05707;P02751	P32119;P05412;P25054;Q5JTC6;Q9Y297;P06241;P12931;P63208;O15169;Q92793;P49841;P05067	R-HSA-3636919;R-HSA-6802919;R-HSA-6802918;R-HSA-2220964;R-HSA-6802914;R-HSA-6802912;R-HSA-6802926;R-HSA-3656382;R-HSA-2220971;R-HSA-6802925;R-HSA-4839746;R-HSA-6802922;R-HSA-6802921;R-HSA-5339713;R-HSA-6802935;R-HSA-3595175;R-HSA-3656230;R-HSA-6802934;R-HSA-6802933;R-HSA-8876948;R-HSA-6802932;R-HSA-6802943;R-HSA-6802942;R-HSA-4839635;R-HSA-4839634;R-HSA-3595178;R-HSA-3595176;R-HSA-4839638;R-HSA-1…
	R-HSA-8941855	RUNX3 regulates CDKN1A transcription	Gene expression (Transcription) (Homo sapiens)	0.0580605	1	1	0.000628084	3	0.000508647	7	1	57	0.000628084	0.00645116	0.0580605	3	6	0.000508647	9606	Homo sapiens	P01137	P01137	P35222	Q13761	R-HSA-8878117;R-HSA-8952128;R-HSA-8878143
	R-HSA-75892	Platelet Adhesion to exposed collagen	Hemostasis (Homo sapiens)	0.0606237	1	1	0.0013459	5	0.000508647	15	1	56	0.0013459	0.00705516	0.0606237	5	6	0.000508647	9606	Homo sapiens	P08123	P08123	P02751	P06241	R-HSA-114577;R-HSA-432295;R-HSA-114563;R-HSA-114671;R-HSA-114670
	R-HSA-3656535	TGFBR1 LBD Mutants in Cancer	Disease (Homo sapiens)	0.0606237	1	0	0.000358905	1	8.47745e-05	4	0	0	0.000358905	0.00757796	0.0606237	1	1	8.47745e-05	9606	Homo sapiens	P01137	P01137			R-HSA-3656382
	R-HSA-381426	Regulation of Insulin-like Growth Factor (IGF) transport and uptake by Insulin-like Growth Factor Binding Proteins (IGFBPs)	Metabolism of proteins (Homo sapiens)	0.0684583	3	0	0.0111261	1	0.00118684	124	0	101	0.0111261	0.00855729	0.0684583	1	14	0.00118684	9606	Homo sapiens	P24821;P13611;P02751	P24821;P13611;P02751			R-HSA-8952289
	R-HSA-8940973	RUNX2 regulates osteoblast differentiation	Gene expression (Transcription) (Homo sapiens)	0.0692989	1	2	0.00224316	8	0.00203459	25	2	200	0.00224316	0.00866236	0.0692989	8	24	0.00203459	9606	Homo sapiens	P10071	P10071	P02751;P35222	P02452;Q9GZV5;P46937;P00519	R-HSA-8937864;R-HSA-8985227;R-HSA-8937820;R-HSA-8985644;R-HSA-8937856;R-HSA-2064932;R-HSA-8937844;R-HSA-9008215
	R-HSA-4420097	VEGFA-VEGFR2 Pathway	Signal Transduction (Homo sapiens)	0.0698172	1	4	0.00870345	5	0.00652764	97	4	366	0.00870345	0.00872715	0.0698172	5	77	0.00652764	9606	Homo sapiens	P35222	P35222	P02751;P35222;P02751;Q14192	P49023;Q9NYA1;P06241	R-HSA-5218845;R-HSA-5357477;R-HSA-5218824;R-HSA-5218823;R-HSA-5218838
	R-HSA-6785807	Interleukin-4 and Interleukin-13 signaling	Immune System (Homo sapiens)	0.0794224	3	0	0.00995962	2	0.00389963	111	0	137	0.00995962	0.0103304	0.0794224	2	46	0.00389963	9606	Homo sapiens	P08123;P01137;P02751	P08123;P01137;P02751			R-HSA-6785895;R-HSA-6789615
	R-HSA-8964041	LDL remodeling	Transport of small molecules (Homo sapiens)	0.0794224	0	1	0.000358905	1	0.000169549	4	1	2	0.000358905	0.0113461	0.0794224	1	2	0.000169549	9606	Homo sapiens			P02751	P08519	R-HSA-176879
	R-HSA-194138	Signaling by VEGF	Signal Transduction (Homo sapiens)	0.0794224	1	4	0.00951099	5	0.00703628	106	4	386	0.00951099	0.010267	0.0794224	5	83	0.00703628	9606	Homo sapiens	P35222	P35222	P02751;P35222;P02751;Q14192	P49023;Q9NYA1;P06241	R-HSA-5218845;R-HSA-5357477;R-HSA-5218824;R-HSA-5218823;R-HSA-5218838
	R-HSA-3304356	SMAD2/3 Phosphorylation Motif Mutants in Cancer	Disease (Homo sapiens)	0.0794224	1	0	0.000538358	1	8.47745e-05	6	0	0	0.000538358	0.0113461	0.0794224	1	1	8.47745e-05	9606	Homo sapiens	P01137	P01137			R-HSA-3304394
	R-HSA-3656532	TGFBR1 KD Mutants in Cancer	Disease (Homo sapiens)	0.0794224	1	0	0.000538358	1	8.47745e-05	6	0	0	0.000538358	0.0113461	0.0794224	1	1	8.47745e-05	9606	Homo sapiens	P01137	P01137			R-HSA-3656523
	R-HSA-8849471	PTK6 Regulates RHO GTPases, RAS GTPase and MAP kinases	Signal Transduction (Homo sapiens)	0.0818983	0	2	0.00125617	3	0.00110207	14	2	74	0.00125617	0.0116998	0.0818983	3	13	0.00110207	9606	Homo sapiens			P02751;P35222	P49023	R-HSA-8848596;R-HSA-8848611;R-HSA-8848606
	R-HSA-446388	Regulation of cytoskeletal remodeling and cell spreading by IPP complex components	Cell-Cell communication (Homo sapiens)	0.0818983	0	2	0.000717811	1	0.000423872	8	2	81	0.000717811	0.0116998	0.0818983	1	5	0.000423872	9606	Homo sapiens			P02751;P35222	P49023	R-HSA-446322
	R-HSA-5358351	Signaling by Hedgehog	Signal Transduction (Homo sapiens)	0.0899408	1	4	0.013459	36	0.00695151	150	4	350	0.013459	0.0128487	0.0899408	36	82	0.00695151	9606	Homo sapiens	P10071	P10071	P01137;P35222;P10071;Q14192	P07237;O95995;P49757;P49841;Q6P1J9;Q9UMX1	R-HSA-5635860;R-HSA-5635856;R-HSA-5635859;R-HSA-5632668;R-HSA-5612508;R-HSA-5612510;R-HSA-5635845;R-HSA-5617413;R-HSA-5610757;R-HSA-5617412;R-HSA-5358336;R-HSA-5635846;R-HSA-5610758;R-HSA-5635841;R-HSA-5617408;R-HSA-5610752;R-HSA-5358340;R-HSA-5635843;R-HSA-5610754;R-HSA-5635842;R-HSA-5617410;R-HSA-5635853;R-HSA-5635855;R-HSA-5610767;R-HSA-5635854;R-HSA-5610766;R-HSA-5635848;R-HSA-5610760;R-HSA-5…
	R-HSA-3656534	Loss of Function of TGFBR1 in Cancer	Disease (Homo sapiens)	0.0925743	1	0	0.000628084	2	0.000169549	7	0	0	0.000628084	0.0132249	0.0925743	2	2	0.000169549	9606	Homo sapiens	P01137	P01137			R-HSA-3656382;R-HSA-3656523
	R-HSA-8866906	TFAP2 (AP-2) family regulates transcription of other transcription factors	Gene expression (Transcription) (Homo sapiens)	0.0925743	0	1	0.000358905	1	0.000169549	4	1	3	0.000358905	0.0132249	0.0925743	1	2	0.000169549	9606	Homo sapiens			P35222	Q99697	R-HSA-8864729
	R-HSA-8941326	RUNX2 regulates bone development	Gene expression (Transcription) (Homo sapiens)	0.0926057	1	2	0.00287124	8	0.00271278	32	2	236	0.00287124	0.0132294	0.0926057	8	32	0.00271278	9606	Homo sapiens	P10071	P10071	P02751;P35222	P02452;Q9GZV5;P46937;P00519	R-HSA-8937864;R-HSA-8985227;R-HSA-8937820;R-HSA-8985644;R-HSA-8937856;R-HSA-2064932;R-HSA-8937844;R-HSA-9008215
	R-HSA-422475	Axon guidance	Developmental Biology (Homo sapiens)	0.0979971	6	2	0.0499776	7	0.0250933	557	2	1346	0.0499776	0.0162193	0.0979971	7	296	0.0250933	9606	Homo sapiens	P12110;P02461;P12109;P20849;P20908;P12111	P12110;P02461;P12109;P20849;P20908;P12111	P35222;P02751	P06241;P12931;P49841;P08575	R-HSA-9011241;R-HSA-8855237;R-HSA-373746;R-HSA-399951;R-HSA-375151;R-HSA-418859;R-HSA-391867
	R-HSA-1500931	Cell-Cell communication	Cell-Cell communication (Homo sapiens)	0.0979971	1	4	0.0116644	6	0.00508647	130	4	427	0.0116644	0.0163329	0.0979971	6	60	0.00508647	9606	Homo sapiens	P35222	P35222	P02751;P35222;P02751;Q14192	P05556;P49023;Q96AC1;P06241;P35221;P46940	R-HSA-430341;R-HSA-446322;R-HSA-451377;R-HSA-8981534;R-HSA-432897;R-HSA-419002
	R-HSA-5339717	Misspliced LRP5 mutants have enhanced beta-catenin-dependent signaling	Disease (Homo sapiens)	0.101833	1	0	0.000538358	1	8.47745e-05	6	0	3	0.000538358	0.0169722	0.101833	1	1	8.47745e-05	9606	Homo sapiens	O94907	O94907			R-HSA-5339711
	R-HSA-5610780	Degradation of GLI1 by the proteasome	Signal Transduction (Homo sapiens)	0.129295	0	2	0.00538358	3	0.000508647	60	2	60	0.00538358	0.0215491	0.129295	3	6	0.000508647	9606	Homo sapiens			P35222;P10071	P49757;Q9UMX1	R-HSA-5610758;R-HSA-5610735;R-HSA-5610760
	R-HSA-8878166	Transcriptional regulation by RUNX2	Gene expression (Transcription) (Homo sapiens)	0.13177	2	2	0.0108569	12	0.00712106	121	2	471	0.0108569	0.0219617	0.13177	12	84	0.00712106	9606	Homo sapiens	P10071;P48436	P10071;P48436	P02751;P35222	P08648;P02452;Q9GZV5;P46937;P49841;P00519	R-HSA-8937864;R-HSA-8985227;R-HSA-9008475;R-HSA-8937820;R-HSA-9008476;R-HSA-8985644;R-HSA-8985343;R-HSA-8937856;R-HSA-2064932;R-HSA-8939667;R-HSA-8937844;R-HSA-9008215
	R-HSA-211163	AKT-mediated inactivation of FOXO1A	Developmental Biology (Homo sapiens)	0.135404	0	1	0.000358905	2	0.000169549	4	1	9	0.000358905	0.0225674	0.135404	2	2	0.000169549	9606	Homo sapiens			Q14192	Q12778	R-HSA-211178;R-HSA-211164
	R-HSA-2214320	Anchoring fibril formation	Extracellular matrix organization (Homo sapiens)	0.140658	1	0	0.0013459	1	0.000339098	15	0	0	0.0013459	0.0281316	0.140658	1	4	0.000339098	9606	Homo sapiens	P08123	P08123			R-HSA-2396234
	R-HSA-5632684	Hedgehog 'on' state	Signal Transduction (Homo sapiens)	0.140658	1	3	0.00762674	16	0.00313666	85	3	257	0.00762674	0.0250655	0.140658	16	37	0.00313666	9606	Homo sapiens	P10071	P10071	P35222;P10071;Q14192	O95995;P49757;Q6P1J9;Q9UMX1	R-HSA-5635860;R-HSA-5635856;R-HSA-5635859;R-HSA-5632668;R-HSA-5635839;R-HSA-5635845;R-HSA-5635846;R-HSA-5635841;R-HSA-5635843;R-HSA-5610723;R-HSA-5635842;R-HSA-5635853;R-HSA-5610735;R-HSA-5635855;R-HSA-5635854;R-HSA-5635848
	R-HSA-5339716	Misspliced GSK3beta mutants stabilize beta-catenin	Disease (Homo sapiens)	0.140658	1	0	0.0013459	1	8.47745e-05	15	0	0	0.0013459	0.0281316	0.140658	1	1	8.47745e-05	9606	Homo sapiens	P35222	P35222			R-HSA-5339713
	R-HSA-4839743	phosphorylation site mutants of CTNNB1 are not targeted to the proteasome by the destruction complex	Disease (Homo sapiens)	0.140658	1	0	0.0013459	4	0.000339098	15	0	0	0.0013459	0.0281316	0.140658	4	4	0.000339098	9606	Homo sapiens	P35222	P35222			R-HSA-4827388;R-HSA-4839635;R-HSA-4839634;R-HSA-4839638
	R-HSA-8941332	RUNX2 regulates genes involved in cell migration	Gene expression (Transcription) (Homo sapiens)	0.140658	0	1	0.000807537	1	0.000593421	9	1	5	0.000807537	0.0262803	0.140658	1	7	0.000593421	9606	Homo sapiens			P02751	P08648	R-HSA-8939667
	R-HSA-5358747	S33 mutants of beta-catenin aren't phosphorylated	Disease (Homo sapiens)	0.140658	1	0	0.0013459	1	8.47745e-05	15	0	0	0.0013459	0.0281316	0.140658	1	1	8.47745e-05	9606	Homo sapiens	P35222	P35222			R-HSA-4839634
	R-HSA-5358749	S37 mutants of beta-catenin aren't phosphorylated	Disease (Homo sapiens)	0.140658	1	0	0.0013459	1	8.47745e-05	15	0	0	0.0013459	0.0281316	0.140658	1	1	8.47745e-05	9606	Homo sapiens	P35222	P35222			R-HSA-4839635
	R-HSA-5358751	S45 mutants of beta-catenin aren't phosphorylated	Disease (Homo sapiens)	0.140658	1	0	0.0013459	1	8.47745e-05	15	0	0	0.0013459	0.0281316	0.140658	1	1	8.47745e-05	9606	Homo sapiens	P35222	P35222			R-HSA-4827388
	R-HSA-5358752	T41 mutants of beta-catenin aren't phosphorylated	Disease (Homo sapiens)	0.140658	1	0	0.0013459	1	8.47745e-05	15	0	0	0.0013459	0.0281316	0.140658	1	1	8.47745e-05	9606	Homo sapiens	P35222	P35222			R-HSA-4839638
	R-HSA-373753	Nephrin family interactions	Cell-Cell communication (Homo sapiens)	0.141708	0	2	0.00206371	2	0.00110207	23	2	123	0.00206371	0.0283415	0.141708	2	13	0.00110207	9606	Homo sapiens			P35222;P02751	P06241;P46940	R-HSA-451377;R-HSA-8981534
	R-HSA-1266738	Developmental Biology	Developmental Biology (Homo sapiens)	0.141915	8	5	0.0945716	26	0.0409461	1054	5	2423	0.0945716	0.0283831	0.141915	26	483	0.0409461	9606	Homo sapiens	P12110;P02461;P12109;P20849;P20908;P01137;P35222;P12111	P12110;P02461;P12109;P20849;P20908;P01137;P35222;P12111	P01137;P35222;P35453;P02751;Q14192	P05412;Q12778;P49639;P01137;P06241;P12931;Q92793;P49841;O00482-1;P00519;P08575	R-HSA-8855237;R-HSA-399951;R-HSA-211272;R-HSA-210773;R-HSA-211164;R-HSA-9011241;R-HSA-375140;R-HSA-560491;R-HSA-381283;R-HSA-5617458;R-HSA-5617661;R-HSA-211178;R-HSA-375151;R-HSA-418859;R-HSA-376117;R-HSA-448951;R-HSA-376119;R-HSA-449200;R-HSA-373746;R-HSA-448958;R-HSA-381309;R-HSA-5617452;R-HSA-448957;R-HSA-376121;R-HSA-5617896;R-HSA-391867
	R-HSA-5610783	Degradation of GLI2 by the proteasome	Signal Transduction (Homo sapiens)	0.157136	0	2	0.00538358	2	0.000423872	60	2	87	0.00538358	0.0314272	0.157136	2	5	0.000423872	9606	Homo sapiens			P35222;P10071	P49841;Q9UMX1	R-HSA-5610757;R-HSA-5610730
	R-HSA-2032785	YAP1- and WWTR1 (TAZ)-stimulated gene expression	Signal Transduction (Homo sapiens)	0.157136	0	2	0.00143562	8	0.00076297	16	2	137	0.00143562	0.0314272	0.157136	8	9	0.00076297	9606	Homo sapiens			P02751;P35222	Q9GZV5;Q99593;P46937;P29279	R-HSA-2032781;R-HSA-8871266;R-HSA-2032794;R-HSA-8871265;R-HSA-2032775;R-HSA-1989766;R-HSA-8871260;R-HSA-2064932
	R-HSA-5610785	GLI3 is processed to GLI3R by the proteasome	Signal Transduction (Homo sapiens)	0.15911	1	2	0.00538358	5	0.000423872	60	2	90	0.00538358	0.0318219	0.15911	5	5	0.000423872	9606	Homo sapiens	P10071	P10071	P35222;P10071	P49841;Q9UMX1	R-HSA-5610720;R-HSA-5610754;R-HSA-5610722;R-HSA-5610732;R-HSA-5610746
	R-HSA-196299	Beta-catenin phosphorylation cascade	Signal Transduction (Homo sapiens)	0.15912	1	0	0.00152535	4	0.000339098	17	0	0	0.00152535	0.0318241	0.15912	4	4	0.000339098	9606	Homo sapiens	P35222	P35222			R-HSA-195283;R-HSA-195318;R-HSA-195287;R-HSA-195300
	R-HSA-446728	Cell junction organization	Cell-Cell communication (Homo sapiens)	0.161782	1	3	0.00825482	4	0.00313666	92	3	296	0.00825482	0.0323563	0.161782	4	37	0.00313666	9606	Homo sapiens	P35222	P35222	P02751;P35222;Q14192	P05556;P49023;Q96AC1;P35221	R-HSA-430341;R-HSA-446322;R-HSA-432897;R-HSA-419002
	R-HSA-2243919	Crosslinking of collagen fibrils	Extracellular matrix organization (Homo sapiens)	0.162225	1	0	0.00161507	11	0.00110207	18	0	0	0.00161507	0.0336652	0.162225	11	13	0.00110207	9606	Homo sapiens	P08123	P08123			R-HSA-2395302;R-HSA-2395223;R-HSA-2243926;R-HSA-2395314;R-HSA-2395324;R-HSA-2395340;R-HSA-2243931;R-HSA-2002466;R-HSA-2395257;R-HSA-2395322;R-HSA-2250301
	R-HSA-5635851	GLI proteins bind promoters of Hh responsive genes to promote transcription	Signal Transduction (Homo sapiens)	0.162225	1	0	0.000269179	3	0.000339098	3	0	15	0.000269179	0.0336652	0.162225	3	4	0.000339098	9606	Homo sapiens	P10071	P10071			R-HSA-5635846;R-HSA-5635853;R-HSA-5635848
	R-HSA-168277	Influenza Virus Induced Apoptosis	Disease (Homo sapiens)	0.162225	1	0	0.000358905	1	0.000169549	4	0	14	0.000358905	0.0336652	0.162225	1	2	0.000169549	9606	Homo sapiens	P01137	P01137			R-HSA-168865
	R-HSA-114608	Platelet degranulation	Hemostasis (Homo sapiens)	0.162225	2	0	0.011485	1	0.000932519	128	0	31	0.011485	0.0367109	0.162225	1	11	0.000932519	9606	Homo sapiens	P01137;P02751	P01137;P02751			R-HSA-481007
	R-HSA-9617629	Regulation of FOXO transcriptional activity by acetylation	Gene expression (Transcription) (Homo sapiens)	0.162225	0	2	0.000897263	3	0.00076297	10	2	167	0.000897263	0.0405562	0.162225	3	9	0.00076297	9606	Homo sapiens			P35222;Q14192	Q12778;Q92793	R-HSA-9626962;R-HSA-9626928;R-HSA-9626945
	R-HSA-8943724	Regulation of PTEN gene transcription	Signal Transduction (Homo sapiens)	0.162225	0	2	0.00538358	2	0.00127162	60	2	99	0.00538358	0.0354627	0.162225	2	15	0.00127162	9606	Homo sapiens			P35222;P35453	P05412;P18146	R-HSA-8944078;R-HSA-8944047
	R-HSA-4791275	Signaling by WNT in cancer	Signaling by WNT in cancer	0.162225	2	1	0.0030507	9	0.00118684	34	1	126	0.0030507	0.0338252	0.162225	9	14	0.00118684	9606	Homo sapiens	P35222;O94907	P35222;O94907	P35222	P25054;Q5JTC6;O15169;P49841	R-HSA-5339713;R-HSA-4827388;R-HSA-4791278;R-HSA-4839635;R-HSA-4839634;R-HSA-4839746;R-HSA-5339711;R-HSA-4839638;R-HSA-4839734
	R-HSA-5656121	Translesion synthesis by POLI	DNA Repair (Homo sapiens)	0.162225	0	1	0.00152535	2	0.000254323	17	1	3	0.00152535	0.035503	0.162225	2	3	0.000254323	9606	Homo sapiens			Q14192	Q9UBZ9	R-HSA-5656158;R-HSA-5656105
	R-HSA-5655862	Translesion synthesis by POLK	DNA Repair (Homo sapiens)	0.162225	0	1	0.00152535	2	0.000254323	17	1	3	0.00152535	0.035503	0.162225	2	3	0.000254323	9606	Homo sapiens			Q14192	Q9UBZ9	R-HSA-5655965;R-HSA-5655835
	R-HSA-5693606	DNA Double Strand Break Response	DNA Repair (Homo sapiens)	0.167654	0	3	0.00538358	4	0.0036453	60	3	373	0.00538358	0.0419134	0.167654	4	43	0.0036453	9606	Homo sapiens			P02751;P35222;Q14192	P38398;P52292;P00519	R-HSA-5684006;R-HSA-5659781;R-HSA-5686578;R-HSA-5684008
	R-HSA-8941856	RUNX3 regulates NOTCH signaling	Gene expression (Transcription) (Homo sapiens)	0.17128	0	1	0.00125617	2	0.000593421	14	1	11	0.00125617	0.0428201	0.17128	2	7	0.000593421	9606	Homo sapiens			P35222	Q13761	R-HSA-8878193;R-HSA-8878220
	R-HSA-6804759	Regulation of TP53 Activity through Association with Co-factors	Gene expression (Transcription) (Homo sapiens)	0.180001	0	2	0.00125617	2	0.000932519	14	2	166	0.00125617	0.0450003	0.180001	2	11	0.000932519	9606	Homo sapiens			P01137;Q14192	Q8N9N5;Q12837	R-HSA-6804425;R-HSA-3221982
	R-HSA-5663220	RHO GTPases Activate Formins	Signal Transduction (Homo sapiens)	0.180001	0	2	0.0126514	1	0.00228891	141	2	44	0.0126514	0.0450003	0.180001	1	27	0.00228891	9606	Homo sapiens			P02751;Q14192	P05556	R-HSA-5666049
	R-HSA-2173782	Binding and Uptake of Ligands by Scavenger Receptors	Vesicle-mediated transport (Homo sapiens)	0.181817	2	0	0.0115747	1	0.00279756	129	0	51	0.0115747	0.0454543	0.181817	1	33	0.00279756	9606	Homo sapiens	P02461;P08123	P02461;P08123			R-HSA-3221843
	R-HSA-8941858	Regulation of RUNX3 expression and activity	Gene expression (Transcription) (Homo sapiens)	0.18364	1	1	0.00493495	9	0.00076297	55	1	128	0.00493495	0.0459101	0.18364	9	9	0.00076297	9606	Homo sapiens	P01137	P01137	P35222	Q13761;P12931	R-HSA-8952408;R-HSA-8952382;R-HSA-8952399;R-HSA-8937807;R-HSA-8937792;R-HSA-8865454;R-HSA-8952419;R-HSA-8952371;R-HSA-8937814
	R-HSA-2122948	Activated NOTCH1 Transmits Signal to the Nucleus	Signal Transduction (Homo sapiens)	0.190844	0	1	0.00278152	1	0.00178026	31	1	60	0.00278152	0.154451	0.190844	1	21	0.00178026	9606	Homo sapiens			P35222	P49757	R-HSA-1980128
	R-HSA-9603381	Activated NTRK3 signals through PI3K	Signal Transduction (Homo sapiens)	0.190844	0	1	0.000538358	1	0.000423872	6	1	59	0.000538358	0.113096	0.190844	1	5	0.000423872	9606	Homo sapiens			P35222	P12931	R-HSA-9603419
	R-HSA-5617472	Activation of anterior HOX genes in hindbrain development during early embryogenesis	Developmental Biology (Homo sapiens)	0.190844	0	3	0.0081651	4	0.0036453	91	3	630	0.0081651	0.14982	0.190844	4	43	0.0036453	9606	Homo sapiens			P01137;P35222;P35453	P05412;P49639;Q92793	R-HSA-5617458;R-HSA-5617661;R-HSA-5617452;R-HSA-5617896
	R-HSA-5619507	Activation of HOX genes during differentiation	Developmental Biology (Homo sapiens)	0.190844	0	3	0.0081651	4	0.0036453	91	3	630	0.0081651	0.14982	0.190844	4	43	0.0036453	9606	Homo sapiens			P01137;P35222;P35453	P05412;P49639;Q92793	R-HSA-5617458;R-HSA-5617661;R-HSA-5617452;R-HSA-5617896
	R-HSA-442755	Activation of NMDA receptors and postsynaptic events	Neuronal System (Homo sapiens)	0.190844	0	2	0.008524	3	0.00593421	95	2	186	0.008524	0.0948195	0.190844	3	70	0.00593421	9606	Homo sapiens			P02751;P35222	P52292;P12931	R-HSA-9619127;R-HSA-9612085;R-HSA-112282
	R-HSA-450341	Activation of the AP-1 family of transcription factors	Immune System (Homo sapiens)	0.190844	0	1	0.000897263	3	0.000423872	10	1	107	0.000897263	0.190844	0.190844	3	5	0.000423872	9606	Homo sapiens			P35453	P05412	R-HSA-450292;R-HSA-168440;R-HSA-168136
	R-HSA-8866907	Activation of the TFAP2 (AP-2) family of transcription factors	Gene expression (Transcription) (Homo sapiens)	0.190844	0	1	0.00107672	1	0.000339098	12	1	86	0.00107672	0.167286	0.190844	1	4	0.000339098	9606	Homo sapiens			P35222	Q92793	R-HSA-8864307
	R-HSA-418990	Adherens junctions interactions	Cell-Cell communication (Homo sapiens)	0.190844	1	1	0.00296097	1	0.00135639	33	1	85	0.00296097	0.189294	0.190844	1	16	0.00135639	9606	Homo sapiens	P35222	P35222	P35222	P35221	R-HSA-419002
	R-HSA-977225	Amyloid fiber formation	Metabolism of proteins (Homo sapiens)	0.190844	1	1	0.00717811	7	0.00279756	80	1	203	0.00717811	0.0936508	0.190844	7	33	0.00279756	9606	Homo sapiens	Q15582	Q15582	P01137	P05067	R-HSA-976734;R-HSA-8871494;R-HSA-9010091;R-HSA-9010096;R-HSA-5692495;R-HSA-9010034;R-HSA-977136
	R-HSA-390471	Association of TriC/CCT with target proteins during biosynthesis	Metabolism of proteins (Homo sapiens)	0.190844	0	1	0.00349933	1	0.000169549	39	1	3	0.00349933	0.0768485	0.190844	1	2	0.000169549	9606	Homo sapiens			Q14192	Q9NYA1	R-HSA-391266
	R-HSA-4608870	Asymmetric localization of PCP proteins	Signal Transduction (Homo sapiens)	0.190844	0	1	0.00574249	1	0.000593421	64	1	36	0.00574249	0.173632	0.190844	1	7	0.000593421	9606	Homo sapiens			P35222	Q14160	R-HSA-4608862
	R-HSA-380994	ATF4 activates genes in response to endoplasmic reticulum stress	Metabolism of proteins (Homo sapiens)	0.190844	0	1	0.00224316	1	0.000593421	25	1	75	0.00224316	0.167286	0.190844	1	7	0.000593421	9606	Homo sapiens			Q14192	P18847	R-HSA-1791173
	R-HSA-5467340	AXIN missense mutants destabilize the destruction complex	Disease (Homo sapiens)	0.190844	0	1	0.00125617	1	8.47745e-05	14	1	74	0.00125617	0.147962	0.190844	1	1	8.47745e-05	9606	Homo sapiens			P35222	P25054;Q5JTC6;P49841	R-HSA-4839734
	R-HSA-4839735	AXIN mutants destabilize the destruction complex, activating WNT signaling	Disease (Homo sapiens)	0.190844	0	1	0.00125617	1	8.47745e-05	14	1	74	0.00125617	0.147962	0.190844	1	1	8.47745e-05	9606	Homo sapiens			P35222	P25054;Q5JTC6;P49841	R-HSA-4839734
	R-HSA-4086398	Ca2+ pathway	Signal Transduction (Homo sapiens)	0.190844	1	0	0.00529385	3	0.00228891	59	0	38	0.00529385	0.165692	0.190844	3	27	0.00228891	9606	Homo sapiens	P35222	P35222			R-HSA-8944362;R-HSA-4411383;R-HSA-4411365
	R-HSA-111933	Calmodulin induced events	Signal Transduction (Homo sapiens)	0.190844	0	1	0.0030507	2	0.00186504	34	1	74	0.0030507	0.184626	0.190844	2	22	0.00186504	9606	Homo sapiens			P02751	P52292	R-HSA-9619127;R-HSA-112282
	R-HSA-111997	CaM pathway	Signal Transduction (Homo sapiens)	0.190844	0	1	0.0030507	2	0.00194981	34	1	74	0.0030507	0.184626	0.190844	2	23	0.00194981	9606	Homo sapiens			P02751	P52292	R-HSA-9619127;R-HSA-112282
	R-HSA-111932	CaMK IV-mediated phosphorylation of CREB	Signal Transduction (Homo sapiens)	0.190844	0	1	0.000897263	2	0.00110207	10	1	67	0.000897263	0.134839	0.190844	2	13	0.00110207	9606	Homo sapiens			P02751	P52292	R-HSA-9619127;R-HSA-112282
	R-HSA-389359	CD28 dependent Vav1 pathway	Immune System (Homo sapiens)	0.190844	0	1	0.00107672	1	0.000508647	12	1	46	0.00107672	0.101169	0.190844	1	6	0.000508647	9606	Homo sapiens			P02751	P06241	R-HSA-389354
	R-HSA-202733	Cell surface interactions at the vascular wall	Hemostasis (Homo sapiens)	0.190844	3	1	0.021983	10	0.00542557	245	1	597	0.021983	0.0684617	0.190844	10	64	0.00542557	9606	Homo sapiens	P08123;P01137;P02751	P08123;P01137;P02751	P35222	P16284	R-HSA-114577;R-HSA-202723;R-HSA-210290;R-HSA-210304;R-HSA-210294;R-HSA-210277;R-HSA-210283;R-HSA-8870732;R-HSA-202702;R-HSA-210285
	R-HSA-8964026	Chylomicron clearance	Transport of small molecules (Homo sapiens)	0.190844	0	1	0.000448632	1	0.000339098	5	1	25	0.000448632	0.051891	0.190844	1	4	0.000339098	9606	Homo sapiens			Q14192	Q5SW96	R-HSA-174706
	R-HSA-442729	CREB1 phosphorylation through the activation of CaMKII/CaMKK/CaMKIV cascasde	Neuronal System (Homo sapiens)	0.190844	0	1	0.000717811	2	0.000847745	8	1	67	0.000717811	0.131528	0.190844	2	10	0.000847745	9606	Homo sapiens			P02751	P52292	R-HSA-9619127;R-HSA-112282
	R-HSA-399956	CRMPs in Sema3A signaling	Developmental Biology (Homo sapiens)	0.190844	0	1	0.00143562	1	0.000423872	16	1	45	0.00143562	0.109704	0.190844	1	5	0.000423872	9606	Homo sapiens			P35222	P49841	R-HSA-399951
	R-HSA-69273	Cyclin A/B1/B2 associated events during G2/M transition	Cell Cycle (Homo sapiens)	0.190844	0	1	0.00224316	2	0.00211936	25	1	66	0.00224316	0.1447	0.190844	2	25	0.00211936	9606	Homo sapiens			P35222	Q08050	R-HSA-4088141;R-HSA-4088024
	R-HSA-111461	Cytochrome c-mediated apoptotic response	Programmed Cell Death (Homo sapiens)	0.190844	0	1	0.00116644	2	0.00101729	13	1	91	0.00116644	0.167286	0.190844	2	12	0.00101729	9606	Homo sapiens			Q14192	Q9Y2G2	R-HSA-114256;R-HSA-6805426
	R-HSA-3769402	Deactivation of the beta-catenin transactivating complex	Signal Transduction (Homo sapiens)	0.190844	2	1	0.00376851	11	0.00118684	42	1	387	0.00376851	0.183581	0.190844	11	14	0.00118684	9606	Homo sapiens	P48436;P35222	P48436;P35222	P35222	Q9NSA3;P25054;Q9Y297	R-HSA-3361751;R-HSA-5368580;R-HSA-3769391;R-HSA-3772430;R-HSA-3769393;R-HSA-3364042;R-HSA-3769392;R-HSA-3769394;R-HSA-5665608;R-HSA-3769383;R-HSA-5626938
	R-HSA-5663202	Diseases of signal transduction	Disease (Homo sapiens)	0.190844	4	1	0.0361597	36	0.0239912	403	1	785	0.0361597	0.149173	0.190844	36	283	0.0239912	9606	Homo sapiens	P01137;P35222;O94907;P02751	P01137;P35222;O94907;P02751	P35222	P25054;Q5JTC6;O15169;Q92793;P49841	R-HSA-6802919;R-HSA-6802918;R-HSA-2220964;R-HSA-6802914;R-HSA-6803234;R-HSA-6803233;R-HSA-6802912;R-HSA-6802926;R-HSA-3656382;R-HSA-2220971;R-HSA-6802925;R-HSA-4839746;R-HSA-6802922;R-HSA-6802921;R-HSA-5339713;R-HSA-6802935;R-HSA-6802934;R-HSA-6802933;R-HSA-6802932;R-HSA-6802943;R-HSA-6802942;R-HSA-4839635;R-HSA-4839634;R-HSA-4839638;R-HSA-3645780;R-HSA-4791278;R-HSA-3642203;R-HSA-5339711;R-HSA-4…
	R-HSA-5693532	DNA Double-Strand Break Repair	DNA Repair (Homo sapiens)	0.190844	0	3	0.0132795	5	0.0089861	148	3	593	0.0132795	0.135681	0.190844	5	106	0.0089861	9606	Homo sapiens			P02751;P35222;Q14192	P38398;P52292;P00519	R-HSA-5684006;R-HSA-5659781;R-HSA-5686578;R-HSA-5686587;R-HSA-5684008
	R-HSA-5334118	DNA methylation	Gene expression (Transcription) (Homo sapiens)	0.190844	0	1	0.0030507	1	0.000593421	34	1	22	0.0030507	0.0942845	0.190844	1	7	0.000593421	9606	Homo sapiens			P35222	P26358	R-HSA-5334160
	R-HSA-180786	Extension of Telomeres	Cell Cycle (Homo sapiens)	0.190844	0	1	0.00269179	1	0.00178026	30	1	70	0.00269179	0.164095	0.190844	1	21	0.00178026	9606	Homo sapiens			P35222	O14746;Q9Y265	R-HSA-164616
	R-HSA-111458	Formation of apoptosome	Programmed Cell Death (Homo sapiens)	0.190844	0	1	0.00098699	2	0.000847745	11	1	91	0.00098699	0.167286	0.190844	2	10	0.000847745	9606	Homo sapiens			Q14192	Q9Y2G2	R-HSA-114256;R-HSA-6805426
	R-HSA-75094	Formation of the Editosome	Metabolism of RNA (Homo sapiens)	0.190844	0	1	0.000717811	1	0.000169549	8	1	22	0.000717811	0.0554959	0.190844	1	2	0.000169549	9606	Homo sapiens			Q14192	Q9NQ94	R-HSA-77608
	R-HSA-354194	GRB2:SOS provides linkage to MAPK signaling for Integrins	Hemostasis (Homo sapiens)	0.190844	1	0	0.0013459	2	0.000169549	15	0	18	0.0013459	0.0608785	0.190844	2	2	0.000169549	9606	Homo sapiens	P02751	P02751			R-HSA-354165;R-HSA-354087
	R-HSA-5358346	Hedgehog ligand biogenesis	Signal Transduction (Homo sapiens)	0.190844	0	1	0.00583221	2	0.00127162	65	1	37	0.00583221	0.176788	0.190844	2	15	0.00127162	9606	Homo sapiens			P01137	P07237	R-HSA-5358336;R-HSA-5358340
	R-HSA-5610787	Hedgehog 'off' state	Signal Transduction (Homo sapiens)	0.190844	1	2	0.0102288	20	0.00271278	114	2	156	0.0102288	0.0861634	0.190844	20	32	0.00271278	9606	Homo sapiens	P10071	P10071	P35222;P10071	P49757;P49841;Q9UMX1	R-HSA-5612508;R-HSA-5612510;R-HSA-5610746;R-HSA-5617413;R-HSA-5610757;R-HSA-5617412;R-HSA-5610758;R-HSA-5610720;R-HSA-5617408;R-HSA-5610752;R-HSA-5610723;R-HSA-5610754;R-HSA-5610722;R-HSA-5617410;R-HSA-5610732;R-HSA-5610735;R-HSA-5610767;R-HSA-5610766;R-HSA-5610760;R-HSA-5610730
	R-HSA-168253	Host Interactions with Influenza Factors	Disease (Homo sapiens)	0.190844	1	0	0.00448632	1	0.000678196	50	0	47	0.00448632	0.167286	0.190844	1	8	0.000678196	9606	Homo sapiens	P01137	P01137			R-HSA-168865
	R-HSA-198933	Immunoregulatory interactions between a Lymphoid and a non-Lymphoid cell	Immune System (Homo sapiens)	0.190844	2	1	0.0266487	3	0.0036453	297	1	326	0.0266487	0.105438	0.190844	3	43	0.0036453	9606	Homo sapiens	P02461;P08123	P02461;P08123	P35222	P12830	R-HSA-5696356;R-HSA-5696357;R-HSA-199079
	R-HSA-8876493	InlA-mediated entry of Listeria monocytogenes into host cells	Disease (Homo sapiens)	0.190844	1	1	0.000897263	5	0.000423872	10	1	54	0.000897263	0.111401	0.190844	5	5	0.000423872	9606	Homo sapiens	P35222	P35222	P35222	P12931	R-HSA-8876948;R-HSA-8876993;R-HSA-8876497;R-HSA-8877003;R-HSA-112333
	R-HSA-448424	Interleukin-17 signaling	Immune System (Homo sapiens)	0.190844	0	2	0.00637057	4	0.00296711	71	2	175	0.00637057	0.0686073	0.190844	4	35	0.00296711	9606	Homo sapiens			P35222;P35453	P05412;P19838	R-HSA-450292;R-HSA-451634;R-HSA-168440;R-HSA-168136
	R-HSA-8964038	LDL clearance	Transport of small molecules (Homo sapiens)	0.190844	0	1	0.0017048	1	0.00152594	19	1	36	0.0017048	0.0890875	0.190844	1	18	0.00152594	9606	Homo sapiens			Q14192	Q5SW96	R-HSA-171141
	R-HSA-8876384	Listeria monocytogenes entry into host cells	Disease (Homo sapiens)	0.190844	1	1	0.00206371	5	0.00110207	23	1	70	0.00206371	0.154451	0.190844	5	13	0.00110207	9606	Homo sapiens	P35222	P35222	P35222	P12931	R-HSA-8876948;R-HSA-8876993;R-HSA-8876497;R-HSA-8877003;R-HSA-112333
	R-HSA-9620244	Long-term potentiation	Neuronal System (Homo sapiens)	0.190844	0	1	0.00224316	1	0.000593421	25	1	50	0.00224316	0.133185	0.190844	1	7	0.000593421	9606	Homo sapiens			P35222	P12931	R-HSA-9612085
	R-HSA-3304349	Loss of Function of SMAD2/3 in Cancer	Disease (Homo sapiens)	0.190844	1	0	0.000628084	1	0.000169549	7	0	32	0.000628084	0.0662314	0.190844	1	2	0.000169549	9606	Homo sapiens	P01137	P01137			R-HSA-3304394
	R-HSA-3134973	LRR FLII-interacting protein 1 (LRRFIP1) activates type I IFN production	Immune System (Homo sapiens)	0.190844	1	0	0.000448632	4	0.000423872	5	0	85	0.000448632	0.156066	0.190844	4	5	0.000423872	9606	Homo sapiens	P35222	P35222			R-HSA-3134904;R-HSA-3134901;R-HSA-3134883;R-HSA-3134914
	R-HSA-450294	MAP kinase activation	Immune System (Homo sapiens)	0.190844	0	2	0.00565276	4	0.00271278	63	2	175	0.00565276	0.0644308	0.190844	4	32	0.00271278	9606	Homo sapiens			P35222;P35453	P05412;P19838	R-HSA-450292;R-HSA-451634;R-HSA-168440;R-HSA-168136
	R-HSA-5674135	MAP2K and MAPK activation	Signal Transduction (Homo sapiens)	0.190844	1	0	0.00358905	4	0.000678196	40	0	0	0.00358905	0.0733225	0.190844	4	8	0.000678196	9606	Homo sapiens	P02751	P02751			R-HSA-5672980;R-HSA-5672978;R-HSA-5672972;R-HSA-5672973
	R-HSA-5684264	MAP3K8 (TPL2)-dependent MAPK1/3 activation	Immune System (Homo sapiens)	0.190844	0	1	0.00143562	1	0.000678196	16	1	34	0.00143562	0.0768485	0.190844	1	8	0.000678196	9606	Homo sapiens			P35222	P19838	R-HSA-451634
	R-HSA-5683057	MAPK family signaling cascades	Signal Transduction (Homo sapiens)	0.190844	1	2	0.0273665	7	0.00729061	305	2	461	0.0273665	0.153431	0.190844	7	86	0.00729061	9606	Homo sapiens	P02751	P02751	P35453;Q14192	P05412;Q12778	R-HSA-5672980;R-HSA-5672978;R-HSA-5692785;R-HSA-5672972;R-HSA-5672973;R-HSA-5692779;R-HSA-5692761
	R-HSA-5687128	MAPK6/MAPK4 signaling	Signal Transduction (Homo sapiens)	0.190844	0	2	0.00798564	3	0.00339098	89	2	329	0.00798564	0.176065	0.190844	3	40	0.00339098	9606	Homo sapiens			P35453;Q14192	P05412;Q12778	R-HSA-5692785;R-HSA-5692779;R-HSA-5692761
	R-HSA-75072	mRNA Editing	Metabolism of RNA (Homo sapiens)	0.190844	0	1	0.000897263	1	0.00076297	10	1	27	0.000897263	0.0680091	0.190844	1	9	0.00076297	9606	Homo sapiens			Q14192	Q9NQ94	R-HSA-77608
	R-HSA-72200	mRNA Editing: C to U Conversion	Metabolism of RNA (Homo sapiens)	0.190844	0	1	0.000717811	1	0.000254323	8	1	22	0.000717811	0.0554959	0.190844	1	3	0.000254323	9606	Homo sapiens			Q14192	Q9NQ94	R-HSA-77608
	R-HSA-975871	MyD88 cascade initiated on plasma membrane	Immune System (Homo sapiens)	0.190844	0	2	0.00762674	4	0.00491692	85	2	350	0.00762674	0.174024	0.190844	4	58	0.00491692	9606	Homo sapiens			P35222;P35453	P05412;P19838	R-HSA-450292;R-HSA-451634;R-HSA-168440;R-HSA-168136
	R-HSA-975155	MyD88 dependent cascade initiated on endosome	Immune System (Homo sapiens)	0.190844	0	2	0.0081651	4	0.00534079	91	2	359	0.0081651	0.183581	0.190844	4	63	0.00534079	9606	Homo sapiens			P35222;P35453	P05412;P19838	R-HSA-450292;R-HSA-451634;R-HSA-168440;R-HSA-168136
	R-HSA-6807004	Negative regulation of MET activity	Signal Transduction (Homo sapiens)	0.190844	0	1	0.00188425	1	0.000847745	21	1	41	0.00188425	0.102882	0.190844	1	10	0.000847745	9606	Homo sapiens			P35222	Q12913	R-HSA-6807008
	R-HSA-3772470	Negative regulation of TCF-dependent signaling by WNT ligand antagonists	Signal Transduction (Homo sapiens)	0.190844	1	0	0.0013459	2	0.000423872	15	0	14	0.0013459	0.0500835	0.190844	2	5	0.000423872	9606	Homo sapiens	O94907	O94907			R-HSA-3769401;R-HSA-5368586
	R-HSA-418886	Netrin mediated repulsion signals	Developmental Biology (Homo sapiens)	0.190844	0	1	0.000717811	1	0.000339098	8	1	88	0.000717811	0.164095	0.190844	1	4	0.000339098	9606	Homo sapiens			P35222	P12931	R-HSA-418859
	R-HSA-9009391	Non-genomic estrogen signaling	Signal Transduction (Homo sapiens)	0.190844	0	2	0.00708838	2	0.00322143	79	2	296	0.00708838	0.149902	0.190844	2	38	0.00322143	9606	Homo sapiens			P35222;Q14192	Q9NYA1;P12931	R-HSA-9625814;R-HSA-9021596
	R-HSA-1251985	Nuclear signaling by ERBB4	Signal Transduction (Homo sapiens)	0.190844	0	2	0.00251234	2	0.00186504	28	2	161	0.00251234	0.0482145	0.190844	2	22	0.00186504	9606	Homo sapiens			P35222;Q14192	P05814;P46937	R-HSA-1254290;R-HSA-1254251
	R-HSA-6802957	Oncogenic MAPK signaling	Disease (Homo sapiens)	0.190844	1	0	0.00726783	20	0.00288233	81	0	14	0.00726783	0.165692	0.190844	20	34	0.00288233	9606	Homo sapiens	P02751	P02751			R-HSA-6802919;R-HSA-6802918;R-HSA-6802914;R-HSA-6803234;R-HSA-6803233;R-HSA-6802912;R-HSA-6802926;R-HSA-6802925;R-HSA-6802922;R-HSA-6802921;R-HSA-6802935;R-HSA-6802934;R-HSA-6802933;R-HSA-6802932;R-HSA-6802911;R-HSA-6802943;R-HSA-6802910;R-HSA-6803230;R-HSA-6802942;R-HSA-6803227
	R-HSA-416700	Other semaphorin interactions	Developmental Biology (Homo sapiens)	0.190844	0	1	0.0017048	1	0.00076297	19	1	28	0.0017048	0.0750872	0.190844	1	9	0.00076297	9606	Homo sapiens			P35222	P08575	R-HSA-373746
	R-HSA-372708	p130Cas linkage to MAPK signaling for integrins	Hemostasis (Homo sapiens)	0.190844	1	0	0.0013459	3	0.000254323	15	0	85	0.0013459	0.167286	0.190844	3	3	0.000254323	9606	Homo sapiens	P02751	P02751			R-HSA-372693;R-HSA-372705;R-HSA-372697
	R-HSA-6802955	Paradoxical activation of RAF signaling by kinase inactive BRAF	Disease (Homo sapiens)	0.190844	1	0	0.00403769	4	0.000593421	45	0	14	0.00403769	0.106299	0.190844	4	7	0.000593421	9606	Homo sapiens	P02751	P02751			R-HSA-6802918;R-HSA-6803234;R-HSA-6802943;R-HSA-6802942
	R-HSA-210990	PECAM1 interactions	Hemostasis (Homo sapiens)	0.190844	0	1	0.00107672	6	0.000593421	12	1	90	0.00107672	0.170465	0.190844	6	7	0.000593421	9606	Homo sapiens			P35222	P16284	R-HSA-210290;R-HSA-210304;R-HSA-210294;R-HSA-210277;R-HSA-210283;R-HSA-210285
	R-HSA-381042	PERK regulates gene expression	Metabolism of proteins (Homo sapiens)	0.190844	0	1	0.00269179	1	0.000932519	30	1	77	0.00269179	0.175211	0.190844	1	11	0.000932519	9606	Homo sapiens			Q14192	P18847	R-HSA-1791173
	R-HSA-174824	Plasma lipoprotein assembly, remodeling, and clearance	Transport of small molecules (Homo sapiens)	0.190844	0	2	0.0064603	3	0.00703628	72	2	168	0.0064603	0.0701965	0.190844	3	83	0.00703628	9606	Homo sapiens			P02751;Q14192	P08519;Q5SW96	R-HSA-174706;R-HSA-171141;R-HSA-176879
	R-HSA-8964043	Plasma lipoprotein clearance	Transport of small molecules (Homo sapiens)	0.190844	0	1	0.00296097	2	0.00288233	33	1	47	0.00296097	0.128204	0.190844	2	34	0.00288233	9606	Homo sapiens			Q14192	Q5SW96	R-HSA-174706;R-HSA-171141
	R-HSA-8963899	Plasma lipoprotein remodeling	Transport of small molecules (Homo sapiens)	0.190844	0	1	0.00296097	1	0.00254323	33	1	73	0.00296097	0.178361	0.190844	1	30	0.00254323	9606	Homo sapiens			P02751	P08519	R-HSA-176879
	R-HSA-76002	Platelet activation, signaling and aggregation	Hemostasis (Homo sapiens)	0.190844	3	0	0.0235083	27	0.00966429	262	0	492	0.0235083	0.151171	0.190844	27	114	0.00966429	9606	Homo sapiens	P08123;P01137;P02751	P08123;P01137;P02751			R-HSA-139842;R-HSA-429441;R-HSA-354124;R-HSA-443402;R-HSA-372693;R-HSA-430096;R-HSA-453200;R-HSA-354066;R-HSA-443418;R-HSA-372697;R-HSA-354073;R-HSA-429529;R-HSA-354149;R-HSA-429415;R-HSA-354087;R-HSA-372705;R-HSA-481007;R-HSA-114600;R-HSA-377644;R-HSA-377641;R-HSA-377640;R-HSA-377643;R-HSA-354165;R-HSA-437118;R-HSA-453183;R-HSA-430076;R-HSA-430073
	R-HSA-76009	Platelet Aggregation (Plug Formation)	Hemostasis (Homo sapiens)	0.190844	2	0	0.00358905	16	0.00228891	40	0	195	0.00358905	0.0686073	0.190844	16	27	0.00228891	9606	Homo sapiens	P08123;P02751	P08123;P02751			R-HSA-354149;R-HSA-429415;R-HSA-354087;R-HSA-372705;R-HSA-429441;R-HSA-377644;R-HSA-354124;R-HSA-377641;R-HSA-377640;R-HSA-377643;R-HSA-372693;R-HSA-354165;R-HSA-354066;R-HSA-372697;R-HSA-354073;R-HSA-429529
	R-HSA-432142	Platelet sensitization by LDL	Hemostasis (Homo sapiens)	0.190844	0	1	0.00152535	4	0.00076297	17	1	80	0.00152535	0.164095	0.190844	4	9	0.00076297	9606	Homo sapiens			P35222	P16284	R-HSA-210294;R-HSA-210277;R-HSA-432143;R-HSA-435244
	R-HSA-438064	Post NMDA receptor activation events	Neuronal System (Homo sapiens)	0.190844	0	2	0.00744729	3	0.00330621	83	2	133	0.00744729	0.0623769	0.190844	3	39	0.00330621	9606	Homo sapiens			P02751;P35222	P52292;P12931	R-HSA-9619127;R-HSA-9612085;R-HSA-112282
	R-HSA-5693565	Recruitment and ATM-mediated phosphorylation of repair and signaling proteins at DNA double strand breaks	DNA Repair (Homo sapiens)	0.190844	0	2	0.00529385	2	0.00296711	59	2	320	0.00529385	0.147926	0.190844	2	35	0.00296711	9606	Homo sapiens			P35222;Q14192	P38398;P00519	R-HSA-5659781;R-HSA-5686578
	R-HSA-186712	Regulation of beta-cell development	Developmental Biology (Homo sapiens)	0.190844	0	2	0.00394796	4	0.00220414	44	2	152	0.00394796	0.0515109	0.190844	4	26	0.00220414	9606	Homo sapiens			P35222;Q14192	Q12778;O00482-1	R-HSA-210773;R-HSA-211178;R-HSA-211272;R-HSA-211164
	R-HSA-428542	Regulation of commissural axon pathfinding by SLIT and ROBO	Developmental Biology (Homo sapiens)	0.190844	0	1	0.000897263	1	0.000423872	10	1	57	0.000897263	0.11816	0.190844	1	5	0.000423872	9606	Homo sapiens			P35222	P12931	R-HSA-9011241
	R-HSA-1234158	Regulation of gene expression by Hypoxia-inducible Factor	Cellular responses to external stimuli (Homo sapiens)	0.190844	0	1	0.00098699	1	0.000593421	11	1	90	0.00098699	0.167286	0.190844	1	7	0.000593421	9606	Homo sapiens			P35222	Q92793	R-HSA-1234167
	R-HSA-210747	Regulation of gene expression in early pancreatic precursor cells	Developmental Biology (Homo sapiens)	0.190844	0	1	0.000717811	1	0.000508647	8	1	24	0.000717811	0.0590876	0.190844	1	6	0.000508647	9606	Homo sapiens			P35222	O00482-1	R-HSA-210773
	R-HSA-9614399	Regulation of localization of FOXO transcription factors	Gene expression (Transcription) (Homo sapiens)	0.190844	0	1	0.00107672	1	0.000423872	12	1	33	0.00107672	0.0733225	0.190844	1	5	0.000423872	9606	Homo sapiens			Q14192	Q12778	R-HSA-9614423
	R-HSA-9627069	Regulation of the apoptosome activity	Programmed Cell Death (Homo sapiens)	0.190844	0	1	0.00098699	1	0.000508647	11	1	89	0.00098699	0.164095	0.190844	1	6	0.000508647	9606	Homo sapiens			Q14192	Q9Y2G2	R-HSA-6805426
	R-HSA-76005	Response to elevated platelet cytosolic Ca2+	Hemostasis (Homo sapiens)	0.190844	2	0	0.0119336	1	0.00118684	133	0	82	0.0119336	0.0623769	0.190844	1	14	0.00118684	9606	Homo sapiens	P01137;P02751	P01137;P02751			R-HSA-481007
	R-HSA-195258	RHO GTPase Effectors	Signal Transduction (Homo sapiens)	0.190844	1	3	0.0264693	3	0.00949474	295	3	540	0.0264693	0.190528	0.190844	3	112	0.00949474	9606	Homo sapiens	P35222	P35222	P02751;P35222;Q14192	P05556;P00519	R-HSA-2130194;R-HSA-5672304;R-HSA-5666049
	R-HSA-5626467	RHO GTPases activate IQGAPs	Signal Transduction (Homo sapiens)	0.190844	1	0	0.00287124	1	0.000423872	32	0	10	0.00287124	0.0750872	0.190844	1	5	0.000423872	9606	Homo sapiens	P35222	P35222			R-HSA-5672304
	R-HSA-5663213	RHO GTPases Activate WASPs and WAVEs	Signal Transduction (Homo sapiens)	0.190844	0	1	0.00323015	1	0.000847745	36	1	52	0.00323015	0.141425	0.190844	1	10	0.000847745	9606	Homo sapiens			P35222	P00519	R-HSA-2130194
	R-HSA-74158	RNA Polymerase III Transcription	Gene expression (Transcription) (Homo sapiens)	0.190844	0	1	0.00367878	1	0.00211936	41	1	28	0.00367878	0.123196	0.190844	1	25	0.00211936	9606	Homo sapiens			Q14192	P52747	R-HSA-83791
	R-HSA-76046	RNA Polymerase III Transcription Initiation	Gene expression (Transcription) (Homo sapiens)	0.190844	0	1	0.00323015	1	0.00110207	36	1	23	0.00323015	0.106299	0.190844	1	13	0.00110207	9606	Homo sapiens			Q14192	P52747	R-HSA-83791
	R-HSA-76071	RNA Polymerase III Transcription Initiation From Type 3 Promoter	RNA Polymerase III Transcription Initiation	0.190844	0	1	0.00251234	1	0.000339098	28	1	23	0.00251234	0.0925553	0.190844	1	4	0.000339098	9606	Homo sapiens			Q14192	P52747	R-HSA-83791
	R-HSA-8931987	RUNX1 regulates estrogen receptor mediated transcription	Gene expression (Transcription) (Homo sapiens)	0.190844	0	1	0.000538358	1	0.000678196	6	1	93	0.000538358	0.168877	0.190844	1	8	0.000678196	9606	Homo sapiens			P35222	O15169	R-HSA-8932076
	R-HSA-8939246	RUNX1 regulates transcription of genes involved in differentiation of myeloid cells	Gene expression (Transcription) (Homo sapiens)	0.190844	0	1	0.000717811	1	0.000593421	8	1	55	0.000717811	0.113096	0.190844	1	7	0.000593421	9606	Homo sapiens			P35222	Q92793	R-HSA-8938231
	R-HSA-8939256	RUNX1 regulates transcription of genes involved in WNT signaling	Gene expression (Transcription) (Homo sapiens)	0.190844	0	1	0.000538358	1	0.000339098	6	1	63	0.000538358	0.12152	0.190844	1	4	0.000339098	9606	Homo sapiens			P35222	O15169	R-HSA-8932076
	R-HSA-8951936	RUNX3 regulates p14-ARF	Gene expression (Transcription) (Homo sapiens)	0.190844	1	0	0.000807537	1	0.000678196	9	0	96	0.000807537	0.178361	0.190844	1	8	0.000678196	9606	Homo sapiens	P01137	P01137			R-HSA-8951966
	R-HSA-5693548	Sensing of DNA Double Strand Breaks	DNA Repair (Homo sapiens)	0.190844	0	1	0.000538358	2	0.000678196	6	1	89	0.000538358	0.159286	0.190844	2	8	0.000678196	9606	Homo sapiens			P02751	P52292	R-HSA-5684006;R-HSA-5684008
	R-HSA-162582	Signal Transduction	Signal Transduction (Homo sapiens)	0.190844	13	7	0.247465	184	0.186504	2758	7	4972	0.247465	0.189438	0.190844	184	2200	0.186504	9606	Homo sapiens	P02461;P12109;P20908;P35222;P12111;P12110;P20849;P10071;P08123;P48436;P01137;O94907;P02751	P02461;P12109;P20908;P35222;P12111;P12110;P20849;P10071;P08123;P48436;P01137;O94907;P02751	P01137;P02751;P35222;P10071;P35453;P02751;Q14192	P05556;Q9NSA3;P07237;P05412;Q12778;P05814;Q5JTC6;Q9GZV5;Q9NYA1;Q9Y297;P06241;Q9Y2T1;P49757;O14746;P18146;Q6P1J9;Q12913;P49023;P25054;O95995;P25490;Q9Y265;P52292;O15169;Q9NYF0;Q14160;Q92793;P49841;Q9UMX1;P37173;P46937;P12931;P00519	R-HSA-3769401;R-HSA-178178;R-HSA-2160931;R-HSA-3322422;R-HSA-2160932;R-HSA-2160935;R-HSA-3769393;R-HSA-3769392;R-HSA-3322427;R-HSA-3322424;R-HSA-3769394;R-HSA-5692761;R-HSA-178189;R-HSA-9021596;R-HSA-3769391;R-HSA-354066;R-HSA-4608862;R-HSA-354073;R-HSA-5665608;R-HSA-3769383;R-HSA-9009065;R-HSA-354087;R-HSA-2134532;R-HSA-3451153;R-HSA-9619127;R-HSA-5672304;R-HSA-5692785;R-HSA-8944047;R-HSA-202859…
	R-HSA-6802952	Signaling by BRAF and RAF fusions	Disease (Homo sapiens)	0.190844	1	0	0.00583221	4	0.000423872	65	0	0	0.00583221	0.116475	0.190844	4	5	0.000423872	9606	Homo sapiens	P02751	P02751			R-HSA-6802935;R-HSA-6802934;R-HSA-6802933;R-HSA-6802932
	R-HSA-1236394	Signaling by ERBB4	Signal Transduction (Homo sapiens)	0.190844	0	2	0.00430686	2	0.00313666	48	2	200	0.00430686	0.0766738	0.190844	2	37	0.00313666	9606	Homo sapiens			P35222;Q14192	P05814;P46937	R-HSA-1254290;R-HSA-1254251
	R-HSA-6802948	Signaling by high-kinase activity BRAF mutants	Disease (Homo sapiens)	0.190844	1	0	0.00323015	4	0.000508647	36	0	0	0.00323015	0.0662314	0.190844	4	6	0.000508647	9606	Homo sapiens	P02751	P02751			R-HSA-6802912;R-HSA-6802911;R-HSA-6802910;R-HSA-6803227
	R-HSA-449147	Signaling by Interleukins	Immune System (Homo sapiens)	0.190844	3	4	0.0410947	10	0.0417091	458	4	1739	0.0410947	0.175172	0.190844	10	492	0.0417091	9606	Homo sapiens	P08123;P01137;P02751	P08123;P01137;P02751	P01137;P35222;P35453;Q16853	P07237;P05412;P19838;Q16623	R-HSA-6785895;R-HSA-8950456;R-HSA-450292;R-HSA-451634;R-HSA-6789615;R-HSA-8950113;R-HSA-168440;R-HSA-168136;R-HSA-449117;R-HSA-8950183
	R-HSA-6802946	Signaling by moderate kinase activity BRAF mutants	Disease (Homo sapiens)	0.190844	1	0	0.00403769	4	0.000593421	45	0	14	0.00403769	0.106299	0.190844	4	7	0.000593421	9606	Homo sapiens	P02751	P02751			R-HSA-6802919;R-HSA-6802914;R-HSA-6803230;R-HSA-6802921
	R-HSA-6802949	Signaling by RAS mutants	Disease (Homo sapiens)	0.190844	1	0	0.00520413	4	0.000678196	58	0	14	0.00520413	0.128204	0.190844	4	8	0.000678196	9606	Homo sapiens	P02751	P02751			R-HSA-6803233;R-HSA-6802926;R-HSA-6802925;R-HSA-6802922
	R-HSA-3304351	Signaling by TGF-beta Receptor Complex in Cancer	Disease (Homo sapiens)	0.190844	1	0	0.000717811	5	0.000593421	8	0	32	0.000717811	0.0680091	0.190844	5	7	0.000593421	9606	Homo sapiens	P01137	P01137			R-HSA-3645780;R-HSA-3304394;R-HSA-3656382;R-HSA-3656523;R-HSA-3642203
	R-HSA-171319	Telomere Extension By Telomerase	Cell Cycle (Homo sapiens)	0.190844	0	1	0.000538358	1	0.000593421	6	1	65	0.000538358	0.11816	0.190844	1	7	0.000593421	9606	Homo sapiens			P35222	O14746;Q9Y265	R-HSA-164616
	R-HSA-2173791	TGF-beta receptor signaling in EMT (epithelial to mesenchymal transition)	Signal Transduction (Homo sapiens)	0.190844	1	0	0.00143562	5	0.000508647	16	0	11	0.00143562	0.0482727	0.190844	5	6	0.000508647	9606	Homo sapiens	P01137	P01137			R-HSA-2160931;R-HSA-2160932;R-HSA-2134532;R-HSA-2160935;R-HSA-2134519
	R-HSA-168142	Toll Like Receptor 10 (TLR10) Cascade	Immune System (Homo sapiens)	0.190844	0	2	0.00762674	4	0.0050017	85	2	352	0.00762674	0.174704	0.190844	4	59	0.0050017	9606	Homo sapiens			P35222;P35453	P05412;P19838	R-HSA-450292;R-HSA-451634;R-HSA-168440;R-HSA-168136
	R-HSA-168176	Toll Like Receptor 5 (TLR5) Cascade	Immune System (Homo sapiens)	0.190844	0	2	0.00762674	4	0.0050017	85	2	351	0.00762674	0.174704	0.190844	4	59	0.0050017	9606	Homo sapiens			P35222;P35453	P05412;P19838	R-HSA-450292;R-HSA-451634;R-HSA-168440;R-HSA-168136
	R-HSA-168181	Toll Like Receptor 7/8 (TLR7/8) Cascade	Immune System (Homo sapiens)	0.190844	0	2	0.0081651	4	0.00542557	91	2	359	0.0081651	0.183581	0.190844	4	64	0.00542557	9606	Homo sapiens			P35222;P35453	P05412;P19838	R-HSA-450292;R-HSA-451634;R-HSA-168440;R-HSA-168136
	R-HSA-168138	Toll Like Receptor 9 (TLR9) Cascade	Immune System (Homo sapiens)	0.190844	0	2	0.008524	4	0.00567989	95	2	362	0.008524	0.18839	0.190844	4	67	0.00567989	9606	Homo sapiens			P35222;P35453	P05412;P19838	R-HSA-450292;R-HSA-451634;R-HSA-168440;R-HSA-168136
	R-HSA-6803205	TP53 regulates transcription of several additional cell death genes whose specific roles in p53-dependent apoptosis remain uncertain	Gene expression (Transcription) (Homo sapiens)	0.190844	0	1	0.00125617	1	0.00152594	14	1	89	0.00125617	0.17205	0.190844	1	18	0.00152594	9606	Homo sapiens			P35222	Q92597	R-HSA-5633314
	R-HSA-975138	TRAF6 mediated induction of NFkB and MAP kinases upon TLR7/8 or 9 activation	Immune System (Homo sapiens)	0.190844	0	2	0.00807537	4	0.00406918	90	2	326	0.00807537	0.16456	0.190844	4	48	0.00406918	9606	Homo sapiens			P35222;P35453	P05412;P19838	R-HSA-450292;R-HSA-451634;R-HSA-168440;R-HSA-168136
	R-HSA-1362277	Transcription of E2F targets under negative control by DREAM complex	Cell Cycle (Homo sapiens)	0.190844	0	1	0.0017048	1	0.00101729	19	1	94	0.0017048	0.189294	0.190844	1	12	0.00101729	9606	Homo sapiens			P35222	P11388	R-HSA-8964531
	R-HSA-8878159	Transcriptional regulation by RUNX3	Gene expression (Transcription) (Homo sapiens)	0.190844	2	2	0.00861373	22	0.0039844	96	2	369	0.00861373	0.0502015	0.190844	22	47	0.0039844	9606	Homo sapiens	P01137;P35222	P01137;P35222	P02751;P35222	Q13761;P12931;P29279	R-HSA-8878117;R-HSA-4411367;R-HSA-8952399;R-HSA-8937807;R-HSA-8952128;R-HSA-8937792;R-HSA-8865454;R-HSA-8878220;R-HSA-8952419;R-HSA-8951428;R-HSA-8952408;R-HSA-8951676;R-HSA-8878193;R-HSA-8952382;R-HSA-8951966;R-HSA-8878143;R-HSA-1989766;R-HSA-8951442;R-HSA-8951443;R-HSA-8952371;R-HSA-4411357;R-HSA-8937814
	R-HSA-110312	Translesion synthesis by REV1	DNA Repair (Homo sapiens)	0.190844	0	1	0.00143562	1	0.000423872	16	1	45	0.00143562	0.104592	0.190844	1	5	0.000423872	9606	Homo sapiens			Q14192	Q9UBZ9	R-HSA-110307
	R-HSA-75815	Ubiquitin-dependent degradation of Cyclin D	Cell Cycle (Homo sapiens)	0.190844	0	1	0.00466577	1	0.000423872	52	1	59	0.00466577	0.189294	0.190844	1	5	0.000423872	9606	Homo sapiens			P35222	P49841	R-HSA-75820
	R-HSA-5218921	VEGFR2 mediated cell proliferation	Signal Transduction (Homo sapiens)	0.190844	0	1	0.0017048	2	0.00101729	19	1	52	0.0017048	0.126538	0.190844	2	12	0.00101729	9606	Homo sapiens			Q14192	Q9NYA1	R-HSA-5218845;R-HSA-5218823
	R-HSA-9615017	FOXO-mediated transcription of oxidative stress, metabolic and neuronal genes	Gene expression (Transcription) (Homo sapiens)	0.193936	0	1	0.00269179	9	0.00288233	30	1	88	0.00269179	0.193936	0.193936	9	34	0.00288233	9606	Homo sapiens			Q14192	Q12778	R-HSA-9623059;R-HSA-9625699;R-HSA-9622980;R-HSA-9625828;R-HSA-9623018;R-HSA-9623240;R-HSA-9617833;R-HSA-9625324;R-HSA-9625101
	R-HSA-3214841	PKMTs methylate histone lysines	Chromatin organization (Homo sapiens)	0.193936	0	1	0.00421714	3	0.00186504	47	1	72	0.00421714	0.193936	0.193936	3	22	0.00186504	9606	Homo sapiens			P35222	Q8TEK3	R-HSA-5649799;R-HSA-5649764;R-HSA-5649801
	R-HSA-166058	MyD88:MAL(TIRAP) cascade initiated on plasma membrane	Immune System (Homo sapiens)	0.196679	0	2	0.00861373	4	0.00542557	96	2	377	0.00861373	0.196679	0.196679	4	64	0.00542557	9606	Homo sapiens			P35222;P35453	P05412;P19838	R-HSA-450292;R-HSA-451634;R-HSA-168440;R-HSA-168136
	R-HSA-114604	GPVI-mediated activation cascade	Hemostasis (Homo sapiens)	0.197016	1	0	0.00314042	5	0.00211936	35	0	86	0.00314042	0.197016	0.197016	5	25	0.00211936	9606	Homo sapiens	P08123	P08123			R-HSA-139842;R-HSA-453200;R-HSA-437118;R-HSA-453183;R-HSA-114600
	R-HSA-168164	Toll Like Receptor 3 (TLR3) Cascade	Immune System (Homo sapiens)	0.198759	0	2	0.00834455	4	0.00517124	93	2	387	0.00834455	0.198759	0.198759	4	61	0.00517124	9606	Homo sapiens			P35222;P35453	P05412;P19838	R-HSA-450292;R-HSA-451634;R-HSA-168440;R-HSA-168136
	R-HSA-168179	Toll Like Receptor TLR1:TLR2 Cascade	Immune System (Homo sapiens)	0.199453	0	2	0.00888291	4	0.00559512	99	2	378	0.00888291	0.199453	0.199453	4	66	0.00559512	9606	Homo sapiens			P35222;P35453	P05412;P19838	R-HSA-450292;R-HSA-451634;R-HSA-168440;R-HSA-168136
	R-HSA-168188	Toll Like Receptor TLR6:TLR2 Cascade	Immune System (Homo sapiens)	0.199453	0	2	0.00861373	4	0.00559512	96	2	381	0.00861373	0.199453	0.199453	4	66	0.00559512	9606	Homo sapiens			P35222;P35453	P05412;P19838	R-HSA-450292;R-HSA-451634;R-HSA-168440;R-HSA-168136
	R-HSA-110313	Translesion synthesis by Y family DNA polymerases bypasses lesions on DNA template	DNA Repair (Homo sapiens)	0.200085	0	1	0.00349933	5	0.00237369	39	1	86	0.00349933	0.200085	0.200085	5	28	0.00237369	9606	Homo sapiens			Q14192	Q9UBZ9	R-HSA-110307;R-HSA-5656158;R-HSA-5655965;R-HSA-5655835;R-HSA-5656105
	R-HSA-181438	Toll Like Receptor 2 (TLR2) Cascade	Immune System (Homo sapiens)	0.201537	0	2	0.00888291	4	0.00576467	99	2	381	0.00888291	0.201537	0.201537	4	68	0.00576467	9606	Homo sapiens			P35222;P35453	P05412;P19838	R-HSA-450292;R-HSA-451634;R-HSA-168440;R-HSA-168136
	R-HSA-5467337	APC truncation mutants have impaired AXIN binding	Disease (Homo sapiens)	0.204667	0	1	0.00125617	1	8.47745e-05	14	1	112	0.00125617	0.204667	0.204667	1	1	8.47745e-05	9606	Homo sapiens			P35222	Q5JTC6;O15169;P49841	R-HSA-4791278
	R-HSA-4839744	truncated APC mutants destabilize the destruction complex	Disease (Homo sapiens)	0.204667	0	1	0.00125617	1	0.000169549	14	1	112	0.00125617	0.204667	0.204667	1	2	0.000169549	9606	Homo sapiens			P35222	Q5JTC6;O15169;P49841	R-HSA-4791278
	R-HSA-8862803	Deregulated CDK5 triggers multiple neurodegenerative pathways in Alzheimer's disease models	Disease (Homo sapiens)	0.206699	0	3	0.00197398	4	0.00186504	22	3	817	0.00197398	0.206699	0.206699	4	22	0.00186504	9606	Homo sapiens			P01137;P35453;Q05707	P32119;P05412;P05067	R-HSA-8870710;R-HSA-8863009;R-HSA-8868573;R-HSA-8868666
	R-HSA-8863678	Neurodegenerative Diseases	Disease (Homo sapiens)	0.206699	0	3	0.00197398	4	0.00186504	22	3	817	0.00197398	0.206699	0.206699	4	22	0.00186504	9606	Homo sapiens			P01137;P35453;Q05707	P32119;P05412;P05067	R-HSA-8870710;R-HSA-8863009;R-HSA-8868573;R-HSA-8868666
	R-HSA-111471	Apoptotic factor-mediated response	Programmed Cell Death (Homo sapiens)	0.207708	0	1	0.00143562	2	0.00220414	16	1	114	0.00143562	0.207708	0.207708	2	26	0.00220414	9606	Homo sapiens			Q14192	Q9Y2G2	R-HSA-114256;R-HSA-6805426
	R-HSA-525793	Myogenesis	Developmental Biology (Homo sapiens)	0.209224	1	1	0.00260206	8	0.00118684	29	1	97	0.00260206	0.209224	0.209224	8	14	0.00118684	9606	Homo sapiens	P35222	P35222	P35222	P00519	R-HSA-376117;R-HSA-448951;R-HSA-375140;R-HSA-376119;R-HSA-449200;R-HSA-448958;R-HSA-448957;R-HSA-376121
	R-HSA-8866376	Reelin signalling pathway	Developmental Biology (Homo sapiens)	0.210738	0	1	0.000448632	1	0.000339098	5	1	120	0.000448632	0.210738	0.210738	1	4	0.000339098	9606	Homo sapiens			P02751	P06241	R-HSA-8855237
	R-HSA-381340	Transcriptional regulation of white adipocyte differentiation	Developmental Biology (Homo sapiens)	0.212698	1	2	0.00753701	3	0.00152594	84	2	394	0.00753701	0.212698	0.212698	3	18	0.00152594	9606	Homo sapiens	P01137	P01137	P01137;P35222	P01137;Q92793	R-HSA-560491;R-HSA-381283;R-HSA-381309
	R-HSA-351906	Apoptotic cleavage of cell adhesion proteins	Programmed Cell Death (Homo sapiens)	0.215261	1	1	0.00098699	2	0.000847745	11	1	118	0.00098699	0.215261	0.215261	2	10	0.000847745	9606	Homo sapiens	P35222	P35222	P35222	P12830	R-HSA-202939;R-HSA-202969
	R-HSA-4655427	SUMOylation of DNA methylation proteins	Metabolism of proteins (Homo sapiens)	0.216763	0	1	0.00143562	1	0.000254323	16	1	117	0.00143562	0.216763	0.216763	1	3	0.000254323	9606	Homo sapiens			P35222	P26358	R-HSA-4655431
	R-HSA-381771	Synthesis, secretion, and inactivation of Glucagon-like Peptide-1 (GLP-1)	Metabolism of proteins (Homo sapiens)	0.216763	1	0	0.00179453	1	0.000593421	20	0	110	0.00179453	0.216763	0.216763	1	7	0.000593421	9606	Homo sapiens	P35222	P35222			R-HSA-381799
	R-HSA-4839748	AMER1 mutants destabilize the destruction complex	Disease (Homo sapiens)	0.218262	0	1	0.00125617	1	8.47745e-05	14	1	121	0.00125617	0.218262	0.218262	1	1	8.47745e-05	9606	Homo sapiens			P35222	P25054;O15169;P49841	R-HSA-4839746
	R-HSA-5467348	Truncations of AMER1 destabilize the destruction complex	Disease (Homo sapiens)	0.218262	0	1	0.00125617	1	8.47745e-05	14	1	121	0.00125617	0.218262	0.218262	1	1	8.47745e-05	9606	Homo sapiens			P35222	P25054;O15169;P49841	R-HSA-4839746
	R-HSA-73893	DNA Damage Bypass	DNA Repair (Homo sapiens)	0.219759	0	1	0.00439659	5	0.00288233	49	1	89	0.00439659	0.219759	0.219759	5	34	0.00288233	9606	Homo sapiens			Q14192	Q9UBZ9	R-HSA-110307;R-HSA-5656158;R-HSA-5655965;R-HSA-5655835;R-HSA-5656105
	R-HSA-166166	MyD88-independent TLR4 cascade	Immune System (Homo sapiens)	0.222519	0	2	0.00870345	4	0.00508647	97	2	416	0.00870345	0.222519	0.222519	4	60	0.00508647	9606	Homo sapiens			P35222;P35453	P05412;P19838	R-HSA-450292;R-HSA-451634;R-HSA-168440;R-HSA-168136
	R-HSA-937061	TRIF(TICAM1)-mediated TLR4 signaling	Immune System (Homo sapiens)	0.222519	0	2	0.00870345	4	0.00491692	97	2	416	0.00870345	0.222519	0.222519	4	58	0.00491692	9606	Homo sapiens			P35222;P35453	P05412;P19838	R-HSA-450292;R-HSA-451634;R-HSA-168440;R-HSA-168136
	R-HSA-9020933	Interleukin-23 signaling	Immune System (Homo sapiens)	0.225717	0	1	0.000807537	1	0.00101729	9	1	130	0.000807537	0.225717	0.225717	1	12	0.00101729	9606	Homo sapiens			P01137	P07237	R-HSA-8950183
	R-HSA-8934593	Regulation of RUNX1 Expression and Activity	Gene expression (Transcription) (Homo sapiens)	0.230157	0	1	0.00152535	2	0.00161072	17	1	125	0.00152535	0.230157	0.230157	2	19	0.00161072	9606	Homo sapiens			P35222	P12931	R-HSA-8937728;R-HSA-8937682
	R-HSA-5624958	ARL13B-mediated ciliary trafficking of INPP5E	Organelle biogenesis and maintenance (Homo sapiens)	0.231632	0	1	0.000269179	1	0.000339098	3	1	137	0.000269179	0.231632	0.231632	1	4	0.000339098	9606	Homo sapiens			Q16853	Q3SXY8	R-HSA-5624953
	R-HSA-9018519	Estrogen-dependent gene expression	Signal Transduction (Homo sapiens)	0.232317	0	3	0.0107672	4	0.00542557	120	3	790	0.0107672	0.232317	0.232317	4	64	0.00542557	9606	Homo sapiens			P02751;P35222;Q14192	P25490;P52292;O15169;Q92793	R-HSA-9009065;R-HSA-8932076;R-HSA-9038052;R-HSA-9012196
	R-HSA-430116	GP1b-IX-V activation signalling	Hemostasis (Homo sapiens)	0.233103	1	0	0.00107672	5	0.000593421	12	0	129	0.00107672	0.233103	0.233103	5	7	0.000593421	9606	Homo sapiens	P08123	P08123			R-HSA-430096;R-HSA-430076;R-HSA-443418;R-HSA-443402;R-HSA-430073
	R-HSA-390466	Chaperonin-mediated protein folding	Metabolism of proteins (Homo sapiens)	0.236039	0	1	0.00861373	1	0.00161072	96	1	47	0.00861373	0.236039	0.236039	1	19	0.00161072	9606	Homo sapiens			Q14192	Q9NYA1	R-HSA-391266
	R-HSA-400508	Incretin synthesis, secretion, and inactivation	Metabolism of proteins (Homo sapiens)	0.236039	1	0	0.00206371	1	0.00118684	23	0	120	0.00206371	0.236039	0.236039	1	14	0.00118684	9606	Homo sapiens	P35222	P35222			R-HSA-381799
	R-HSA-211945	Phase I - Functionalization of compounds	Metabolism (Homo sapiens)	0.236039	1	0	0.00942127	1	0.00822313	105	0	36	0.00942127	0.236039	0.236039	1	97	0.00822313	9606	Homo sapiens	Q16853	Q16853			R-HSA-5696183
	R-HSA-5621575	CD209 (DC-SIGN) signaling	Immune System (Homo sapiens)	0.237502	0	1	0.00188425	1	0.000932519	21	1	132	0.00188425	0.237502	0.237502	1	11	0.000932519	9606	Homo sapiens			P35222	Q04206	R-HSA-5660980
	R-HSA-210745	Regulation of gene expression in beta cells	Developmental Biology (Homo sapiens)	0.238963	0	1	0.00206371	3	0.00101729	23	1	123	0.00206371	0.238963	0.238963	3	12	0.00101729	9606	Homo sapiens			Q14192	Q12778	R-HSA-211178;R-HSA-211272;R-HSA-211164
	R-HSA-8951430	RUNX3 regulates WNT signaling	Gene expression (Transcription) (Homo sapiens)	0.238963	1	1	0.000717811	5	0.000423872	8	1	139	0.000717811	0.238963	0.238963	5	5	0.000423872	9606	Homo sapiens	P35222	P35222	P35222	Q13761	R-HSA-4411367;R-HSA-8951442;R-HSA-8951443;R-HSA-8951428;R-HSA-4411357
	R-HSA-389356	CD28 co-stimulation	Immune System (Homo sapiens)	0.240421	0	1	0.00296097	1	0.00161072	33	1	115	0.00296097	0.240421	0.240421	1	19	0.00161072	9606	Homo sapiens			P02751	P06241	R-HSA-389354
	R-HSA-4641258	Degradation of DVL	Signal Transduction (Homo sapiens)	0.240421	0	1	0.0051144	1	0.000593421	57	1	93	0.0051144	0.240421	0.240421	1	7	0.000593421	9606	Homo sapiens			P35222	Q9NYF0	R-HSA-4641147
	R-HSA-9034015	Signaling by NTRK3 (TRKC)	Signal Transduction (Homo sapiens)	0.240421	0	1	0.00161507	1	0.00161072	18	1	130	0.00161507	0.240421	0.240421	1	19	0.00161072	9606	Homo sapiens			P35222	P12931	R-HSA-9603419
	R-HSA-6803204	TP53 Regulates Transcription of Genes Involved in Cytochrome C Release	Gene expression (Transcription) (Homo sapiens)	0.240421	0	1	0.00179453	1	0.00211936	20	1	128	0.00179453	0.240421	0.240421	1	25	0.00211936	9606	Homo sapiens			P35222	Q92793	R-HSA-6797993
	R-HSA-2173788	Downregulation of TGF-beta receptor signaling	Signal Transduction (Homo sapiens)	0.241877	1	0	0.00233288	11	0.00237369	26	0	125	0.00233288	0.241877	0.241877	11	28	0.00237369	9606	Homo sapiens	P01137	P01137			R-HSA-178178;R-HSA-2128994;R-HSA-2169046;R-HSA-178218;R-HSA-173483;R-HSA-173512;R-HSA-2127562;R-HSA-2179291;R-HSA-2169050;R-HSA-2179293;R-HSA-178189
	R-HSA-5218920	VEGFR2 mediated vascular permeability	Signal Transduction (Homo sapiens)	0.241877	1	0	0.00242261	1	0.00127162	27	0	126	0.00242261	0.241877	0.241877	1	15	0.00127162	9606	Homo sapiens	P35222	P35222			R-HSA-5357477
	R-HSA-4090294	SUMOylation of intracellular receptors	Metabolism of proteins (Homo sapiens)	0.24724	0	2	0.00278152	1	0.00211936	31	2	483	0.00278152	0.24724	0.24724	1	25	0.00211936	9606	Homo sapiens			P35222;Q14192	P10275	R-HSA-4090390
	R-HSA-203615	eNOS activation	Metabolism (Homo sapiens)	0.247671	0	1	0.00098699	3	0.00161072	11	1	141	0.00098699	0.247671	0.247671	3	19	0.00161072	9606	Homo sapiens			P35222	P29474	R-HSA-203700;R-HSA-203611;R-HSA-203567
	R-HSA-111996	Ca-dependent events	Signal Transduction (Homo sapiens)	0.249113	0	1	0.00323015	2	0.00220414	36	1	116	0.00323015	0.249113	0.249113	2	26	0.00220414	9606	Homo sapiens			P02751	P52292	R-HSA-9619127;R-HSA-112282
	R-HSA-1489509	DAG and IP3 signaling	Signal Transduction (Homo sapiens)	0.249113	0	1	0.00358905	2	0.00228891	40	1	111	0.00358905	0.249113	0.249113	2	27	0.00228891	9606	Homo sapiens			P02751	P52292	R-HSA-9619127;R-HSA-112282
	R-HSA-450513	Tristetraprolin (TTP, ZFP36) binds and destabilizes mRNA	Metabolism of RNA (Homo sapiens)	0.249113	0	1	0.00152535	1	0.000339098	17	1	137	0.00152535	0.249113	0.249113	1	4	0.000339098	9606	Homo sapiens			Q14192	Q9NPI6	R-HSA-450431
	R-HSA-264642	Acetylcholine Neurotransmitter Release Cycle	Neuronal System (Homo sapiens)	0.250553	0	1	0.00152535	1	0.000423872	17	1	136	0.00152535	0.250553	0.250553	1	5	0.000423872	9606	Homo sapiens			Q16853	Q16623	R-HSA-372505
	R-HSA-5635838	Activation of SMO	Signal Transduction (Homo sapiens)	0.250553	0	1	0.00161507	1	0.00076297	18	1	134	0.00161507	0.250553	0.250553	1	9	0.00076297	9606	Homo sapiens			Q14192	O95995	R-HSA-5632668
	R-HSA-194315	Signaling by Rho GTPases	Signal Transduction (Homo sapiens)	0.253361	1	3	0.0382234	3	0.00991862	426	3	540	0.0382234	0.253361	0.253361	3	117	0.00991862	9606	Homo sapiens	P35222	P35222	P02751;P35222;Q14192	P05556;P00519	R-HSA-2130194;R-HSA-5672304;R-HSA-5666049
	R-HSA-350054	Notch-HLH transcription pathway	Gene expression (Transcription) (Homo sapiens)	0.253423	0	1	0.00251234	1	0.000169549	28	1	132	0.00251234	0.253423	0.253423	1	2	0.000169549	9606	Homo sapiens			P35222	Q92793	R-HSA-212356
	R-HSA-156711	Polo-like kinase mediated events	Cell Cycle (Homo sapiens)	0.256283	0	1	0.00143562	7	0.00127162	16	1	145	0.00143562	0.256283	0.256283	7	15	0.00127162	9606	Homo sapiens			P35222	Q08050	R-HSA-4088134;R-HSA-4088439;R-HSA-4088309;R-HSA-4088162;R-HSA-4088130;R-HSA-4088306;R-HSA-4088307
	R-HSA-391251	Protein folding	Metabolism of proteins (Homo sapiens)	0.259133	0	1	0.00915209	1	0.00237369	102	1	57	0.00915209	0.259133	0.259133	1	28	0.00237369	9606	Homo sapiens			Q14192	Q9NYA1	R-HSA-391266
	R-HSA-181430	Norepinephrine Neurotransmitter Release Cycle	Neuronal System (Homo sapiens)	0.260553	0	1	0.00161507	1	0.000423872	18	1	142	0.00161507	0.260553	0.260553	1	5	0.000423872	9606	Homo sapiens			Q16853	Q16623	R-HSA-374922
	R-HSA-181429	Serotonin Neurotransmitter Release Cycle	Neuronal System (Homo sapiens)	0.260553	0	1	0.00161507	1	0.000254323	18	1	142	0.00161507	0.260553	0.260553	1	3	0.000254323	9606	Homo sapiens			Q16853	Q16623	R-HSA-380905
	R-HSA-373755	Semaphorin interactions	Developmental Biology (Homo sapiens)	0.261971	0	1	0.00574249	2	0.00339098	64	1	107	0.00574249	0.261971	0.261971	2	40	0.00339098	9606	Homo sapiens			P35222	P49841;P08575	R-HSA-373746;R-HSA-399951
	R-HSA-210500	Glutamate Neurotransmitter Release Cycle	Neuronal System (Homo sapiens)	0.26621	0	1	0.00215343	1	0.000508647	24	1	140	0.00215343	0.26621	0.26621	1	6	0.000508647	9606	Homo sapiens			Q16853	Q16623	R-HSA-210426
	R-HSA-157579	Telomere Maintenance	Cell Cycle (Homo sapiens)	0.26621	0	1	0.00565276	1	0.00194981	63	1	109	0.00565276	0.26621	0.26621	1	23	0.00194981	9606	Homo sapiens			P35222	O14746;Q9Y265	R-HSA-164616
	R-HSA-450282	MAPK targets/ Nuclear events mediated by MAP kinases	Immune System (Homo sapiens)	0.267617	0	1	0.00278152	3	0.00135639	31	1	143	0.00278152	0.267617	0.267617	3	16	0.00135639	9606	Homo sapiens			P35453	P05412	R-HSA-450292;R-HSA-168440;R-HSA-168136
	R-HSA-5689603	UCH proteinases	Metabolism of proteins (Homo sapiens)	0.269022	1	0	0.00861373	1	0.000932519	96	0	117	0.00861373	0.269022	0.269022	1	11	0.000932519	9606	Homo sapiens	P01137	P01137			R-HSA-2179291
	R-HSA-9614085	FOXO-mediated transcription	Gene expression (Transcription) (Homo sapiens)	0.271385	0	2	0.00592194	14	0.00720583	66	2	491	0.00592194	0.271385	0.271385	14	85	0.00720583	9606	Homo sapiens			P35222;Q14192	Q12778;Q92793	R-HSA-9626962;R-HSA-9623059;R-HSA-9626928;R-HSA-9614423;R-HSA-9625699;R-HSA-9626945;R-HSA-9625510;R-HSA-9622980;R-HSA-9625828;R-HSA-9623018;R-HSA-9623240;R-HSA-9617833;R-HSA-9625324;R-HSA-9625101
	R-HSA-112043	PLC beta mediated events	Signal Transduction (Homo sapiens)	0.271824	0	1	0.00466577	2	0.00262801	52	1	116	0.00466577	0.271824	0.271824	2	31	0.00262801	9606	Homo sapiens			P02751	P52292	R-HSA-9619127;R-HSA-112282
	R-HSA-4411364	Binding of TCF/LEF:CTNNB1 to target gene promoters	Signal Transduction (Homo sapiens)	0.273221	1	1	0.000717811	4	0.000339098	8	1	160	0.000717811	0.273221	0.273221	4	4	0.000339098	9606	Homo sapiens	P35222	P35222	P35222	Q9Y2T1	R-HSA-4411351;R-HSA-4411367;R-HSA-4411357;R-HSA-4411372
	R-HSA-112040	G-protein mediated events	Signal Transduction (Homo sapiens)	0.273221	0	1	0.0047555	2	0.00339098	53	1	116	0.0047555	0.273221	0.273221	2	40	0.00339098	9606	Homo sapiens			P02751	P52292	R-HSA-9619127;R-HSA-112282
	R-HSA-4641262	Disassembly of the destruction complex and recruitment of AXIN to the membrane	Signal Transduction (Homo sapiens)	0.280168	1	1	0.00278152	3	0.000593421	31	1	150	0.00278152	0.280168	0.280168	3	7	0.000593421	9606	Homo sapiens	P35222	P35222	P35222	P25054;Q5JTC6;P49841	R-HSA-201685;R-HSA-3601585;R-HSA-5323526
	R-HSA-6807505	RNA polymerase II transcribes snRNA genes	Gene expression (Transcription) (Homo sapiens)	0.280168	0	1	0.00663975	1	0.000932519	74	1	107	0.00663975	0.280168	0.280168	1	11	0.000932519	9606	Homo sapiens			Q14192	P52747	R-HSA-6807496
	R-HSA-212676	Dopamine Neurotransmitter Release Cycle	Neuronal System (Homo sapiens)	0.281549	0	1	0.00206371	1	0.000339098	23	1	153	0.00206371	0.281549	0.281549	1	4	0.000339098	9606	Homo sapiens			Q16853	Q16623	R-HSA-380574
	R-HSA-418346	Platelet homeostasis	Hemostasis (Homo sapiens)	0.281549	0	1	0.00789592	4	0.00254323	88	1	89	0.00789592	0.281549	0.281549	4	30	0.00254323	9606	Homo sapiens			P35222	P16284	R-HSA-210294;R-HSA-210277;R-HSA-432143;R-HSA-435244
	R-HSA-8854050	FBXL7 down-regulates AURKA during mitotic entry and in early mitosis	Cell Cycle (Homo sapiens)	0.282929	0	1	0.00493495	1	0.000508647	55	1	122	0.00493495	0.282929	0.282929	1	6	0.000508647	9606	Homo sapiens			P35222	P63208	R-HSA-8854052
	R-HSA-421270	Cell-cell junction organization	Cell-Cell communication (Homo sapiens)	0.284305	1	1	0.00583221	1	0.00178026	65	1	120	0.00583221	0.284305	0.284305	1	21	0.00178026	9606	Homo sapiens	P35222	P35222	P35222	P35221	R-HSA-419002
	R-HSA-186763	Downstream signal transduction	Signal Transduction (Homo sapiens)	0.285679	0	1	0.00269179	1	0.00135639	30	1	158	0.00269179	0.285679	0.285679	1	16	0.00135639	9606	Homo sapiens			P35222	P12931	R-HSA-186819
	R-HSA-975957	Nonsense Mediated Decay (NMD) enhanced by the Exon Junction Complex (EJC)	Metabolism of RNA (Homo sapiens)	0.28705	0	1	0.010498	1	0.000423872	117	1	75	0.010498	0.28705	0.28705	1	5	0.000423872	9606	Homo sapiens			Q14192	Q9NPI6	R-HSA-927813
	R-HSA-927802	Nonsense-Mediated Decay (NMD)	Metabolism of RNA (Homo sapiens)	0.28705	0	1	0.010498	1	0.000508647	117	1	75	0.010498	0.28705	0.28705	1	6	0.000508647	9606	Homo sapiens			Q14192	Q9NPI6	R-HSA-927813
	R-HSA-3299685	Detoxification of Reactive Oxygen Species	Cellular responses to external stimuli (Homo sapiens)	0.293869	0	1	0.00349933	1	0.00271278	39	1	145	0.00349933	0.293869	0.293869	1	32	0.00271278	9606	Homo sapiens			P01137	P07237	R-HSA-3341296
	R-HSA-166016	Toll Like Receptor 4 (TLR4) Cascade	Immune System (Homo sapiens)	0.294131	0	2	0.0115747	4	0.00805358	129	2	498	0.0115747	0.294131	0.294131	4	95	0.00805358	9606	Homo sapiens			P35222;P35453	P05412;P19838	R-HSA-450292;R-HSA-451634;R-HSA-168440;R-HSA-168136
	R-HSA-9006927	Signaling by Non-Receptor Tyrosine Kinases	Signal Transduction (Homo sapiens)	0.294841	0	2	0.0051144	3	0.00449305	57	2	534	0.0051144	0.294841	0.294841	3	53	0.00449305	9606	Homo sapiens			P02751;P35222	P49023	R-HSA-8848596;R-HSA-8848611;R-HSA-8848606
	R-HSA-8848021	Signaling by PTK6	Signal Transduction (Homo sapiens)	0.294841	0	2	0.0051144	3	0.00449305	57	2	534	0.0051144	0.294841	0.294841	3	53	0.00449305	9606	Homo sapiens			P02751;P35222	P49023	R-HSA-8848596;R-HSA-8848611;R-HSA-8848606
	R-HSA-9617828	FOXO-mediated transcription of cell cycle genes	Gene expression (Transcription) (Homo sapiens)	0.29793	0	1	0.00152535	1	0.00186504	17	1	170	0.00152535	0.29793	0.29793	1	22	0.00186504	9606	Homo sapiens			Q14192	Q12778	R-HSA-9625510
	R-HSA-450385	Butyrate Response Factor 1 (BRF1) binds and destabilizes mRNA	Metabolism of RNA (Homo sapiens)	0.301968	0	1	0.00152535	1	0.000508647	17	1	175	0.00152535	0.301968	0.301968	1	6	0.000508647	9606	Homo sapiens			Q14192	Q9NPI6	R-HSA-450488
	R-HSA-73886	Chromosome Maintenance	Cell Cycle (Homo sapiens)	0.303309	0	1	0.00807537	1	0.00228891	90	1	109	0.00807537	0.303309	0.303309	1	27	0.00228891	9606	Homo sapiens			P35222	O14746;Q9Y265	R-HSA-164616
	R-HSA-1234174	Cellular response to hypoxia	Cellular responses to external stimuli (Homo sapiens)	0.307317	0	1	0.00672948	1	0.00169549	75	1	133	0.00672948	0.307317	0.307317	1	20	0.00169549	9606	Homo sapiens			P35222	Q92793	R-HSA-1234167
	R-HSA-427413	NoRC negatively regulates rRNA expression	Gene expression (Transcription) (Homo sapiens)	0.308648	0	1	0.00672948	1	0.000508647	75	1	129	0.00672948	0.308648	0.308648	1	6	0.000508647	9606	Homo sapiens			P35222	P26358	R-HSA-427409
	R-HSA-1912408	Pre-NOTCH Transcription and Translation	Signal Transduction (Homo sapiens)	0.308648	0	1	0.00556303	1	0.00228891	62	1	136	0.00556303	0.308648	0.308648	1	27	0.00228891	9606	Homo sapiens			P35453	P05412	R-HSA-1912401
	R-HSA-1430728	Metabolism	Metabolism (Homo sapiens)	0.309209	8	2	0.191297	36	0.167769	2132	2	1998	0.191297	0.309209	0.309209	36	1979	0.167769	9606	Homo sapiens	Q06828;P21810;Q16853;Q14192;P51888;P13611;P20774;P51884	Q06828;P21810;Q16853;Q14192;P51888;P13611;P20774;P51884	P35222;Q14192	Q14192;P29474	R-HSA-2046239;R-HSA-2046175;R-HSA-1971487;R-HSA-1793176;R-HSA-1971482;R-HSA-1971483;R-HSA-2046298;R-HSA-2065233;R-HSA-2046222;R-HSA-2046285;R-HSA-203611;R-HSA-1793217;R-HSA-2022911;R-HSA-1889981;R-HSA-5696183;R-HSA-2025724;R-HSA-9638064;R-HSA-2018682;R-HSA-2025723;R-HSA-1889978;R-HSA-2046265;R-HSA-203567;R-HSA-1989747;R-HSA-1878002;R-HSA-2022065;R-HSA-9632034;R-HSA-2022063;R-HSA-2022061;R-HSA-963…
	R-HSA-109582	Hemostasis	Hemostasis (Homo sapiens)	0.310454	3	2	0.0647824	44	0.0277213	722	2	1342	0.0647824	0.310454	0.310454	44	327	0.0277213	9606	Homo sapiens	P08123;P01137;P02751	P08123;P01137;P02751	P35222;P02751	P06241;P16284;P00519	R-HSA-139842;R-HSA-114563;R-HSA-210304;R-HSA-1013833;R-HSA-429441;R-HSA-432143;R-HSA-354124;R-HSA-8870732;R-HSA-443402;R-HSA-202702;R-HSA-114577;R-HSA-372693;R-HSA-430096;R-HSA-453200;R-HSA-354066;R-HSA-443418;R-HSA-372697;R-HSA-354073;R-HSA-429529;R-HSA-202723;R-HSA-354149;R-HSA-429415;R-HSA-432295;R-HSA-354087;R-HSA-372705;R-HSA-210277;R-HSA-210283;R-HSA-481007;R-HSA-114600;R-HSA-377644;R-HSA-4…
	R-HSA-9006925	Intracellular signaling by second messengers	Signal Transduction (Homo sapiens)	0.311116	0	3	0.0282638	4	0.00957952	315	3	768	0.0282638	0.311116	0.311116	4	113	0.00957952	9606	Homo sapiens			P02751;P35222;P35453	P05412;P52292;P18146	R-HSA-9619127;R-HSA-8944078;R-HSA-8944047;R-HSA-112282
	R-HSA-164944	Nef and signal transduction	Disease (Homo sapiens)	0.311303	0	1	0.000807537	1	0.000423872	9	1	193	0.000807537	0.311303	0.311303	1	5	0.000423872	9606	Homo sapiens			P02751	P06241	R-HSA-200908
	R-HSA-2028269	Signaling by Hippo	Signal Transduction (Homo sapiens)	0.316583	0	1	0.00179453	13	0.00254323	20	1	191	0.00179453	0.316583	0.316583	13	30	0.00254323	9606	Homo sapiens			P35222	Q9GZV5;P46937	R-HSA-2028735;R-HSA-2066299;R-HSA-2028598;R-HSA-2028724;R-HSA-2028661;R-HSA-2028651;R-HSA-2060328;R-HSA-2028583;R-HSA-2064421;R-HSA-2032770;R-HSA-2064418;R-HSA-2064417;R-HSA-2032768
	R-HSA-180534	Vpu mediated degradation of CD4	Disease (Homo sapiens)	0.319208	0	1	0.0047555	2	0.000423872	53	1	153	0.0047555	0.319208	0.319208	2	5	0.000423872	9606	Homo sapiens			P35222	Q9Y297;P63208	R-HSA-180599;R-HSA-180591
	R-HSA-3371453	Regulation of HSF1-mediated heat shock response	Cellular responses to external stimuli (Homo sapiens)	0.321823	0	1	0.00672948	1	0.00118684	75	1	136	0.00672948	0.321823	0.321823	1	14	0.00118684	9606	Homo sapiens			P35222	P49841	R-HSA-3371435
	R-HSA-6807070	PTEN Regulation	Signal Transduction (Homo sapiens)	0.328819	0	2	0.012472	2	0.00474737	139	2	497	0.012472	0.328819	0.328819	2	56	0.00474737	9606	Homo sapiens			P35222;P35453	P05412;P18146	R-HSA-8944078;R-HSA-8944047
	R-HSA-112315	Transmission across Chemical Synapses	Neuronal System (Homo sapiens)	0.3329	0	3	0.0244953	9	0.0129705	273	3	820	0.0244953	0.3329	0.3329	9	153	0.0129705	9606	Homo sapiens			P02751;P35222;Q16853	Q16623;P52292;P12931	R-HSA-9619127;R-HSA-9612085;R-HSA-210426;R-HSA-112282;R-HSA-380574;R-HSA-372505;R-HSA-380905;R-HSA-917744;R-HSA-374922
	R-HSA-202131	Metabolism of nitric oxide: eNOS activation and regulation	Metabolism (Homo sapiens)	0.334755	0	1	0.0013459	3	0.00211936	15	1	203	0.0013459	0.334755	0.334755	3	25	0.00211936	9606	Homo sapiens			P35222	P29474	R-HSA-203700;R-HSA-203611;R-HSA-203567
	R-HSA-354192	Integrin alphaIIb beta3 signaling	Hemostasis (Homo sapiens)	0.336035	1	0	0.00251234	15	0.00203459	28	0	195	0.00251234	0.336035	0.336035	15	24	0.00203459	9606	Homo sapiens	P02751	P02751			R-HSA-354149;R-HSA-429415;R-HSA-354087;R-HSA-372705;R-HSA-429441;R-HSA-377644;R-HSA-354124;R-HSA-377641;R-HSA-377640;R-HSA-377643;R-HSA-372693;R-HSA-354165;R-HSA-354066;R-HSA-372697;R-HSA-354073
	R-HSA-9006921	Integrin signaling	Signal Transduction (Homo sapiens)	0.336035	1	0	0.00251234	15	0.00203459	28	0	195	0.00251234	0.336035	0.336035	15	24	0.00203459	9606	Homo sapiens	P02751	P02751			R-HSA-354149;R-HSA-429415;R-HSA-354087;R-HSA-372705;R-HSA-429441;R-HSA-377644;R-HSA-354124;R-HSA-377641;R-HSA-377640;R-HSA-377643;R-HSA-372693;R-HSA-354165;R-HSA-354066;R-HSA-372697;R-HSA-354073
	R-HSA-201681	TCF dependent signaling in response to WNT	Signal Transduction (Homo sapiens)	0.337688	3	1	0.0181247	32	0.00601899	202	1	940	0.0181247	0.337688	0.337688	32	71	0.00601899	9606	Homo sapiens	P48436;P35222;O94907	P48436;P35222;O94907	P35222	Q9NSA3;O14746;P25054;Q5JTC6;Q9Y297;Q9Y265;Q9Y2T1;Q9NYF0;P49841;Q6P1J9	R-HSA-3769401;R-HSA-3299569;R-HSA-3322422;R-HSA-201669;R-HSA-3601585;R-HSA-3769393;R-HSA-3769392;R-HSA-3364026;R-HSA-3322427;R-HSA-3322424;R-HSA-3769394;R-HSA-4411351;R-HSA-5368580;R-HSA-3769391;R-HSA-201685;R-HSA-5323526;R-HSA-5368586;R-HSA-3364014;R-HSA-5665608;R-HSA-3769383;R-HSA-4411357;R-HSA-3361751;R-HSA-4411367;R-HSA-3451153;R-HSA-1458875;R-HSA-5626938;R-HSA-4411372;R-HSA-201712;R-HSA-3772…
	R-HSA-888590	GABA synthesis, release, reuptake and degradation	Neuronal System (Homo sapiens)	0.338588	0	1	0.0017048	1	0.00076297	19	1	201	0.0017048	0.338588	0.338588	1	9	0.00076297	9606	Homo sapiens			Q16853	Q16623	R-HSA-917744
	R-HSA-3232142	SUMOylation of ubiquitinylation proteins	Metabolism of proteins (Homo sapiens)	0.338588	0	1	0.00385823	1	0.000254323	43	1	178	0.00385823	0.338588	0.338588	1	3	0.000254323	9606	Homo sapiens			P02751	P40337	R-HSA-4551721
	R-HSA-8939236	RUNX1 regulates transcription of genes involved in differentiation of HSCs	Gene expression (Transcription) (Homo sapiens)	0.342399	0	1	0.00888291	3	0.00127162	99	1	124	0.00888291	0.342399	0.342399	3	15	0.00127162	9606	Homo sapiens			P35222	P46937;P00519	R-HSA-8956639;R-HSA-8956659;R-HSA-8956676
	R-HSA-168898	Toll-like Receptor Cascades	Immune System (Homo sapiens)	0.345682	0	2	0.0139973	4	0.015429	156	2	548	0.0139973	0.345682	0.345682	4	182	0.015429	9606	Homo sapiens			P35222;P35453	P05412;P19838	R-HSA-450292;R-HSA-451634;R-HSA-168440;R-HSA-168136
	R-HSA-8939902	Regulation of RUNX2 expression and activity	Gene expression (Transcription) (Homo sapiens)	0.348704	0	1	0.00663975	2	0.00271278	74	1	152	0.00663975	0.348704	0.348704	2	32	0.00271278	9606	Homo sapiens			P35222	P49841	R-HSA-9008475;R-HSA-9008476
	R-HSA-2151201	Transcriptional activation of mitochondrial biogenesis	Organelle biogenesis and maintenance (Homo sapiens)	0.349958	0	1	0.0051144	10	0.00271278	57	1	180	0.0051144	0.349958	0.349958	10	32	0.00271278	9606	Homo sapiens			Q14192	Q16656	R-HSA-1592249;R-HSA-1592250;R-HSA-2466391;R-HSA-2466369;R-HSA-1592236;R-HSA-2466370;R-HSA-2466367;R-HSA-1592242;R-HSA-1592245;R-HSA-2466392
	R-HSA-4615885	SUMOylation of DNA replication proteins	Metabolism of proteins (Homo sapiens)	0.352459	0	1	0.00448632	3	0.000678196	50	1	188	0.00448632	0.352459	0.352459	3	8	0.000678196	9606	Homo sapiens			P35222	P11388	R-HSA-4641350;R-HSA-5228525;R-HSA-4641342
	R-HSA-162909	Host Interactions of HIV factors	Disease (Homo sapiens)	0.352674	0	2	0.0129206	3	0.00457782	144	2	534	0.0129206	0.352674	0.352674	3	54	0.00457782	9606	Homo sapiens			P35222;P02751	Q9Y297;P06241;P63208	R-HSA-180599;R-HSA-180591;R-HSA-200908
	R-HSA-5685938	HDR through Single Strand Annealing (SSA)	DNA Repair (Homo sapiens)	0.353706	0	1	0.00331987	1	0.000508647	37	1	201	0.00331987	0.353706	0.353706	1	6	0.000508647	9606	Homo sapiens			P35222	P00519	R-HSA-5686587
	R-HSA-73894	DNA Repair	DNA Repair (Homo sapiens)	0.357368	0	3	0.0280843	10	0.0275517	313	3	922	0.0280843	0.357368	0.357368	10	325	0.0275517	9606	Homo sapiens			P02751;P35222;Q14192	P38398;Q9UBZ9;P52292;P00519	R-HSA-5684006;R-HSA-110307;R-HSA-5659781;R-HSA-5686578;R-HSA-5656158;R-HSA-5655965;R-HSA-5686587;R-HSA-5655835;R-HSA-5684008;R-HSA-5656105
	R-HSA-388841	Costimulation by the CD28 family	Immune System (Homo sapiens)	0.357433	0	1	0.00789592	1	0.00288233	88	1	154	0.00789592	0.357433	0.357433	1	34	0.00288233	9606	Homo sapiens			P02751	P06241	R-HSA-389354
	R-HSA-2173789	TGF-beta receptor signaling activates SMADs	Signal Transduction (Homo sapiens)	0.357433	1	1	0.00287124	20	0.00330621	32	1	210	0.00287124	0.357433	0.357433	20	39	0.00330621	9606	Homo sapiens	P01137	P01137	P01137	P37173	R-HSA-170850;R-HSA-178178;R-HSA-2128994;R-HSA-178218;R-HSA-173483;R-HSA-4332235;R-HSA-173512;R-HSA-2127562;R-HSA-170861;R-HSA-178189;R-HSA-177107;R-HSA-170835;R-HSA-170868;R-HSA-2169046;R-HSA-170843;R-HSA-2179291;R-HSA-2169050;R-HSA-170846;R-HSA-2179293;R-HSA-170844
	R-HSA-170834	Signaling by TGF-beta Receptor Complex	Signal Transduction (Homo sapiens)	0.358252	1	2	0.00655002	26	0.00695151	73	2	614	0.00655002	0.358252	0.358252	26	82	0.00695151	9606	Homo sapiens	P01137	P01137	P01137;P35222	Q9GZV5;P37173	R-HSA-178178;R-HSA-2128994;R-HSA-2160931;R-HSA-2160932;R-HSA-2160935;R-HSA-4332235;R-HSA-173512;R-HSA-178189;R-HSA-177107;R-HSA-170835;R-HSA-2134519;R-HSA-170843;R-HSA-170846;R-HSA-170844;R-HSA-170850;R-HSA-2134532;R-HSA-2031355;R-HSA-178218;R-HSA-173483;R-HSA-2127562;R-HSA-170861;R-HSA-170868;R-HSA-2169046;R-HSA-2179291;R-HSA-2169050;R-HSA-2179293
	R-HSA-1912422	Pre-NOTCH Expression and Processing	Signal Transduction (Homo sapiens)	0.358671	0	1	0.00699865	1	0.00313666	78	1	159	0.00699865	0.358671	0.358671	1	37	0.00313666	9606	Homo sapiens			P35453	P05412	R-HSA-1912401
	R-HSA-5250924	B-WICH complex positively regulates rRNA expression	ene expression (Transcription) (Homo sapiens)	0.361139	0	1	0.00538358	1	0.000254323	60	1	181	0.00538358	0.361139	0.361139	1	3	0.000254323	9606	Homo sapiens			P35222	P49841	R-HSA-5250947
	R-HSA-8939211	ESR-mediated signaling	Signal Transduction (Homo sapiens)	0.36162	0	3	0.0174966	6	0.00907087	195	3	978	0.0174966	0.36162	0.36162	6	107	0.00907087	9606	Homo sapiens			P02751;P35222;Q14192	Q9NYA1;P25490;P52292;P12931;O15169;Q92793	R-HSA-9009065;R-HSA-8932076;R-HSA-9625814;R-HSA-9021596;R-HSA-9038052;R-HSA-9012196
	R-HSA-3371556	Cellular response to heat stress	Cellular responses to external stimuli (Homo sapiens)	0.36237	0	1	0.008524	1	0.00245846	95	1	153	0.008524	0.36237	0.36237	1	29	0.00245846	9606	Homo sapiens			P35222	P49841	R-HSA-3371435
	R-HSA-1538133	G0 and Early G1	Cell Cycle (Homo sapiens)	0.368489	0	1	0.00242261	1	0.00228891	27	1	234	0.00242261	0.368489	0.368489	1	27	0.00228891	9606	Homo sapiens			P35222	P11388	R-HSA-8964531
	R-HSA-2029482	Regulation of actin dynamics for phagocytic cup formation	Immune System (Homo sapiens)	0.369706	0	1	0.013459	1	0.00203459	150	1	106	0.013459	0.369706	0.369706	1	24	0.00203459	9606	Homo sapiens			P35222	P00519	R-HSA-2130194
	R-HSA-2262752	Cellular responses to stress	Cellular responses to external stimuli (Homo sapiens)	0.384952	0	3	0.0366083	5	0.0153442	408	3	856	0.0366083	0.384952	0.384952	5	181	0.0153442	9606	Homo sapiens			P01137;P35222;P35453	P07237;P05412;Q92793;P49841	R-HSA-450292;R-HSA-3341296;R-HSA-1234167;R-HSA-3371435;R-HSA-168136
	R-HSA-9006931	Signaling by Nuclear Receptors	Signal Transduction (Homo sapiens)	0.385481	0	3	0.0213549	6	0.0108511	238	3	983	0.0213549	0.385481	0.385481	6	128	0.0108511	9606	Homo sapiens			P02751;P35222;Q14192	Q9NYA1;P25490;P52292;P12931;O15169;Q92793	R-HSA-9009065;R-HSA-8932076;R-HSA-9625814;R-HSA-9021596;R-HSA-9038052;R-HSA-9012196
	R-HSA-109606	Intrinsic Pathway for Apoptosis	Programmed Cell Death (Homo sapiens)	0.390052	0	1	0.00457604	2	0.00508647	51	1	237	0.00457604	0.390052	0.390052	2	60	0.00508647	9606	Homo sapiens			Q14192	Q9Y2G2	R-HSA-114256;R-HSA-6805426
	R-HSA-5620920	Cargo trafficking to the periciliary membrane	Organelle biogenesis and maintenance (Homo sapiens)	0.391228	0	1	0.00457604	1	0.00228891	51	1	229	0.00457604	0.391228	0.391228	1	27	0.00228891	9606	Homo sapiens			Q16853	Q3SXY8	R-HSA-5624953
	R-HSA-2894862	Constitutive Signaling by NOTCH1 HD+PEST Domain Mutants	Disease (Homo sapiens)	0.392403	0	1	0.00529385	2	0.00178026	59	1	212	0.00529385	0.392403	0.392403	2	21	0.00178026	9606	Homo sapiens			P35222	Q92793	R-HSA-2220964;R-HSA-2220971
	R-HSA-2644606	Constitutive Signaling by NOTCH1 PEST Domain Mutants	Disease (Homo sapiens)	0.392403	0	1	0.00529385	2	0.00178026	59	1	212	0.00529385	0.392403	0.392403	2	21	0.00178026	9606	Homo sapiens			P35222	Q92793	R-HSA-2220964;R-HSA-2220971
	R-HSA-8874211	CREB3 factors activate genes	Metabolism of proteins (Homo sapiens)	0.392403	0	1	0.000807537	4	0.00178026	9	1	251	0.000807537	0.392403	0.392403	4	21	0.00178026	9606	Homo sapiens			Q16853	Q96BA8	R-HSA-8874212;R-HSA-8874194;R-HSA-8874193;R-HSA-8874184
	R-HSA-2894858	Signaling by NOTCH1 HD+PEST Domain Mutants in Cancer	Disease (Homo sapiens)	0.392403	0	1	0.00529385	2	0.00178026	59	1	212	0.00529385	0.392403	0.392403	2	21	0.00178026	9606	Homo sapiens			P35222	Q92793	R-HSA-2220964;R-HSA-2220971
	R-HSA-2644603	Signaling by NOTCH1 in Cancer	Disease (Homo sapiens)	0.392403	0	1	0.00529385	2	0.00330621	59	1	212	0.00529385	0.392403	0.392403	2	39	0.00330621	9606	Homo sapiens			P35222	Q92793	R-HSA-2220964;R-HSA-2220971
	R-HSA-2644602	Signaling by NOTCH1 PEST Domain Mutants in Cancer	Disease (Homo sapiens)	0.392403	0	1	0.00529385	2	0.00178026	59	1	212	0.00529385	0.392403	0.392403	2	21	0.00178026	9606	Homo sapiens			P35222	Q92793	R-HSA-2220964;R-HSA-2220971
	R-HSA-164952	The role of Nef in HIV-1 replication and disease pathogenesis	Disease (Homo sapiens)	0.393575	0	1	0.00260206	1	0.00169549	29	1	242	0.00260206	0.393575	0.393575	1	20	0.00169549	9606	Homo sapiens			P02751	P06241	R-HSA-200908
	R-HSA-3214847	HATs acetylate histones	Chromatin organization (Homo sapiens)	0.407474	0	1	0.00969044	1	0.00127162	108	1	177	0.00969044	0.407474	0.407474	1	15	0.00127162	9606	Homo sapiens			P35222	Q92793	R-HSA-3697008
	R-HSA-1280215	Cytokine Signaling in Immune system	Cytokine Signaling in Immune system	0.40779	3	4	0.0697174	11	0.0542557	777	4	2189	0.0697174	0.40779	0.40779	11	640	0.0542557	9606	Homo sapiens	P08123;P01137;P02751	P08123;P01137;P02751	P01137;P35222;P35453;Q16853	P07237;P05412;P19838;Q16623;P18146	R-HSA-6785895;R-HSA-8950456;R-HSA-450292;R-HSA-451634;R-HSA-6789615;R-HSA-1015702;R-HSA-8950113;R-HSA-168440;R-HSA-168136;R-HSA-449117;R-HSA-8950183
	R-HSA-112310	Neurotransmitter release cycle	Neuronal System (Homo sapiens)	0.408618	0	1	0.00457604	6	0.00271278	51	1	228	0.00457604	0.408618	0.408618	6	32	0.00271278	9606	Homo sapiens			Q16853	Q16623	R-HSA-210426;R-HSA-380574;R-HSA-372505;R-HSA-380905;R-HSA-917744;R-HSA-374922
	R-HSA-112314	Neurotransmitter receptors and postsynaptic signal transmission	Neuronal System (Homo sapiens)	0.409038	0	2	0.0185734	3	0.00890132	207	2	543	0.0185734	0.409038	0.409038	3	105	0.00890132	9606	Homo sapiens			P02751;P35222	P52292;P12931	R-HSA-9619127;R-HSA-9612085;R-HSA-112282
	R-HSA-2871796	FCERI mediated MAPK activation	Immune System (Homo sapiens)	0.40976	0	1	0.0105877	2	0.00169549	118	1	165	0.0105877	0.40976	0.40976	2	20	0.00169549	9606	Homo sapiens			P35453	P05412	R-HSA-450292;R-HSA-168136
	R-HSA-912446	Meiotic recombination	Cell Cycle (Homo sapiens)	0.413174	0	1	0.00502467	1	0.00076297	56	1	239	0.00502467	0.413174	0.413174	1	9	0.00076297	9606	Homo sapiens			Q14192	P38398	R-HSA-912503
	R-HSA-2122947	NOTCH1 Intracellular Domain Regulates Transcription	Signal Transduction (Homo sapiens)	0.415438	0	1	0.00430686	2	0.00135639	48	1	245	0.00430686	0.415438	0.415438	2	16	0.00135639	9606	Homo sapiens			P35222	Q92793	R-HSA-1912394;R-HSA-1912391
	R-HSA-381119	Unfolded Protein Response (UPR)	Metabolism of proteins (Homo sapiens)	0.416442	0	2	0.00807537	5	0.0079688	90	2	669	0.00807537	0.416442	0.416442	5	94	0.0079688	9606	Homo sapiens			Q14192;Q16853	P18847;Q96BA8	R-HSA-8874212;R-HSA-8874194;R-HSA-8874193;R-HSA-1791173;R-HSA-8874184
	R-HSA-5250941	Negative epigenetic regulation of rRNA expression	Gene expression (Transcription) (Homo sapiens)	0.416568	0	1	0.00699865	1	0.000932519	78	1	217	0.00699865	0.416568	0.416568	1	11	0.000932519	9606	Homo sapiens			P35222	P26358	R-HSA-427409
	R-HSA-4086400	PCP/CE pathway	Signal Transduction (Homo sapiens)	0.416568	0	1	0.00825482	1	0.00203459	92	1	195	0.00825482	0.416568	0.416568	1	24	0.00203459	9606	Homo sapiens			P35222	Q14160	R-HSA-4608862
	R-HSA-917937	Iron uptake and transport	Transport of small molecules (Homo sapiens)	0.417695	0	1	0.00520413	1	0.00288233	58	1	232	0.00520413	0.417695	0.417695	1	34	0.00288233	9606	Homo sapiens			P35222	P63208	R-HSA-5691167
	R-HSA-5633008	TP53 Regulates Transcription of Cell Death Genes	Gene expression (Transcription) (Homo sapiens)	0.429955	0	1	0.00394796	2	0.00567989	44	1	266	0.00394796	0.429955	0.429955	2	67	0.00567989	9606	Homo sapiens			P35222	Q92793;Q92597	R-HSA-5633314;R-HSA-6797993
	R-HSA-9006936	Signaling by TGF-beta family members	Signal Transduction (Homo sapiens)	0.430459	1	2	0.00915209	26	0.00907087	102	2	696	0.00915209	0.430459	0.430459	26	107	0.00907087	9606	Homo sapiens	P01137	P01137	P01137;P35222	Q9GZV5;P37173	R-HSA-178178;R-HSA-2128994;R-HSA-2160931;R-HSA-2160932;R-HSA-2160935;R-HSA-4332235;R-HSA-173512;R-HSA-178189;R-HSA-177107;R-HSA-170835;R-HSA-2134519;R-HSA-170843;R-HSA-170846;R-HSA-170844;R-HSA-170850;R-HSA-2134532;R-HSA-2031355;R-HSA-178218;R-HSA-173483;R-HSA-2127562;R-HSA-170861;R-HSA-170868;R-HSA-2169046;R-HSA-2179291;R-HSA-2169050;R-HSA-2179293
	R-HSA-418594	G alpha (i) signalling events	Signal Transduction (Homo sapiens)	0.437736	0	2	0.0366083	4	0.0128009	408	2	380	0.0366083	0.437736	0.437736	4	151	0.0128009	9606	Homo sapiens			P02751;P35222	P52292;P12931	R-HSA-8964329;R-HSA-9619127;R-HSA-112282;R-HSA-8964311
	R-HSA-112316	Neuronal System	Neuronal System (Homo sapiens)	0.440447	0	3	0.0375953	9	0.0174635	419	3	882	0.0375953	0.440447	0.440447	9	206	0.0174635	9606	Homo sapiens			P02751;P35222;Q16853	Q16623;P52292;P12931	R-HSA-9619127;R-HSA-9612085;R-HSA-210426;R-HSA-112282;R-HSA-380574;R-HSA-372505;R-HSA-380905;R-HSA-917744;R-HSA-374922
	R-HSA-5688426	Deubiquitination	Metabolism of proteins (Homo sapiens)	0.442999	1	1	0.0253028	2	0.00652764	282	1	593	0.0253028	0.442999	0.442999	2	77	0.00652764	9606	Homo sapiens	P01137	P01137	P35222	P25054	R-HSA-6781905;R-HSA-2179291
	R-HSA-449836	Other interleukin signaling	Immune System (Homo sapiens)	0.446272	0	1	0.00233288	1	0.00161072	26	1	291	0.00233288	0.446272	0.446272	1	19	0.00161072	9606	Homo sapiens			Q16853	Q16623	R-HSA-449117
	R-HSA-5250913	Positive epigenetic regulation of rRNA expression	Gene expression (Transcription) (Homo sapiens)	0.447343	0	1	0.00672948	1	0.000593421	75	1	251	0.00672948	0.447343	0.447343	1	7	0.000593421	9606	Homo sapiens			P35222	P49841	R-HSA-5250947
	R-HSA-2559580	Oxidative Stress Induced Senescence	Cellular responses to external stimuli (Homo sapiens)	0.448413	0	1	0.00843428	2	0.00330621	94	1	237	0.00843428	0.448413	0.448413	2	39	0.00330621	9606	Homo sapiens			P35453	P05412	R-HSA-450292;R-HSA-168136
	R-HSA-211859	Biological oxidations	Metabolism (Homo sapiens)	0.44948	1	0	0.0199192	1	0.0149203	222	0	89	0.0199192	0.44948	0.44948	1	176	0.0149203	9606	Homo sapiens	Q16853	Q16853			R-HSA-5696183
	R-HSA-5689896	Ovarian tumor domain proteases	Metabolism of proteins (Homo sapiens)	0.451609	0	1	0.0034096	1	0.00118684	38	1	285	0.0034096	0.451609	0.451609	1	14	0.00118684	9606	Homo sapiens			P35222	P25054	R-HSA-6781905
	R-HSA-909733	Interferon alpha/beta signaling	Immune System (Homo sapiens)	0.452671	0	1	0.0122925	1	0.00169549	137	1	188	0.0122925	0.452671	0.452671	1	20	0.00169549	9606	Homo sapiens			P35222	P18146	R-HSA-1015702
	R-HSA-1280218	Adaptive Immune System	Immune System (Homo sapiens)	0.457015	2	2	0.0846119	4	0.0220414	943	2	1036	0.0846119	0.457015	0.457015	4	260	0.0220414	9606	Homo sapiens	P02461;P08123	P02461;P08123	P35222;P02751	P06241;P12830	R-HSA-5696356;R-HSA-5696357;R-HSA-199079;R-HSA-389354
	R-HSA-157118	Signaling by NOTCH	Signal Transduction (Homo sapiens)	0.458638	0	2	0.0183939	4	0.0128009	205	2	645	0.0183939	0.458638	0.458638	4	151	0.0128009	9606	Homo sapiens			P35222;P35453	P05412;P49757;Q92793	R-HSA-1912394;R-HSA-1912391;R-HSA-1912401;R-HSA-1980128
	R-HSA-8953750	Transcriptional Regulation by E2F6	Gene expression (Transcription) (Homo sapiens)	0.458998	0	1	0.0030507	1	0.00279756	34	1	304	0.0030507	0.458998	0.458998	1	33	0.00279756	9606	Homo sapiens			Q14192	P38398	R-HSA-9007605
	R-HSA-9020702	Interleukin-1 signaling	Immune System (Homo sapiens)	0.463177	0	1	0.00915209	1	0.00389963	102	1	263	0.00915209	0.463177	0.463177	1	46	0.00389963	9606	Homo sapiens			P35222	P19838	R-HSA-451634
	R-HSA-8864260	Transcriptional regulation by the AP-2 (TFAP2) family of transcription factors	Gene expression (Transcription) (Homo sapiens)	0.463799	0	2	0.00331987	3	0.00373008	37	2	795	0.00331987	0.463799	0.463799	3	44	0.00373008	9606	Homo sapiens			P35222;Q14192	P25490;Q99697;Q92793	R-HSA-8864453;R-HSA-8864307;R-HSA-8864729
	R-HSA-2029480	Fcgamma receptor (FCGR) dependent phagocytosis	Fcgamma receptor (FCGR) dependent phagocytosis	0.465255	0	1	0.0157021	1	0.00356053	175	1	172	0.0157021	0.465255	0.465255	1	42	0.00356053	9606	Homo sapiens			P35222	P00519	R-HSA-2130194
	R-HSA-5673001	RAF/MAP kinase cascade	Signal Transduction (Homo sapiens)	0.465255	1	0	0.0232391	4	0.00330621	259	0	86	0.0232391	0.465255	0.465255	4	39	0.00330621	9606	Homo sapiens	P02751	P02751			R-HSA-5672980;R-HSA-5672978;R-HSA-5672972;R-HSA-5672973
	R-HSA-1834949	Cytosolic sensors of pathogen-associated DNA	Immune System (Homo sapiens)	0.467325	1	0	0.00565276	4	0.00406918	63	0	283	0.00565276	0.467325	0.467325	4	48	0.00406918	9606	Homo sapiens	P35222	P35222			R-HSA-3134904;R-HSA-3134901;R-HSA-3134883;R-HSA-3134914
	R-HSA-1980143	Signaling by NOTCH1	Signal Transduction (Homo sapiens)	0.473488	0	1	0.00663975	3	0.00313666	74	1	276	0.00663975	0.473488	0.473488	3	37	0.00313666	9606	Homo sapiens			P35222	P49757;Q92793	R-HSA-1912394;R-HSA-1912391;R-HSA-1980128
	R-HSA-1221632	Meiotic synapsis	Cell Cycle (Homo sapiens)	0.479582	0	1	0.00538358	1	0.000508647	60	1	291	0.00538358	0.479582	0.479582	1	6	0.000508647	9606	Homo sapiens			Q14192	P38398	R-HSA-912467
	R-HSA-8953897	Cellular responses to external stimuli	Cellular responses to external stimuli (Homo sapiens)	0.493255	0	3	0.0453118	5	0.02255	505	3	1010	0.0453118	0.493255	0.493255	5	266	0.02255	9606	Homo sapiens			P01137;P35222;P35453	P07237;P05412;Q92793;P49841	R-HSA-450292;R-HSA-3341296;R-HSA-1234167;R-HSA-3371435;R-HSA-168136
	R-HSA-162906	HIV Infection	Disease (Homo sapiens)	0.495435	0	2	0.0222521	3	0.0133096	248	2	669	0.0222521	0.495435	0.495435	3	157	0.0133096	9606	Homo sapiens			P35222;P02751	Q9Y297;P06241;P63208	R-HSA-180599;R-HSA-180591;R-HSA-200908
	R-HSA-111885	Opioid Signalling	Signal Transduction (Homo sapiens)	0.495501	0	1	0.00798564	2	0.00483215	89	1	273	0.00798564	0.495501	0.495501	2	57	0.00483215	9606	Homo sapiens			P02751	P52292	R-HSA-9619127;R-HSA-112282
	R-HSA-1852241	Organelle biogenesis and maintenance	Organelle biogenesis and maintenance (Homo sapiens)	0.499157	0	2	0.0267384	11	0.00729061	298	2	668	0.0267384	0.499157	0.499157	11	86	0.00729061	9606	Homo sapiens			Q14192;Q16853	Q16656;Q3SXY8	R-HSA-1592249;R-HSA-1592250;R-HSA-2466391;R-HSA-2466369;R-HSA-1592236;R-HSA-2466370;R-HSA-2466367;R-HSA-1592242;R-HSA-5624953;R-HSA-1592245;R-HSA-2466392
	R-HSA-2173796	SMAD2/SMAD3:SMAD4 heterotrimer regulates transcription	Gene expression (Transcription) (Homo sapiens)	0.499406	0	1	0.00287124	1	0.00144117	32	1	338	0.00287124	0.499406	0.499406	1	17	0.00144117	9606	Homo sapiens			P35222	Q9GZV5	R-HSA-2031355
	R-HSA-109581	Apoptosis	Programmed Cell Death (Homo sapiens)	0.500395	1	2	0.0159713	6	0.0117837	178	2	764	0.0159713	0.500395	0.500395	6	139	0.0117837	9606	Homo sapiens	P35222	P35222	P35222;Q14192	P25054;P12830;Q9Y2G2;Q01826	R-HSA-202947;R-HSA-114256;R-HSA-6805426;R-HSA-202939;R-HSA-352268;R-HSA-202969
	R-HSA-195721	Signaling by WNT	Signal Transduction (Homo sapiens)	0.501685	3	1	0.0266487	50	0.0132248	297	1	1174	0.0266487	0.501685	0.501685	50	156	0.0132248	9606	Homo sapiens	P48436;P35222;O94907	P48436;P35222;O94907	P35222	Q9NSA3;O14746;P25054;Q5JTC6;Q9Y297;Q9Y265;O15169;Q9Y2T1;Q9NYF0;Q14160;P49841;Q6P1J9	R-HSA-3769401;R-HSA-3322422;R-HSA-3601585;R-HSA-3769393;R-HSA-3769392;R-HSA-3364026;R-HSA-3322427;R-HSA-3322424;R-HSA-3769394;R-HSA-4411351;R-HSA-3769391;R-HSA-4608862;R-HSA-3364014;R-HSA-5665608;R-HSA-3769383;R-HSA-4411357;R-HSA-4411367;R-HSA-3451153;R-HSA-4411365;R-HSA-1458875;R-HSA-4411372;R-HSA-195251;R-HSA-5251555;R-HSA-4411383;R-HSA-5246693;R-HSA-5251557;R-HSA-3772430;R-HSA-4641147;R-HSA-34…
	R-HSA-3108214	SUMOylation of DNA damage response and repair proteins	Metabolism of proteins (Homo sapiens)	0.502316	0	1	0.00726783	2	0.00203459	81	1	299	0.00726783	0.502316	0.502316	2	24	0.00203459	9606	Homo sapiens			Q14192	P38398	R-HSA-2997709;R-HSA-2997616
	R-HSA-3858494	Beta-catenin independent WNT signaling	Signal Transduction (Homo sapiens)	0.503282	1	1	0.0128309	4	0.0043235	143	1	231	0.0128309	0.503282	0.503282	4	51	0.0043235	9606	Homo sapiens	P35222	P35222	P35222	Q14160	R-HSA-8944362;R-HSA-4411383;R-HSA-4411365;R-HSA-4608862
	R-HSA-373752	Netrin-1 signaling	Developmental Biology (Homo sapiens)	0.503282	0	1	0.00448632	1	0.00313666	50	1	327	0.00448632	0.503282	0.503282	1	37	0.00313666	9606	Homo sapiens			P35222	P12931	R-HSA-418859
	R-HSA-5663205	Infectious disease	Disease (Homo sapiens)	0.50563	2	2	0.0415433	9	0.0272126	463	2	1034	0.0415433	0.50563	0.50563	9	321	0.0272126	9606	Homo sapiens	P01137;P35222	P01137;P35222	P35222;P02751	Q9Y297;P06241;P12931;P63208	R-HSA-8876948;R-HSA-168865;R-HSA-180599;R-HSA-8876993;R-HSA-8876497;R-HSA-8877003;R-HSA-112333;R-HSA-180591;R-HSA-200908
	R-HSA-3232118	SUMOylation of transcription factors	Metabolism of proteins (Homo sapiens)	0.507129	0	1	0.00179453	1	0.000932519	20	1	359	0.00179453	0.507129	0.507129	1	11	0.000932519	9606	Homo sapiens			P35222	Q14526	R-HSA-4090281
	R-HSA-5357801	Programmed Cell Death	Programmed Cell Death (Homo sapiens)	0.508391	1	2	0.0164199	6	0.0128857	183	2	775	0.0164199	0.508391	0.508391	6	152	0.0128857	9606	Homo sapiens	P35222	P35222	P35222;Q14192	P25054;P12830;Q9Y2G2;Q01826	R-HSA-202947;R-HSA-114256;R-HSA-6805426;R-HSA-202939;R-HSA-352268;R-HSA-202969
	R-HSA-1592230	Mitochondrial biogenesis	Organelle biogenesis and maintenance (Homo sapiens)	0.514737	0	1	0.00861373	10	0.00305188	96	1	297	0.00861373	0.514737	0.514737	10	36	0.00305188	9606	Homo sapiens			Q14192	Q16656	R-HSA-1592249;R-HSA-1592250;R-HSA-2466391;R-HSA-2466369;R-HSA-1592236;R-HSA-2466370;R-HSA-2466367;R-HSA-1592242;R-HSA-1592245;R-HSA-2466392
	R-HSA-1257604	PIP3 activates AKT signaling	Signal Transduction (Homo sapiens)	0.527143	0	2	0.0247645	2	0.00729061	276	2	686	0.0247645	0.527143	0.527143	2	86	0.00729061	9606	Homo sapiens			P35222;P35453	P05412;P18146	R-HSA-8944078;R-HSA-8944047
	R-HSA-432720	Lysosome Vesicle Biogenesis	Vesicle-mediated transport (Homo sapiens)	0.540478	0	1	0.00331987	1	0.000678196	37	1	373	0.00331987	0.540478	0.540478	1	8	0.000678196	9606	Homo sapiens			P01137	P05067	R-HSA-5229132
	R-HSA-168254	Influenza Infection	Disease (Homo sapiens)	0.541373	1	0	0.0153432	1	0.00491692	171	0	255	0.0153432	0.541373	0.541373	1	58	0.00491692	9606	Homo sapiens	P01137	P01137			R-HSA-168865
	R-HSA-9020591	Interleukin-12 signaling	Immune System (Homo sapiens)	0.541373	0	1	0.00412741	2	0.00474737	46	1	372	0.00412741	0.541373	0.541373	2	56	0.00474737	9606	Homo sapiens			P01137	P07237	R-HSA-8950456;R-HSA-8950113
	R-HSA-69242	S Phase	Cell Cycle (Homo sapiens)	0.541373	0	1	0.0144459	1	0.00457782	161	1	288	0.0144459	0.541373	0.541373	1	54	0.00457782	9606	Homo sapiens			P35222	P49841	R-HSA-75820
	R-HSA-5684996	MAPK1/MAPK3 signaling	Signal Transduction (Homo sapiens)	0.544933	1	0	0.0238672	4	0.00389963	266	0	173	0.0238672	0.544933	0.544933	4	46	0.00389963	9606	Homo sapiens	P02751	P02751			R-HSA-5672980;R-HSA-5672978;R-HSA-5672972;R-HSA-5672973
	R-HSA-111465	Apoptotic cleavage of cellular proteins	Programmed Cell Death (Homo sapiens)	0.548467	1	1	0.0034096	4	0.00322143	38	1	389	0.0034096	0.548467	0.548467	4	38	0.00322143	9606	Homo sapiens	P35222	P35222	P35222	P25054;P12830;Q01826	R-HSA-202947;R-HSA-202939;R-HSA-352268;R-HSA-202969
	R-HSA-8866910	TFAP2 (AP-2) family regulates transcription of growth factors and their receptors	Gene expression (Transcription) (Homo sapiens)	0.552848	0	1	0.00116644	1	0.00152594	13	1	411	0.00116644	0.552848	0.552848	1	18	0.00152594	9606	Homo sapiens			Q14192	P25490	R-HSA-8864453
	R-HSA-3899300	SUMOylation of transcription cofactors	Metabolism of proteins (Homo sapiens)	0.561485	0	1	0.00394796	1	0.00228891	44	1	398	0.00394796	0.561485	0.561485	1	27	0.00228891	9606	Homo sapiens			P35222	Q92793	R-HSA-3927959
	R-HSA-382551	Transport of small molecules	Transport of small molecules (Homo sapiens)	0.564819	0	3	0.06559	4	0.0367921	731	3	858	0.06559	0.564819	0.564819	4	434	0.0367921	9606	Homo sapiens			P02751;P35222;Q14192	P08519;P63208;Q5SW96	R-HSA-174706;R-HSA-171141;R-HSA-5691167;R-HSA-176879
	R-HSA-1989781	PPARA activates gene expression	Metabolism (Homo sapiens)	0.577452	1	1	0.0105877	1	0.00347575	118	1	339	0.0105877	0.577452	0.577452	1	41	0.00347575	9606	Homo sapiens	Q14192	Q14192	Q14192	Q14192	R-HSA-1989747
	R-HSA-75153	Apoptotic execution phase	Programmed Cell Death (Homo sapiens)	0.578277	1	1	0.00466577	4	0.00483215	52	1	414	0.00466577	0.578277	0.578277	4	57	0.00483215	9606	Homo sapiens	P35222	P35222	P35222	P25054;P12830;Q01826	R-HSA-202947;R-HSA-202939;R-HSA-352268;R-HSA-202969
	R-HSA-983231	Factors involved in megakaryocyte development and platelet production	Hemostasis (Homo sapiens)	0.582377	0	1	0.0143562	1	0.0036453	160	1	313	0.0143562	0.582377	0.582377	1	43	0.0036453	9606	Homo sapiens			P35222	P00519	R-HSA-1013833
	R-HSA-2980736	Peptide hormone metabolism	Metabolism of proteins (Homo sapiens)	0.583192	1	0	0.00798564	1	0.00525602	89	0	380	0.00798564	0.583192	0.583192	1	62	0.00525602	9606	Homo sapiens	P35222	P35222			R-HSA-381799
	R-HSA-5633007	Regulation of TP53 Activity	Gene expression (Transcription) (Homo sapiens)	0.588842	0	2	0.0143562	2	0.0083079	160	2	903	0.0143562	0.588842	0.588842	2	98	0.0083079	9606	Homo sapiens			P01137;Q14192	Q8N9N5;Q12837	R-HSA-6804425;R-HSA-3221982
	R-HSA-195253	Degradation of beta-catenin by the destruction complex	Signal Transduction (Homo sapiens)	0.593652	1	1	0.00735756	14	0.00186504	82	1	398	0.00735756	0.593652	0.593652	14	22	0.00186504	9606	Homo sapiens	P35222	P35222	P35222	P25054;Q5JTC6;O15169;P49841	R-HSA-195300;R-HSA-2130279;R-HSA-195275;R-HSA-195304;R-HSA-2130282;R-HSA-2130286;R-HSA-195283;R-HSA-195251;R-HSA-195280;R-HSA-5251555;R-HSA-195318;R-HSA-195287;R-HSA-5246693;R-HSA-5251557
	R-HSA-400206	Regulation of lipid metabolism by Peroxisome proliferator-activated receptor alpha (PPARalpha)	Metabolism (Homo sapiens)	0.597606	1	1	0.0107672	1	0.00373008	120	1	367	0.0107672	0.597606	0.597606	1	44	0.00373008	9606	Homo sapiens	Q14192	Q14192	Q14192	Q14192	R-HSA-1989747
	R-HSA-400253	Circadian Clock	Circadian Clock (Homo sapiens)	0.598393	0	1	0.00610139	2	0.0050017	68	1	427	0.00610139	0.598393	0.598393	2	59	0.0050017	9606	Homo sapiens			P35222	Q9Y297	R-HSA-400267;R-HSA-400219
	R-HSA-2454202	Fc epsilon receptor (FCERI) signaling	Immune System (Homo sapiens)	0.601524	0	1	0.0194706	2	0.00534079	217	1	296	0.0194706	0.601524	0.601524	2	63	0.00534079	9606	Homo sapiens			P35453	P05412	R-HSA-450292;R-HSA-168136
	R-HSA-3108232	SUMO E3 ligases SUMOylate target proteins	Metabolism of proteins (Homo sapiens)	0.603038	0	3	0.0156124	12	0.0110207	174	3	1529	0.0156124	0.603038	0.603038	12	130	0.0110207	9606	Homo sapiens			P02751;P35222;Q14192	P38398;Q14526;P40337;P11388;Q92793;P10275;P26358;Q01826	R-HSA-4655431;R-HSA-4641350;R-HSA-2997709;R-HSA-5228525;R-HSA-4090281;R-HSA-4615905;R-HSA-4090390;R-HSA-4641342;R-HSA-4615839;R-HSA-3927959;R-HSA-4551721;R-HSA-2997616
	R-HSA-3700989	Transcriptional Regulation by TP53	Gene expression (Transcription) (Homo sapiens)	0.604785	0	3	0.0329296	4	0.0218718	367	3	1367	0.0329296	0.604785	0.604785	4	258	0.0218718	9606	Homo sapiens			P01137;P35222;Q14192	Q8N9N5;Q92793;Q92597;Q12837	R-HSA-5633314;R-HSA-6797993;R-HSA-6804425;R-HSA-3221982
	R-HSA-5693567	HDR through Homologous Recombination (HRR) or Single Strand Annealing (SSA)	DNA Repair (Homo sapiens)	0.610776	0	1	0.0102288	1	0.00356053	114	1	415	0.0102288	0.610776	0.610776	1	42	0.00356053	9606	Homo sapiens			P35222	P00519	R-HSA-5686587
	R-HSA-5621481	C-type lectin receptors (CLRs)	Immune System (Homo sapiens)	0.612297	0	1	0.0155227	1	0.00576467	173	1	364	0.0155227	0.612297	0.612297	1	68	0.00576467	9606	Homo sapiens			P35222	Q04206	R-HSA-5660980
	R-HSA-376176	Signaling by ROBO receptors	Developmental Biology (Homo sapiens)	0.612297	0	1	0.0195603	1	0.0050017	218	1	292	0.0195603	0.612297	0.612297	1	59	0.0050017	9606	Homo sapiens			P35222	P12931	R-HSA-9011241
	R-HSA-2173793	Transcriptional activity of SMAD2/SMAD3:SMAD4 heterotrimer	Gene expression (Transcription) (Homo sapiens)	0.612297	0	1	0.00394796	1	0.00322143	44	1	467	0.00394796	0.612297	0.612297	1	38	0.00322143	9606	Homo sapiens			P35222	Q9GZV5	R-HSA-2031355
	R-HSA-5693538	Homology Directed Repair	DNA Repair (Homo sapiens)	0.614569	0	1	0.0107672	1	0.00423872	120	1	418	0.0107672	0.614569	0.614569	1	50	0.00423872	9606	Homo sapiens			P35222	P00519	R-HSA-5686587
	R-HSA-2990846	SUMOylation	Metabolism of proteins (Homo sapiens)	0.618599	0	3	0.0161507	12	0.0117837	180	3	1565	0.0161507	0.618599	0.618599	12	139	0.0117837	9606	Homo sapiens			P02751;P35222;Q14192	P38398;Q14526;P40337;P11388;Q92793;P10275;P26358;Q01826	R-HSA-4655431;R-HSA-4641350;R-HSA-2997709;R-HSA-5228525;R-HSA-4090281;R-HSA-4615905;R-HSA-4090390;R-HSA-4641342;R-HSA-4615839;R-HSA-3927959;R-HSA-4551721;R-HSA-2997616
	R-HSA-450531	Regulation of mRNA stability by proteins that bind AU-rich elements	Metabolism of RNA (Homo sapiens)	0.61982	0	1	0.00789592	2	0.00220414	88	1	429	0.00789592	0.61982	0.61982	2	26	0.00220414	9606	Homo sapiens			Q14192	Q9NPI6	R-HSA-450431;R-HSA-450488
	R-HSA-212165	Epigenetic regulation of gene expression	Gene expression (Transcription) (Homo sapiens)	0.628659	0	1	0.010498	3	0.00279756	117	1	435	0.010498	0.628659	0.628659	3	33	0.00279756	9606	Homo sapiens			P35222	P26358;P49841	R-HSA-5334160;R-HSA-5250947;R-HSA-427409
	R-HSA-5653656	Vesicle-mediated transport	Vesicle-mediated transport (Homo sapiens)	0.630017	2	1	0.0682817	2	0.0212784	761	1	1052	0.0682817	0.630017	0.630017	2	251	0.0212784	9606	Homo sapiens	P02461;P08123	P02461;P08123	P01137	P05067	R-HSA-3221843;R-HSA-5229132
	R-HSA-1500620	Meiosis	Cell Cycle (Homo sapiens)	0.635158	0	1	0.00789592	2	0.00127162	88	1	463	0.00789592	0.635158	0.635158	2	15	0.00127162	9606	Homo sapiens			Q14192	P38398	R-HSA-912503;R-HSA-912467
	R-HSA-5617833	Cilium Assembly	Organelle biogenesis and maintenance (Homo sapiens)	0.6373	0	1	0.0181247	1	0.00423872	202	1	391	0.0181247	0.6373	0.6373	1	50	0.00423872	9606	Homo sapiens			Q16853	Q3SXY8	R-HSA-5624953
	R-HSA-4551638	SUMOylation of chromatin organization proteins	Metabolism of proteins (Homo sapiens)	0.638721	0	1	0.00556303	2	0.00127162	62	1	478	0.00556303	0.638721	0.638721	2	15	0.00127162	9606	Homo sapiens			P35222	Q01826	R-HSA-4615905;R-HSA-4615839
	R-HSA-446652	Interleukin-1 family signaling	Immune System (Homo sapiens)	0.65332	0	1	0.0126514	1	0.00669719	141	1	457	0.0126514	0.65332	0.65332	1	79	0.00669719	9606	Homo sapiens			P35222	P19838	R-HSA-451634
	R-HSA-1474165	Reproduction	Reproduction (Homo sapiens)	0.656711	0	1	0.0102288	2	0.00203459	114	1	468	0.0102288	0.656711	0.656711	2	24	0.00203459	9606	Homo sapiens			Q14192	P38398	R-HSA-912503;R-HSA-912467
	R-HSA-453279	Mitotic G1-G1/S phases	Cell Cycle (Homo sapiens)	0.65873	0	1	0.0133692	1	0.0083079	149	1	467	0.0133692	0.65873	0.65873	1	98	0.0083079	9606	Homo sapiens			P35222	P11388	R-HSA-8964531
	R-HSA-69275	G2/M Transition	Cell Cycle (Homo sapiens)	0.660738	0	1	0.0177658	10	0.00661241	198	1	396	0.0177658	0.660738	0.660738	10	78	0.00661241	9606	Homo sapiens			P35222	P63208;Q08050	R-HSA-4088141;R-HSA-8854052;R-HSA-4088024;R-HSA-4088134;R-HSA-4088439;R-HSA-4088309;R-HSA-4088162;R-HSA-4088130;R-HSA-4088306;R-HSA-4088307
	R-HSA-453274	Mitotic G2-G2/M phases	Cell Cycle (Homo sapiens)	0.66207	0	1	0.0179453	10	0.00678196	200	1	396	0.0179453	0.66207	0.66207	10	80	0.00678196	9606	Homo sapiens			P35222	P63208;Q08050	R-HSA-4088141;R-HSA-8854052;R-HSA-4088024;R-HSA-4088134;R-HSA-4088439;R-HSA-4088309;R-HSA-4088162;R-HSA-4088130;R-HSA-4088306;R-HSA-4088307
	R-HSA-166520	Signaling by NTRKs	Signal Transduction (Homo sapiens)	0.664718	0	1	0.00924181	1	0.0102577	103	1	494	0.00924181	0.664718	0.664718	1	121	0.0102577	9606	Homo sapiens			P35222	P12931	R-HSA-9603419
	R-HSA-201722	Formation of the beta-catenin:TCF transactivating complex	Signal Transduction (Homo sapiens)	0.668654	1	1	0.00538358	13	0.00110207	60	1	534	0.00538358	0.668654	0.668654	13	13	0.00110207	9606	Homo sapiens	P35222	P35222	P35222	O14746;Q9Y265;Q9Y2T1;Q6P1J9	R-HSA-3299569;R-HSA-4411367;R-HSA-3322422;R-HSA-3451153;R-HSA-3364026;R-HSA-3322427;R-HSA-3322424;R-HSA-4411372;R-HSA-201712;R-HSA-4411351;R-HSA-3364014;R-HSA-4411357;R-HSA-3451147
	R-HSA-199992	trans-Golgi Network Vesicle Budding	Vesicle-mediated transport (Homo sapiens)	0.669305	0	1	0.00663975	1	0.00161072	74	1	516	0.00663975	0.669305	0.669305	1	19	0.00161072	9606	Homo sapiens			P01137	P05067	R-HSA-5229132
	R-HSA-3247509	Chromatin modifying enzymes	Chromatin organization (Homo sapiens)	0.672545	0	1	0.0215343	4	0.00712106	240	1	407	0.0215343	0.672545	0.672545	4	84	0.00712106	9606	Homo sapiens			P35222	Q8TEK3;Q92793	R-HSA-5649799;R-HSA-5649764;R-HSA-3697008;R-HSA-5649801
	R-HSA-4839726	Chromatin organization	Chromatin organization (Homo sapiens)	0.672545	0	1	0.0215343	4	0.00712106	240	1	407	0.0215343	0.672545	0.672545	4	84	0.00712106	9606	Homo sapiens			P35222	Q8TEK3;Q92793	R-HSA-5649799;R-HSA-5649764;R-HSA-3697008;R-HSA-5649801
	R-HSA-447115	Interleukin-12 family signaling	Immune System (Homo sapiens)	0.678298	0	1	0.00502467	3	0.00966429	56	1	547	0.00502467	0.678298	0.678298	3	114	0.00966429	9606	Homo sapiens			P01137	P07237	R-HSA-8950456;R-HSA-8950113;R-HSA-8950183
	R-HSA-597592	Post-translational protein modification	Metabolism of proteins (Homo sapiens)	0.69432	4	3	0.127142	15	0.0434045	1417	3	2469	0.127142	0.69432	0.69432	15	512	0.0434045	9606	Homo sapiens	P24821;P13611;P01137;P02751	P24821;P13611;P01137;P02751	P02751;P35222;Q14192	P38398;P25054;Q14526;P40337;P11388;Q92793;P10275;P26358;Q01826	R-HSA-4655431;R-HSA-4641350;R-HSA-2997709;R-HSA-5228525;R-HSA-4615905;R-HSA-4090390;R-HSA-8952289;R-HSA-3927959;R-HSA-4551721;R-HSA-6781905;R-HSA-4090281;R-HSA-4641342;R-HSA-4615839;R-HSA-2179291;R-HSA-2997616
	R-HSA-2559583	Cellular Senescence	Cellular responses to external stimuli (Homo sapiens)	0.700938	0	1	0.0147151	2	0.00746016	164	1	511	0.0147151	0.700938	0.700938	2	88	0.00746016	9606	Homo sapiens			P35453	P05412	R-HSA-450292;R-HSA-168136
	R-HSA-418555	G alpha (s) signalling events	Signal Transduction (Homo sapiens)	0.707944	0	1	0.0518618	2	0.00152594	578	1	61	0.0518618	0.707944	0.707944	2	18	0.00152594	9606	Homo sapiens			P35222	P12931	R-HSA-8964287;R-HSA-8964278
	R-HSA-168256	Immune System	Immune System (Homo sapiens)	0.741322	5	5	0.200359	21	0.126484	2233	5	3253	0.200359	0.741322	0.741322	21	1492	0.126484	9606	Homo sapiens	P02461;P08123;P01137;P35222;P02751	P02461;P08123;P01137;P35222;P02751	P01137;P35222;P35453;P02751;Q16853	Q04206;P07237;P05412;P19838;Q16623;P06241;P12830;P18146;P00519	R-HSA-6785895;R-HSA-5660980;R-HSA-199079;R-HSA-6789615;R-HSA-8950113;R-HSA-168136;R-HSA-3134883;R-HSA-3134914;R-HSA-389354;R-HSA-8950183;R-HSA-8950456;R-HSA-2130194;R-HSA-5696356;R-HSA-450292;R-HSA-5696357;R-HSA-451634;R-HSA-3134904;R-HSA-1015702;R-HSA-3134901;R-HSA-168440;R-HSA-449117
	R-HSA-392499	Metabolism of proteins	Metabolism of proteins (Homo sapiens)	0.773737	6	5	0.18035	29	0.0740081	2010	5	3521	0.18035	0.773737	0.773737	29	873	0.0740081	9606	Homo sapiens	P24821;Q15582;P13611;P01137;P35222;P02751	P24821;Q15582;P13611;P01137;P35222;P02751	P01137;P02751;P35222;Q14192;Q16853	P25054;Q14526;Q9NYA1;Q96BA8;Q92793;P26358;Q01826;P05067;P38398;P40337;P18847;P11388;P10275	R-HSA-4655431;R-HSA-4641350;R-HSA-8871494;R-HSA-8874184;R-HSA-976734;R-HSA-8874194;R-HSA-8874193;R-HSA-4090281;R-HSA-4615839;R-HSA-5692495;R-HSA-2997616;R-HSA-1791173;R-HSA-2997709;R-HSA-381799;R-HSA-5228525;R-HSA-9010091;R-HSA-8874212;R-HSA-4615905;R-HSA-391266;R-HSA-4090390;R-HSA-8952289;R-HSA-3927959;R-HSA-4551721;R-HSA-6781905;R-HSA-4641342;R-HSA-9010096;R-HSA-2179291;R-HSA-9010034;R-HSA-9771…
	R-HSA-913531	Interferon Signaling	Immune System (Homo sapiens)	0.800208	0	1	0.0259309	1	0.00559512	289	1	573	0.0259309	0.800208	0.800208	1	66	0.00559512	9606	Homo sapiens			P35222	P18146	R-HSA-1015702
	R-HSA-212436	Generic Transcription Pathway	Gene expression (Transcription) (Homo sapiens)	0.82187	4	4	0.110722	71	0.0686673	1234	4	3265	0.110722	0.82187	0.82187	71	810	0.0686673	9606	Homo sapiens	P10071;P48436;P01137;P35222	P10071;P48436;P01137;P35222	P01137;P02751;P35222;Q14192	P08648;P02452;Q12778;Q13761;Q9GZV5;P25490;Q99593;O15169;Q99697;Q92793;P49841;P29279;Q92597;P38398;P46937;P12931;Q8N9N5;P00519;Q12837	R-HSA-8937864;R-HSA-9623059;R-HSA-8985227;R-HSA-2032794;R-HSA-212356;R-HSA-8937856;R-HSA-8937728;R-HSA-8878220;R-HSA-8951428;R-HSA-8956676;R-HSA-2032781;R-HSA-8951966;R-HSA-2032775;R-HSA-1989766;R-HSA-8951442;R-HSA-8951443;R-HSA-8939667;R-HSA-4411357;R-HSA-9625101;R-HSA-9626928;R-HSA-8878117;R-HSA-4411367;R-HSA-8985644;R-HSA-8865454;R-HSA-6804425;R-HSA-8864307;R-HSA-9625510;R-HSA-8952382;R-HSA-88…
	R-HSA-8878171	Transcriptional regulation by RUNX1	Gene expression (Transcription) (Homo sapiens)	0.836191	0	1	0.0186631	7	0.0111902	208	1	760	0.0186631	0.836191	0.836191	7	132	0.0111902	9606	Homo sapiens			P35222	P46937;P12931;O15169;Q92793;P00519	R-HSA-8932076;R-HSA-8956639;R-HSA-8937728;R-HSA-8937682;R-HSA-8956659;R-HSA-8956676;R-HSA-8938231
	R-HSA-73857	RNA Polymerase II Transcription	Gene expression (Transcription) (Homo sapiens)	0.855324	4	4	0.121669	72	0.0738386	1356	4	3382	0.121669	0.855324	0.855324	72	871	0.0738386	9606	Homo sapiens	P10071;P48436;P01137;P35222	P10071;P48436;P01137;P35222	P01137;P02751;P35222;Q14192	P08648;P02452;Q12778;Q13761;Q9GZV5;P25490;Q99593;O15169;Q99697;Q92793;P49841;P29279;Q92597;P38398;P46937;P12931;P52747;Q8N9N5;P00519;Q12837	R-HSA-8937864;R-HSA-9623059;R-HSA-8985227;R-HSA-2032794;R-HSA-212356;R-HSA-8937856;R-HSA-8937728;R-HSA-8878220;R-HSA-8951428;R-HSA-8956676;R-HSA-2032781;R-HSA-8951966;R-HSA-2032775;R-HSA-1989766;R-HSA-8951442;R-HSA-8951443;R-HSA-8939667;R-HSA-4411357;R-HSA-9625101;R-HSA-9626928;R-HSA-8878117;R-HSA-4411367;R-HSA-8985644;R-HSA-8865454;R-HSA-6804425;R-HSA-6807496;R-HSA-8864307;R-HSA-9625510;R-HSA-89…
	R-HSA-388396	GPCR downstream signalling	Signal Transduction (Homo sapiens)	0.861615	0	2	0.103544	6	0.020685	1154	2	648	0.103544	0.861615	0.861615	6	244	0.020685	9606	Homo sapiens			P02751;P35222	P52292;P12931	R-HSA-8964329;R-HSA-9619127;R-HSA-8964287;R-HSA-112282;R-HSA-8964278;R-HSA-8964311
	R-HSA-1640170	Cell Cycle	Cell Cycle (Homo sapiens)	0.876977	0	2	0.0558098	15	0.0347575	622	2	1456	0.0558098	0.876977	0.876977	15	410	0.0347575	9606	Homo sapiens			P35222;Q14192	P38398;O14746;Q9Y265;P63208;P11388;Q08050;P49841	R-HSA-8854052;R-HSA-4088024;R-HSA-4088439;R-HSA-164616;R-HSA-4088309;R-HSA-4088306;R-HSA-4088307;R-HSA-75820;R-HSA-4088141;R-HSA-4088134;R-HSA-912503;R-HSA-8964531;R-HSA-4088162;R-HSA-4088130;R-HSA-912467
	R-HSA-74160	Gene expression (Transcription)	Gene expression (Transcription) (Homo sapiens)	0.89449	4	4	0.13441	76	0.0831638	1498	4	3561	0.13441	0.89449	0.89449	76	981	0.0831638	9606	Homo sapiens	P10071;P48436;P01137;P35222	P10071;P48436;P01137;P35222	P01137;P02751;P35222;Q14192	P08648;P02452;Q12778;Q13761;Q9GZV5;P25490;Q99593;O15169;Q99697;Q92793;P26358;P49841;P29279;Q92597;P38398;P46937;P12931;Q8N9N5;P52747;P00519;Q12837	R-HSA-8937864;R-HSA-9623059;R-HSA-8985227;R-HSA-2032794;R-HSA-212356;R-HSA-8937856;R-HSA-8937728;R-HSA-8878220;R-HSA-8951428;R-HSA-8956676;R-HSA-2032781;R-HSA-8951966;R-HSA-427409;R-HSA-2032775;R-HSA-1989766;R-HSA-8951442;R-HSA-8951443;R-HSA-8939667;R-HSA-4411357;R-HSA-9625101;R-HSA-9626928;R-HSA-8878117;R-HSA-4411367;R-HSA-8985644;R-HSA-8865454;R-HSA-6804425;R-HSA-6807496;R-HSA-8864307;R-HSA-962…
	R-HSA-69278	Cell Cycle, Mitotic	Cell Cycle (Homo sapiens)	0.919798	0	1	0.0462091	12	0.0272974	515	1	915	0.0462091	0.919798	0.919798	12	322	0.0272974	9606	Homo sapiens			P35222	P63208;P11388;Q08050;P49841	R-HSA-4088141;R-HSA-8854052;R-HSA-4088024;R-HSA-4088134;R-HSA-4088439;R-HSA-4088309;R-HSA-8964531;R-HSA-4088162;R-HSA-4088130;R-HSA-4088306;R-HSA-4088307;R-HSA-75820
	R-HSA-372790	Signaling by GPCR	Signal Transduction (Homo sapiens)	0.92593	0	2	0.109197	6	0.0356901	1217	2	1000	0.109197	0.92593	0.92593	6	421	0.0356901	9606	Homo sapiens			P02751;P35222	P52292;P12931	R-HSA-8964329;R-HSA-9619127;R-HSA-8964287;R-HSA-112282;R-HSA-8964278;R-HSA-8964311
	R-HSA-199991	Membrane Trafficking	Vesicle-mediated transport (Homo sapiens)	0.952547	0	1	0.0569762	1	0.0184808	635	1	1026	0.0569762	0.952547	0.952547	1	218	0.0184808	9606	Homo sapiens			P01137	P05067	R-HSA-5229132
	R-HSA-168249	Innate Immune System	Immune System (Homo sapiens)	0.965496	1	2	0.106146	10	0.0551882	1183	2	1610	0.106146	0.965496	0.965496	10	651	0.0551882	9606	Homo sapiens	P35222	P35222	P35222;P35453	Q04206;P05412;P19838;P00519	R-HSA-5660980;R-HSA-2130194;R-HSA-450292;R-HSA-451634;R-HSA-3134904;R-HSA-3134901;R-HSA-168440;R-HSA-168136;R-HSA-3134883;R-HSA-3134914
	R-HSA-8953854	Metabolism of RNA	Metabolism of RNA (Homo sapiens)	0.981307	0	1	0.0605653	4	0.0158528	675	1	1529	0.0605653	0.981307	0.981307	4	187	0.0158528	9606	Homo sapiens			Q14192	Q9NQ94;Q9NPI6	R-HSA-77608;R-HSA-450431;R-HSA-927813;R-HSA-450488
	R-HSA-556833	Metabolism of lipids	Metabolism (Homo sapiens)	0.983255	1	1	0.0669358	1	0.0688369	746	1	1370	0.0669358	0.983255	0.983255	1	812	0.0688369	9606	Homo sapiens	Q14192	Q14192	Q14192	Q14192	R-HSA-1989747
